# Supplementary material for: Highly stable deep red-to-NIR OLEDs with an external quantum efficiency of 4.9% from room temperature nanostructured columnar fluids based on hetero atom bay-annulated perylene bisimides
Source: Royal Society of Chemistry journal article supplement (doi:10.1039/d2tc03224d), 2022-01-01
Supplement: d2tc03224d1.pdf [file d2tc03224d1.pdf]

## Supporting information

### Table of Contents

| <b>Serial Number</b> | <b>Contents</b>                         | <b>Page numbers</b> |
|----------------------|-----------------------------------------|---------------------|
| 1                    | Materials and methods                   | S2                  |
| 2                    | Experimental Section                    | S3-S6               |
| 3                    | NMR Spectra                             | S7-S13              |
| 4                    | MALDI-TOF mass spectra                  | S13-S15             |
| 5                    | Photophysical studies                   | S15-S18             |
| 6                    | Quantum Yield Measurement (relative)    | S18-S19             |
| 7                    | Time resolved photoluminescence studies | S19-S20             |
| 8                    | Thermal behavior                        | S20                 |
| 9                    | XRD Studies                             | S20-S24             |
| 10                   | Device Fabrication & characterization   | S24-S28             |
| 11                   | DFT Studies                             | S28-S46             |
| 12                   | References                              | S46                 |

## 1. Materials and methods

Commercially available chemicals were used without any purification; solvents were dried following the standard procedures. Chromatography was performed using either silica gel (60-120 mesh) or neutral aluminium oxide. For thin layer chromatography, aluminium sheets pre-coated with silica gel were employed. IR spectra were recorded on a Perkin Elmer IR spectrometer at normal temperature by using KBr pellet. The spectral positions are given in wave number ( $\text{cm}^{-1}$ ) unit. NMR spectra were recorded using Bruker 600 MHz NMR spectrometer. For  $^1\text{H}$  NMR spectra, the chemical shifts are reported in ppm relative to TMS as an internal standard. Coupling constants are given in Hz. Mass spectra were determined from MALDI-TOF mass spectrometer using  $\alpha$ -Cyano-4-hydroxycinnamic acid as a matrix or High Resolution Mass Spectrometer. The mesogenic compounds were investigated for their liquid crystalline behavior (birefringence and fluidity) by employing a polarizing optical microscope (Nikon Eclipse LV100POL) equipped with a programmable hot stage (Mettler Toledo FP90). Clean glass slides and coverslips were employed for the polarizing optical microscopic observations. The transition temperatures and associated enthalpy changes were determined by differential scanning calorimeter (Mettler Toledo DSC1) under nitrogen atmosphere. Peak temperatures obtained in DSC corresponding to transitions were in agreement with the polarizing optical microscopic observations. The transition temperatures obtained from calorimetric measurements of the first heating and cooling cycles at a rate of  $5\text{ }^\circ\text{C}/\text{min}$  are tabulated. X-ray diffraction measurements were carried out using image plate (IP) and a solid state detector. In this apparatus Cu K $_{\alpha}$  ( $\lambda = 0.15418\text{ nm}$ ) radiation from a source (GeniX3D, Xenocs) operating at 50 kV and 0.6 mA in conjunction with a multilayer mirror was used to illuminate the sample, which was contained in a glass capillary tube (Capillary Tube Supplies Ltd). The temperature of the sample was varied using a Mettler hot stage/programmer (FP82HT/FP90). The diffraction patterns were collected on a 2D IP detector of 345 mm diameter and 0.1 mm pixel size (Mar345, Mar Research). Thermogravimetric analysis (TGA) was performed using thermogravimetric analyzer (Mettler Toledo, model TG/SDTA 851 e) under a nitrogen flow at a heating rate of  $10\text{ }^\circ\text{C}/\text{min}$ . UV-Vis spectra were obtained by using Perkin-Elmer Lambda 750, UV/VIS/NIR spectrometer. Fluorescence emission spectra in solution state were recorded with Horiba Fluoromax-4 fluorescence spectrophotometer or Perkin Elmer LS 50B spectrometer. Cyclic Voltammetry studies were carried out using a Versa Stat 3 (Princeton Applied Research) Electrochemical workstation.

## 2. Experimental Section:

### Scheme 1. Synthesis of bay-annulated PBIs

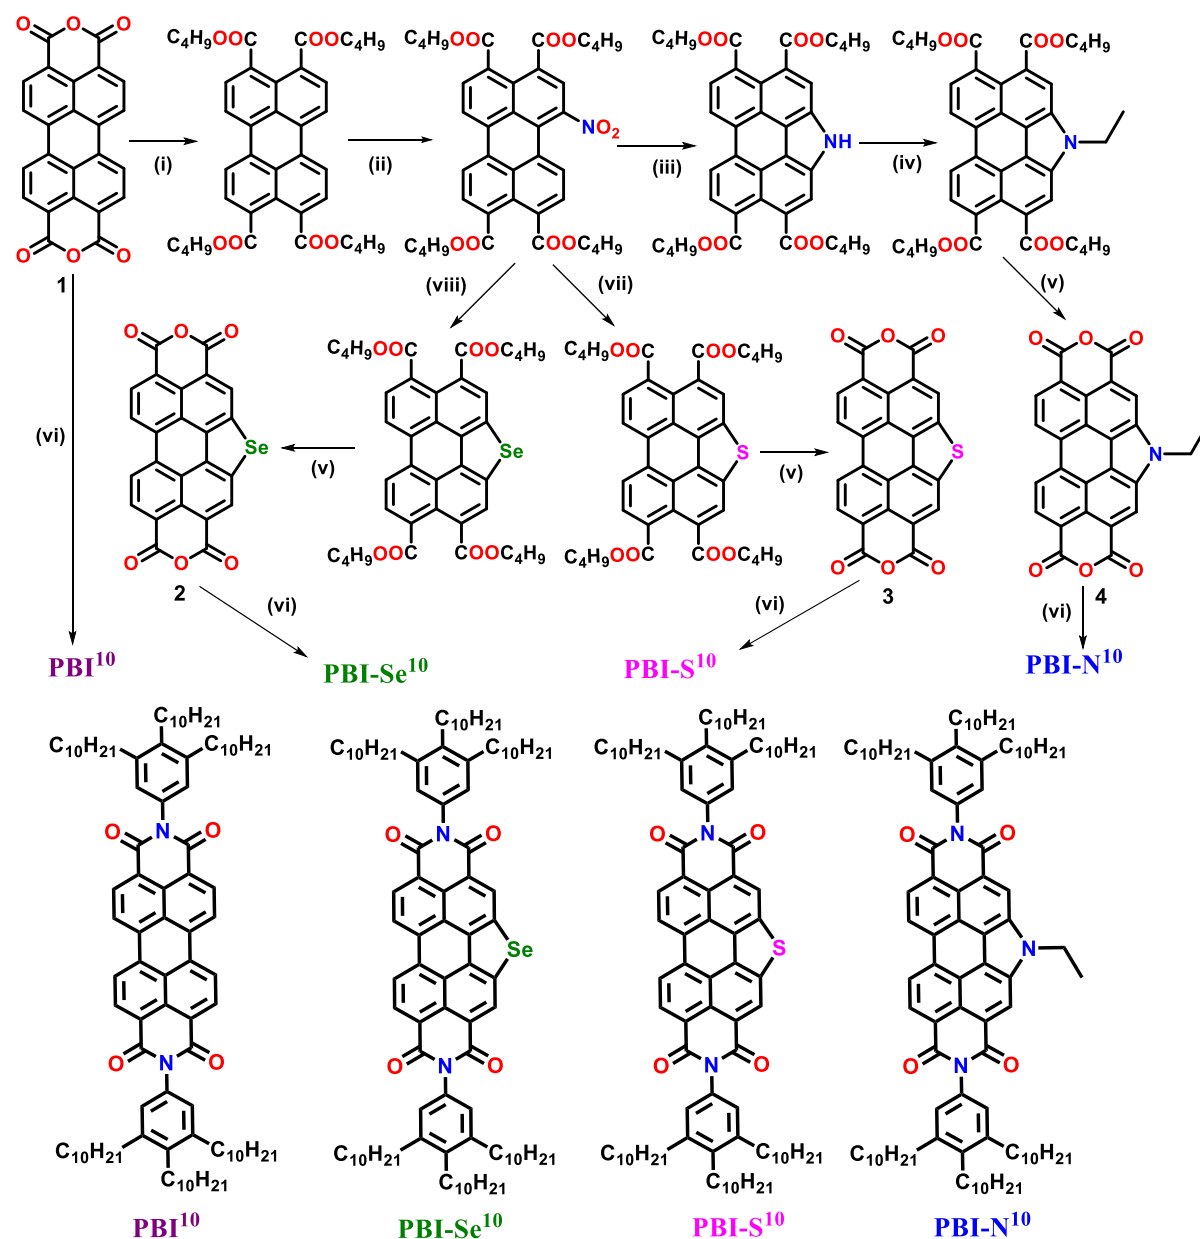

**Scheme 1.** Synthesis of bay-annulated perylene bisimides. Reagents and conditions: (i) KOH, H<sub>2</sub>O, 70 °C, 0.5 h, 1M HCl, Aliquat 336, KI, 1-bromobutane, reflux, 12 h (76%); (ii) NaNO<sub>2</sub>, HNO<sub>3</sub>, 0 °C, 1 h (90 %); (iii) triethyl phosphite, 160 °C, reflux, 4 h, N<sub>2</sub>, (60%); (iv) NaH, 1-iodoethane, Dry THF, reflux, 17 h (75%); (v) p-toluene sulphonic acid mono hydrate, toluene, 100 °C, 30 h (90%); (vi) 8, zinc acetate, imidazole, 165 °C, microwave, 30 min. (80–90%); (vii) sulfur powder, anh. NMP, N<sub>2</sub>, 70 °C, 0.5 h, 180 °C, 17 h (55%); (viii) selenium powder, anh. NMP, N<sub>2</sub>, 70 °C, 0.5 h, 180 °C, 17 h (55 %).

## Scheme 2. Synthesis of 3,4,5-tris(decyl)aniline

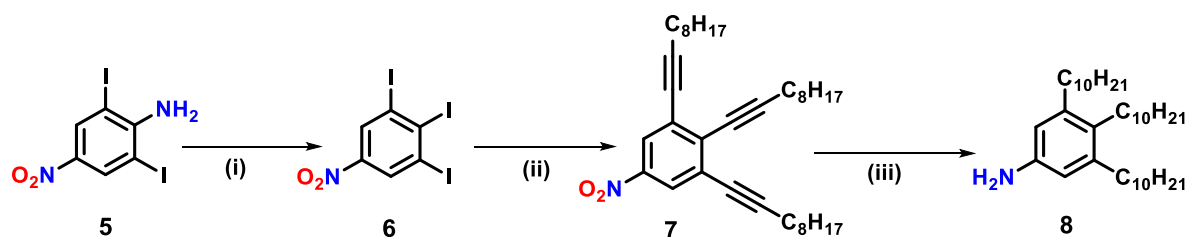

**Reagents and conditions.** (I) NaNO<sub>2</sub>, H<sub>2</sub>SO<sub>4</sub>, AcOH, H<sub>2</sub>O, KI, 90 °C, 91% (II) CuI, Et<sub>3</sub>N, 4h, Pd(PPh<sub>3</sub>)<sub>2</sub>Cl<sub>2</sub>, 80 °C, 4h, 89% (III) EtOAc, MeOH, H<sub>2</sub>-Pd/C, rt, overnight, 95%.

### Procedure for the synthesis of 3, 4, 5-Triiodonitrobenzene (6): <sup>[S1]</sup>

An ice-cold solution of sodium nitrite (1.37 g) in concentrated sulfuric acid (7.7 mL) was added dropwise into a well-stirred suspension of 2,6-diiodo-4-nitroaniline (5.5 g, 0.014 mol) in acetic acid (33 mL) in an ice-bath. The reaction mixture was kept below 25 °C with stirring until all diiodonitroaniline was dissolved. The resulting deep yellow solution was poured into ice water (200 mL). Urea (0.5 g) was added into the above reaction solution to remove the excess nitrous acid and then filtered. The filtrate was added with the solution of potassium iodide (3.30 g) in water (16.5 mL) dropwise with vigorous stirring, leading to the formation of a yellow precipitate. The reaction mixture was heated to 85-90 °C in a water-bath, and afterwards cooled to room temperature. Sodium bisulfite (0.5 g) was added into the reaction solution to remove excess iodine. The yellow precipitate was separated by filtration and washed with water, then dried in vacuum. The crude product was purified by silica gel column chromatography with *n*-hexane /dichloromethane (1:1) as eluent to give a yellow solid. (6.40 g, 91%). *R<sub>f</sub>* = 0.6 (5% EtOAc-Hexane). <sup>1</sup>H-NMR (600 MHz, CDCl<sub>3</sub>, 299 K): δ = 8.61 (s, 2H, Ar-H). <sup>13</sup>C NMR (150 MHz, CDCl<sub>3</sub>, 298.1K): δ 147.50, 132.86, 131.02, 106.96; MALDI-TOF exact mass calculated for C<sub>6</sub>H<sub>2</sub>I<sub>3</sub>NO<sub>2</sub> (M+H<sup>+</sup>): 501.80, found: 501.89.

### Procedure for the Synthesis of 3,4,5-Tris(1'-decynyl)-nitrobenzene (7): <sup>[S2]</sup>

To a well stirred suspension of 3,4,5-Triiodonitrobenzene (3.0 g, 6.0 mmol), bis(triphenylphosphine)-palladium(II) dichloride (252 mg, 0.30 mmol), copper(I) iodide (115 mg, 0.60 mmol) in triethylamine (80 mL) under argon atmosphere at 80 °C, 1-decyne (2.737 g, 19.8 mmol) was added dropwise and the reaction mixture was stirred for another 4 h, maintaining the same conditions. After cooling to room temperature, the solid precipitate was filtered and the filtrate was concentrated by rotary evaporation. The residue was purified by silica gel column chromatography with *n*-hexanes to obtain a brown oil (2.9 g, 89%). *R<sub>f</sub>* =

0.70 (5% EtOAc-Hexane).  $^1\text{H}$  NMR (600 MHz,  $\text{CDCl}_3$ , 299 K):  $\delta$  = 8.08 (s, 2H, Ar-H), 2.54-2.46 (t, 6H,  $J$  = 7.0 Hz,  $\text{C}\equiv\text{CCH}_2$ ), 1.65 (m, 6H,  $\text{CH}_2$ ), 1.4-1.1 (m, 30H,  $\text{CH}_2$ ), 0.88 (t, 9H,  $J$  = 6.7 Hz,  $\text{CH}_3$ ). MALDI-TOF exact mass calculated for  $\text{C}_{36}\text{H}_{53}\text{NO}_2$  ( $\text{M}+\text{H}^+$ ): 532.83, found: 532.67.

#### **Procedure for the synthesis of 3,4,5-Trisdecylaniline (8):** <sup>[S2]</sup>

1,2,3-Tri(1-decynyl)-5-nitrobenzene (1.5 g, 2.82 mmol) was dissolved in a mixture of ethyl acetate (25 mL) and methanol (5 mL). Argon was bubbled through the solution for 15 minutes after which Pd/C (160 mg) was carefully added and the mixture was subsequently subjected to hydrogenation in a Parr hydrogenation apparatus at 150 psi for 24 h. Upon completion of the reaction, the suspension was filtered and the filtrate was concentrated *in vacuo* to yield a reddish brown viscous liquid (1.38 g, 95%).  $R_f$  = 0.3 (5% EtOAc-Hexane).  $^1\text{H}$  NMR (600MHz,  $\text{CDCl}_3$ , 299 K):  $\delta$  = 6.38 (s, 2H, Ar-H), 2.47 (t,  $J$  = 7.4 Hz, 6H,  $\text{ArCH}_2$ ), 1.6–1.0 (m, 48H, aliphatic), 0.88 (t,  $J$  = 6.8 Hz, 9H,  $\text{CH}_3$ ). MALDI-TOF exact mass calculated for  $\text{C}_{36}\text{H}_{65}\text{NH}_2$  ( $\text{M}+\text{H}^+$ ): 514.94, found: 514.64.

#### **General procedures for synthesis of PBIs** <sup>[S3]</sup>

Compound **1**, **2**, **3** & **4** (1 eq.), tridecyl aniline (2.2 eq.), zinc acetate (2 eq.) and imidazole (1 g) were taken in a microwave vessel, flushed with nitrogen and put in microwave reactor. The mixture was heated to 165 °C for 35 minutes at 35 W and 100 psi pressure. After cooling, reaction mixture was poured into a 2N HCl (10 mL) solution and extracted with chloroform. Organic layer was washed with water and saturated sodium chloride solution. The crude compound was purified by neutral alumina column chromatography using 50% chloroform-hexane system. Further purification was done by recrystallization from chloroform-methanol system.

**PBI<sup>10</sup>** :  $R_f$  = 0.6 (10% EtoAc-Hexane); Dark red waxy solid, yield: 86%; IR:  $\nu_{\text{max}}$  in  $\text{cm}^{-1}$ : 2955, 2924, 2854, 1698, 1664, 1592, 1504, 1464, 1439, 1404, 1371, 1332, 1240, 1196, 1114, 858, 809, 744, 722;  $^1\text{H}$  NMR (600 MHz,  $\text{CDCl}_3$ , 299 K): 8.73 (d,  $J$  = 12 Hz, 4H,  $\text{H}_{\text{Ar}}$ ), 8.63 (d,  $J$  = 6 Hz, 4H,  $\text{H}_{\text{Ar}}$ ), 6.98 (s, 4H,  $\text{H}_{\text{Ar}}$ ), 2.65 (t, 12H,  $6 \times -\text{CH}_2$ ), 1.6 (m, 12H,  $6 \times -\text{CH}_2$ ), 1.5-1.1 (m, 84H,  $42 \times -\text{CH}_2$ ), 0.88 (t, 18H,  $6 \times -\text{CH}_3$ );  $^{13}\text{C}$  NMR (150 MHz,  $\text{CDCl}_3$ , 298.1 K):  $\delta$  163.85, 142.41, 139.52, 134.99, 132.34, 131.91, 129.87, 126.78, 126.40, 123.84, 123.41, 77.44, 77.33, 77.02, 33.39, 32.18, 32.14, 31.50, 30.98, 30.67, 30.25, 29.92, 29.88, 29.86, 29.74, 29.66, 29.64, 22.59, 22.91, 14.37, 14.35; MALDI-TOF exact mass calculated for  $\text{C}_{96}\text{H}_{138}\text{N}_2\text{O}_4$  ( $\text{M}$ )<sup>-</sup>: 1384.09, found: 1384.031.

**PBI-N<sup>10</sup>** :  $R_f = 0.6$  (10% EtOAc-Hexane); Dark red waxy solid, yield: 86%; IR:  $\nu_{\max}$  in  $\text{cm}^{-1}$  : 2955, 2923, 2854, 1706, 1667, 1595, 1561, 1466, 1427, 1364, 1351, 1319, 1244, 1185, 1127, 845, 807, 744, 722;  $^1\text{H}$  NMR (600 MHz,  $\text{CDCl}_3$ , 299 K): 9.03 (s, 2H,  $\text{H}_{\text{Ar}}$ ), 8.94 (d,  $J=12\text{Hz}$ , 2H,  $\text{H}_{\text{Ar}}$ ), 8.87 (d,  $J=12\text{ Hz}$ , 2H,  $\text{H}_{\text{Ar}}$ ), 7.06 (s, 4H,  $\text{H}_{\text{Ar}}$ ), 4.98 (d,  $J = 6\text{ Hz}$ , 2H, N- $\underline{\text{CH}_2}$ ) 2.69 (t, 12H,  $6 \times -\text{CH}_2$ ), 1.66 (t, 3H, N- $\text{CH}_2$ - $\underline{\text{CH}_3}$ ), 1.58 (m, 12H,  $6 \times -\text{CH}_2$ ), 1.42-1.26 (m, 84H,  $42 \times -\text{CH}_2$ ), 0.88 (t, 18H,  $-\text{CH}_3$ );  $^{13}\text{C}$  NMR (150 MHz,  $\text{CDCl}_3$ , 298.1 K):  $\delta$  165.67, 164.54, 142.47, 139.57, 134.63, 133.87, 132.76, 130.25, 128.20, 126.69, 124.06, 123.14, 122.99, 120.16, 119.21, 41.96, 32.17, 30.29, 30.24, 29.92, 29.79, 29.75, 29.71, 29.68, 29.60, 22.94, 22.90, 17.07, 14.38, 14.34; MALDI-TOF exact mass calculated for  $\text{C}_{98}\text{H}_{141}\text{N}_3\text{O}_4$  ( $\text{M}^-$ ) : 1425.11, found: 1425.049.

**PBI-S<sup>10</sup>** :  $R_f = 0.6$  (10% EtoAc-Hexane); Orange red waxy solid, yield: 78%; IR:  $\nu_{\max}$  in  $\text{cm}^{-1}$  : 2955, 2923, 2854, 1706, 1667, 1595, 1561, 1466, 1427, 1364, 1351, 1319, 1244, 1185, 1127, 845, 807, 744, 722;  $^1\text{H}$  NMR (600 MHz,  $\text{CDCl}_3$ , 299 K): 9.39 (s, 2H,  $\text{H}_{\text{Ar}}$ ), 9.03 (d,  $J = 12\text{ Hz}$ , 2H,  $\text{H}_{\text{Ar}}$ ), 8.99 (d,  $J=12\text{ Hz}$ , 2H,  $\text{H}_{\text{Ar}}$ ), 7.03 (s, 4H,  $\text{H}_{\text{Ar}}$ ), 2.67 (t, 12H,  $6 \times -\text{CH}_2$ ), 1.6 (m, 12H,  $6 \times -\text{CH}_2$ ), 1.5-1.1 (m, 84H,  $42 \times -\text{CH}_2$ ), 0.88 (t, 18H,  $6 \times -\text{CH}_3$ );  $^{13}\text{C}$  NMR (150 MHz,  $\text{CDCl}_3$ , 298.1 K):  $\delta$  164.54, 164.09, 142.48, 139.57, 138.63, 133.87, 132.76, 132.13, 130.25, 128.20, 126.69, 126.50, 124.06, 123.73, 123.38, 122.99, 33.40, 32.17, 32.13, 31.50, 30.97, 30.68, 30.24, 29.92, 29.88, 29.86, 29.75, 29.66, 29.64, 29.59, 29.05, 22.94, 22.90, 14.38, 14.34; MALDI-TOF exact mass calculated for  $\text{C}_{96}\text{H}_{136}\text{N}_2\text{O}_4\text{S}$  ( $\text{M}^-$ ) : 1414.802, found: 1414.509.

**PBI-Se<sup>10</sup>** :  $R_f = 0.6$  (10% EtoAc-Hexane); Dark red waxy solid, yield: 76%; IR:  $\nu_{\max}$  in  $\text{cm}^{-1}$  : 2955, 2923, 2854, 1706, 1667, 1595, 1561, 1466, 1427, 1364, 1351, 1319, 1244, 1185, 1127, 845, 807, 744, 722;  $^1\text{H}$  NMR (600 MHz,  $\text{CDCl}_3$ , 299 K): 9.37 (s, 2H,  $\text{H}_{\text{Ar}}$ ), 8.94 (d,  $J=12\text{ Hz}$ , 2H,  $\text{H}_{\text{Ar}}$ ), 8.92 (d,  $J=12\text{ Hz}$ , 2H,  $\text{H}_{\text{Ar}}$ ), 7.03 (s, 4H,  $\text{H}_{\text{Ar}}$ ), 2.67 (t, 12H,  $6 \times -\text{CH}_2$ ), 1.6 (m, 12H,  $6 \times -\text{CH}_2$ ), 1.5-1.1 (m, 84H,  $42 \times -\text{CH}_2$ ), 0.88 (t, 18H,  $6 \times -\text{CH}_3$ );  $^{13}\text{C}$  NMR (150 MHz,  $\text{CDCl}_3$ , 298.1 K):  $\delta$  164.54, 164.05, 142.46, 140.99, 138.63, 139.53, 134.88, 133.95, 132.69, 130.50, 126.50, 124.95, 123.55, 123.08, 122.53, 33.40, 32.18, 32.14, 31.49, 30.99, 30.69, 30.26, 29.93, 29.88, 29.87, 29.75, 29.67, 29.65, 29.59, 29.05, 22.95, 22.91, 14.38, 14.35; MALDI-TOF exact mass calculated for  $\text{C}_{96}\text{H}_{136}\text{N}_2\text{O}_4\text{Se}$  ( $\text{M}^-$ ) : 1461.13, found: 1461.935.

### 3. NMR Spectra

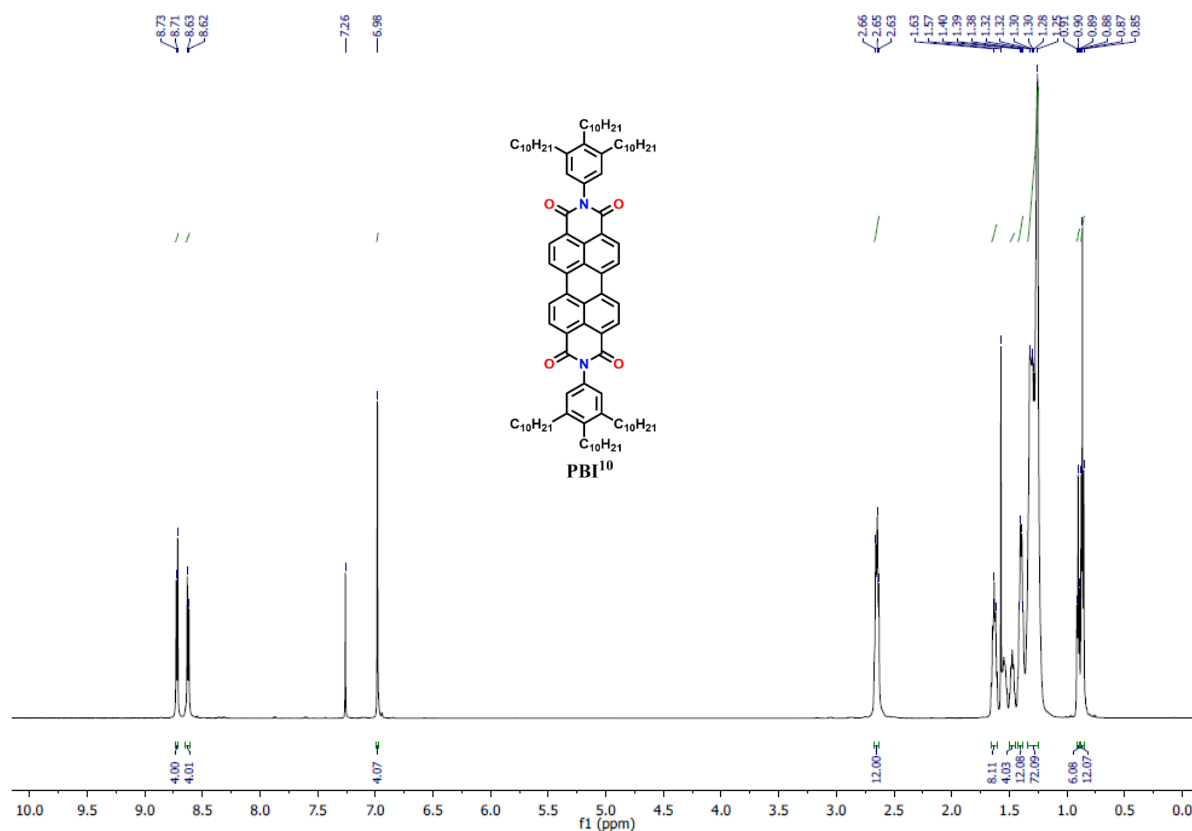

**Figure S1.** <sup>1</sup>H NMR (600 MHz) spectra of PBI<sup>10</sup> in CDCl<sub>3</sub>.

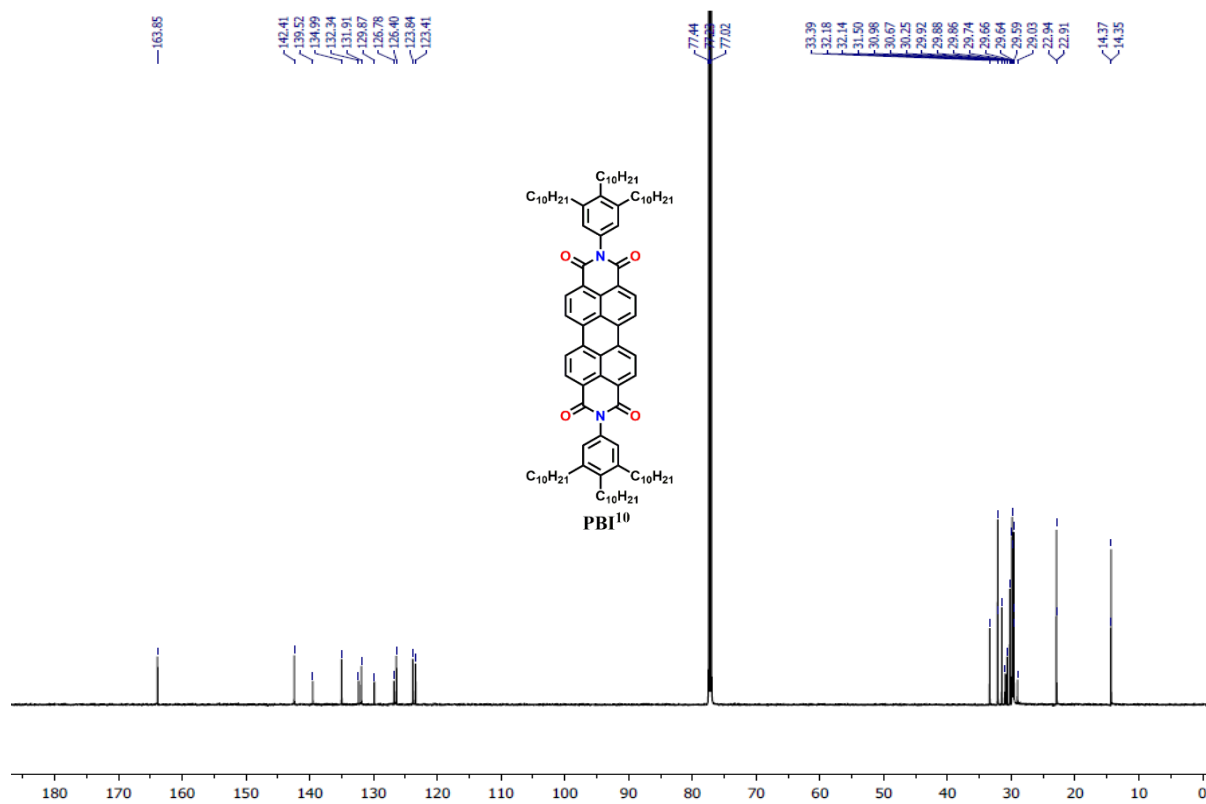

**Figure S2.** <sup>13</sup>C NMR (150 MHz) spectra of PBI<sup>10</sup> in CDCl<sub>3</sub>.

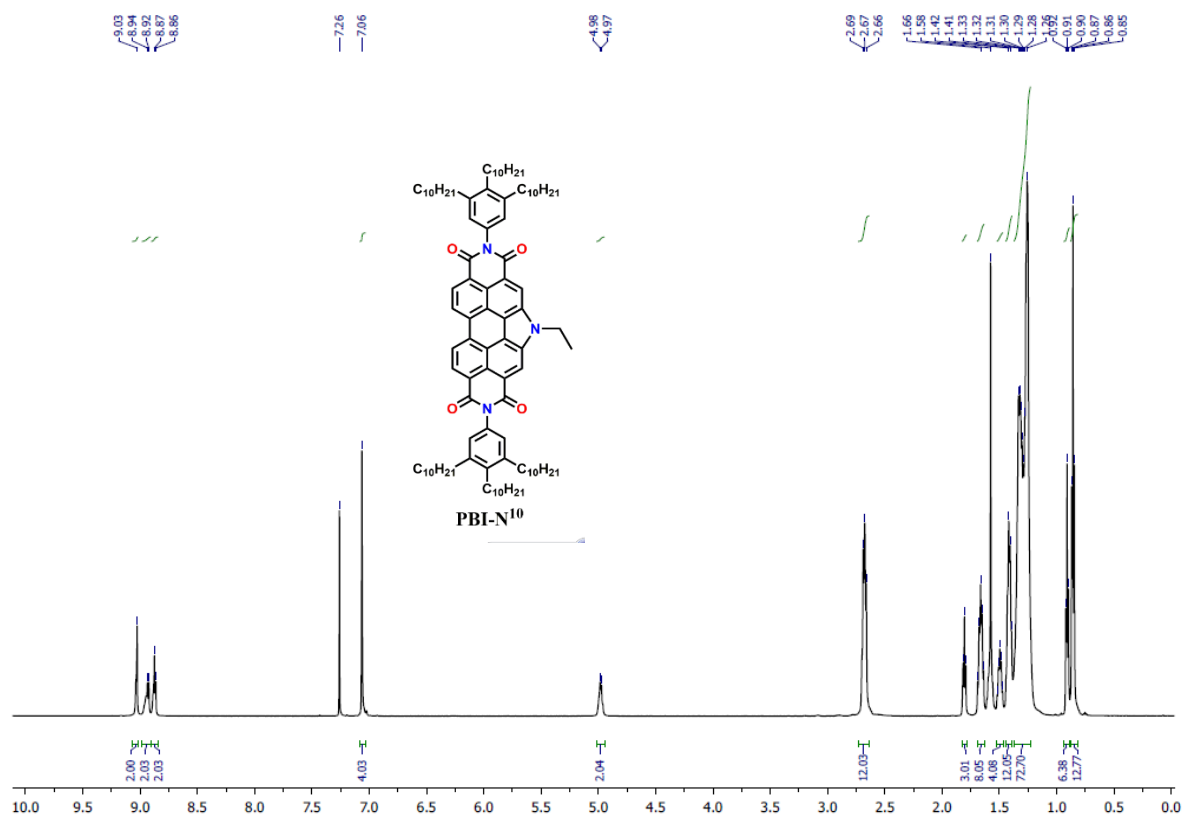

**Figure S3.** <sup>1</sup>H NMR (600 MHz) spectra of PBI-N<sup>10</sup> in CDCl<sub>3</sub>.

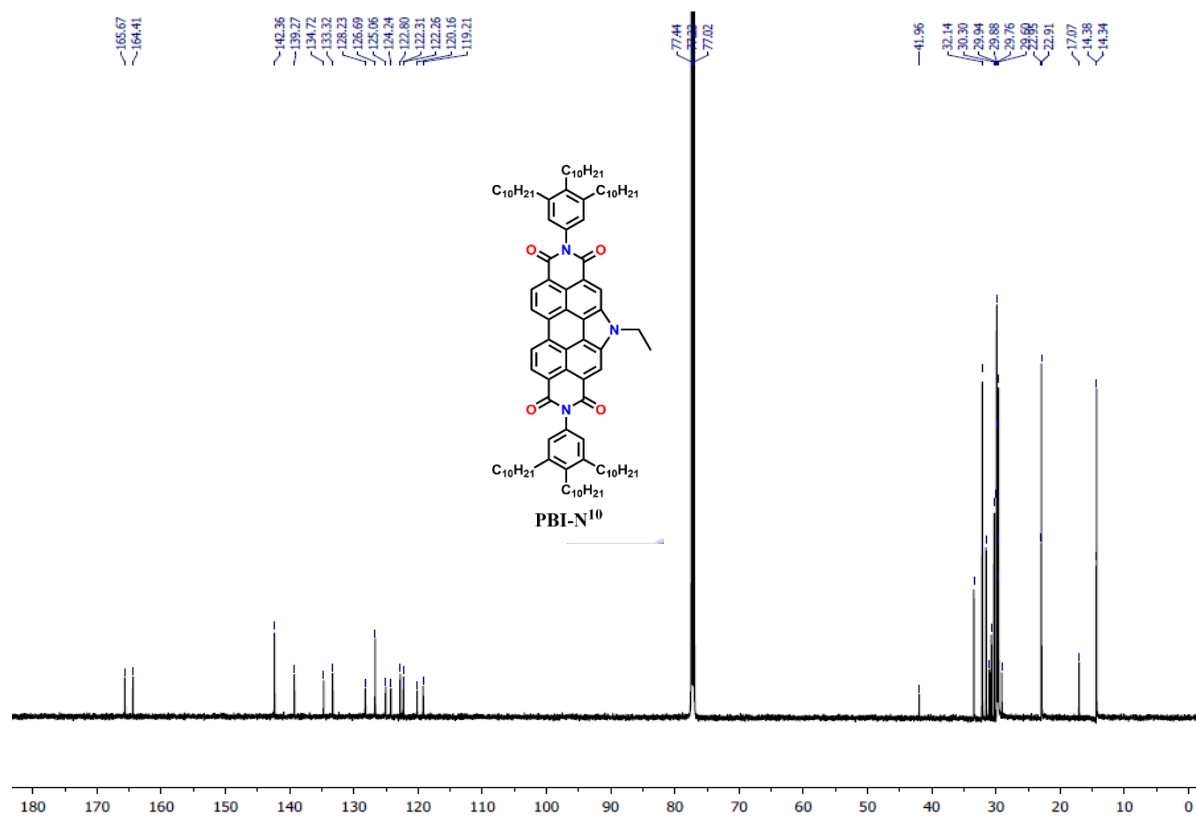

**Figure S4.** <sup>13</sup>C NMR (150 MHz) spectra of PBI-N<sup>10</sup> in CDCl<sub>3</sub>.



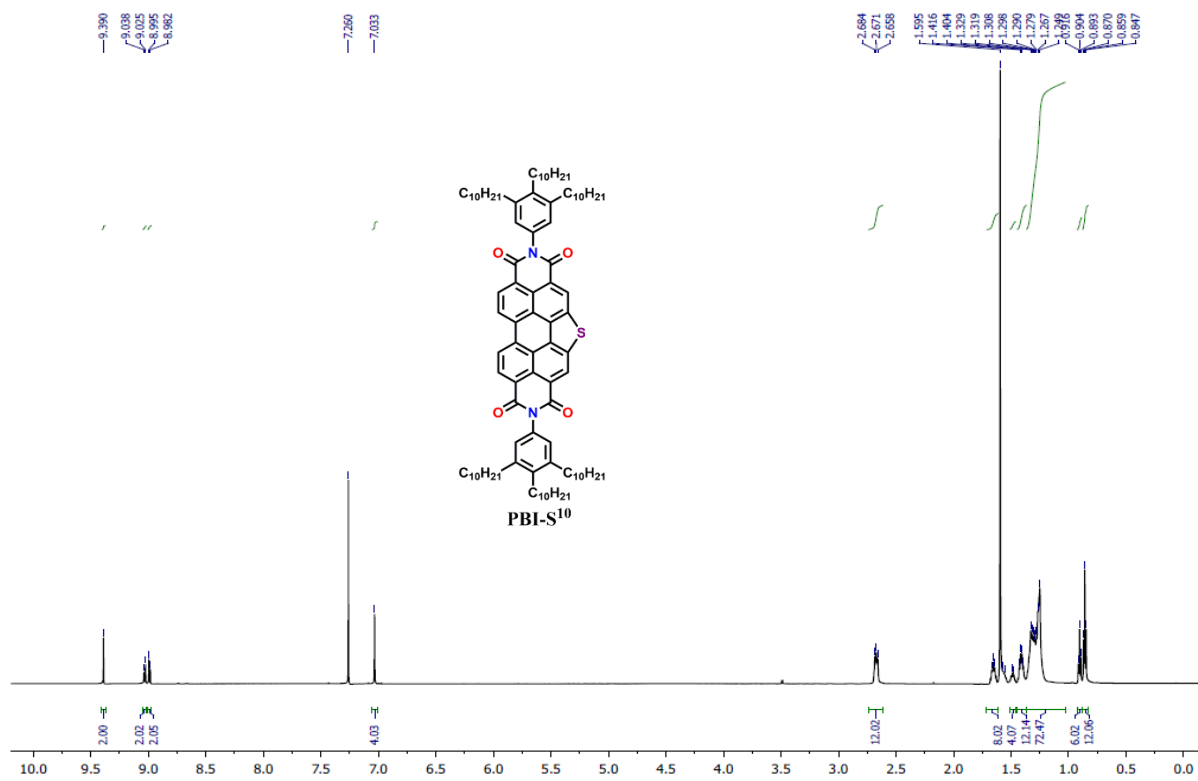

**Figure S5.** <sup>1</sup>H NMR (600 MHz) spectra of **PBI-S<sup>10</sup>** in CDCl<sub>3</sub>.

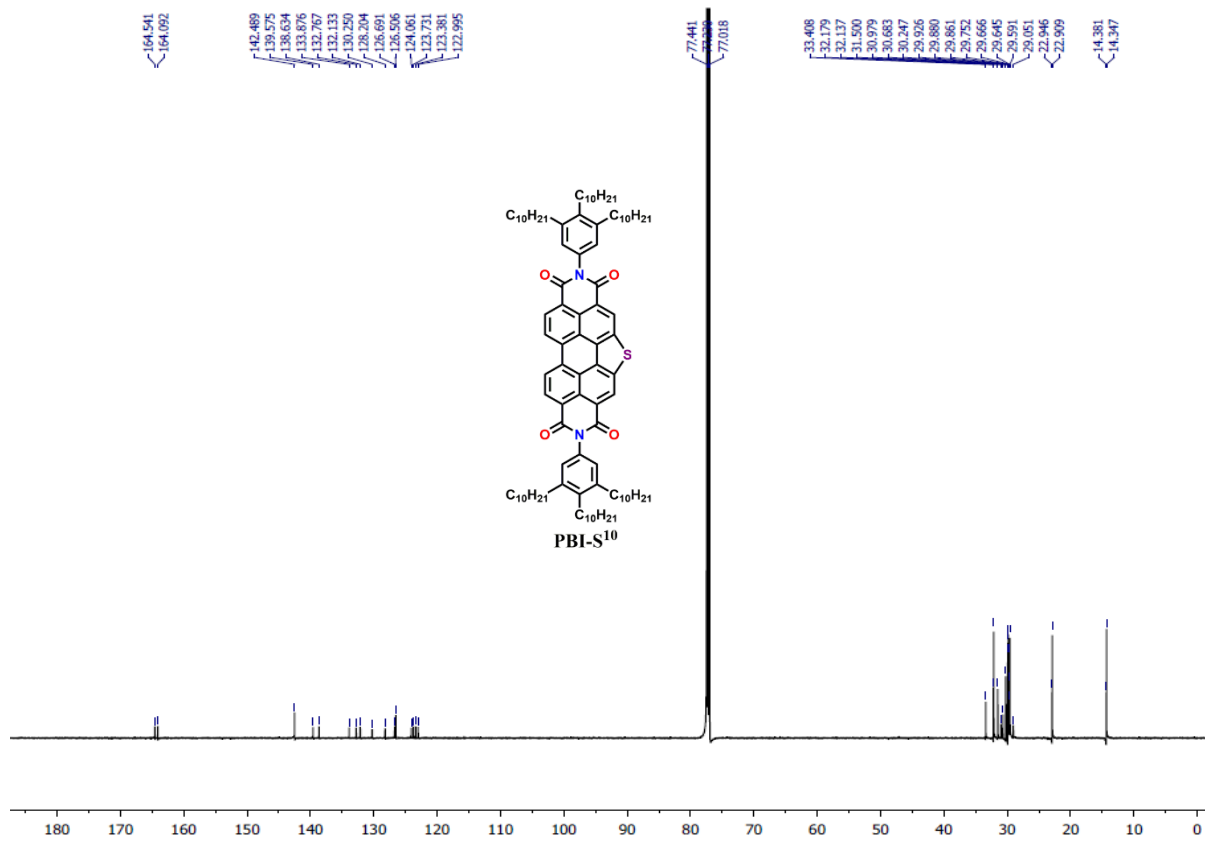

**Figure S6.** <sup>13</sup>C NMR (150 MHz) spectra of **PBI-S<sup>10</sup>** in CDCl<sub>3</sub>.

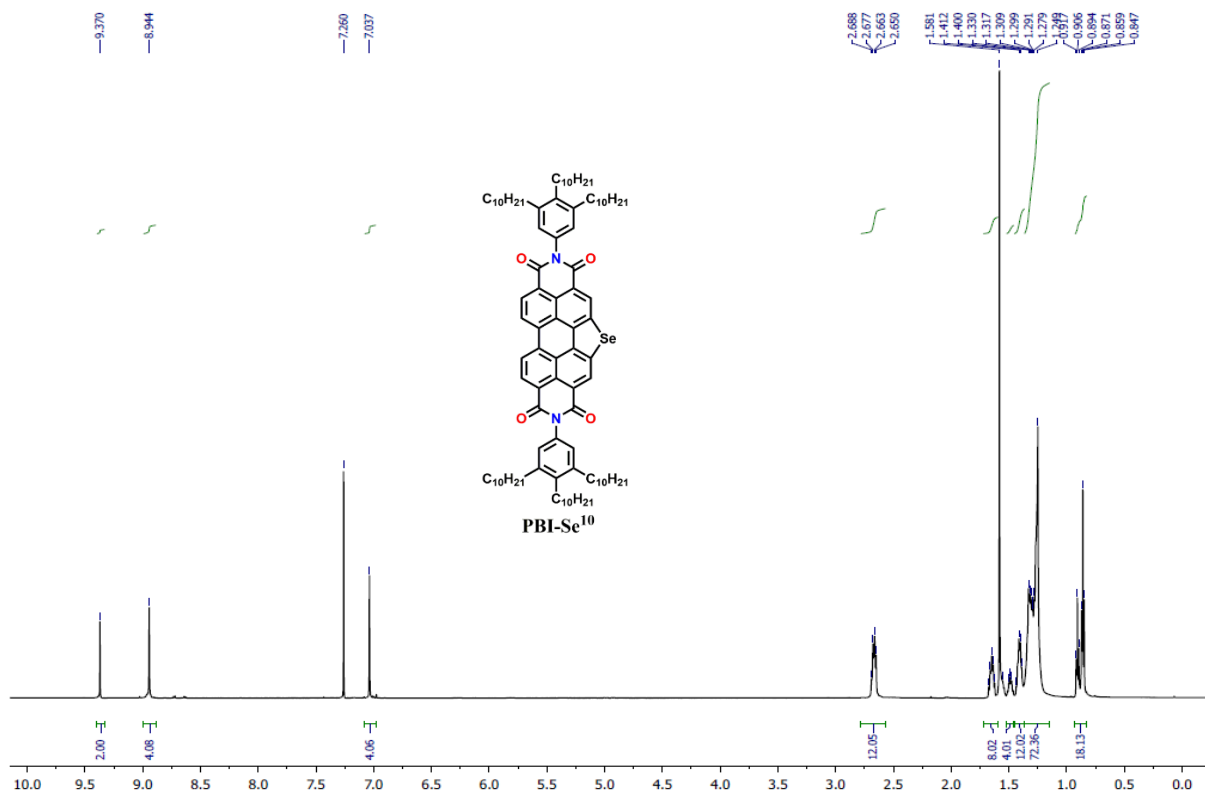

Figure S7. <sup>1</sup>H NMR (600 MHz) spectra of PBI-Se<sup>10</sup> in CDCl<sub>3</sub>.

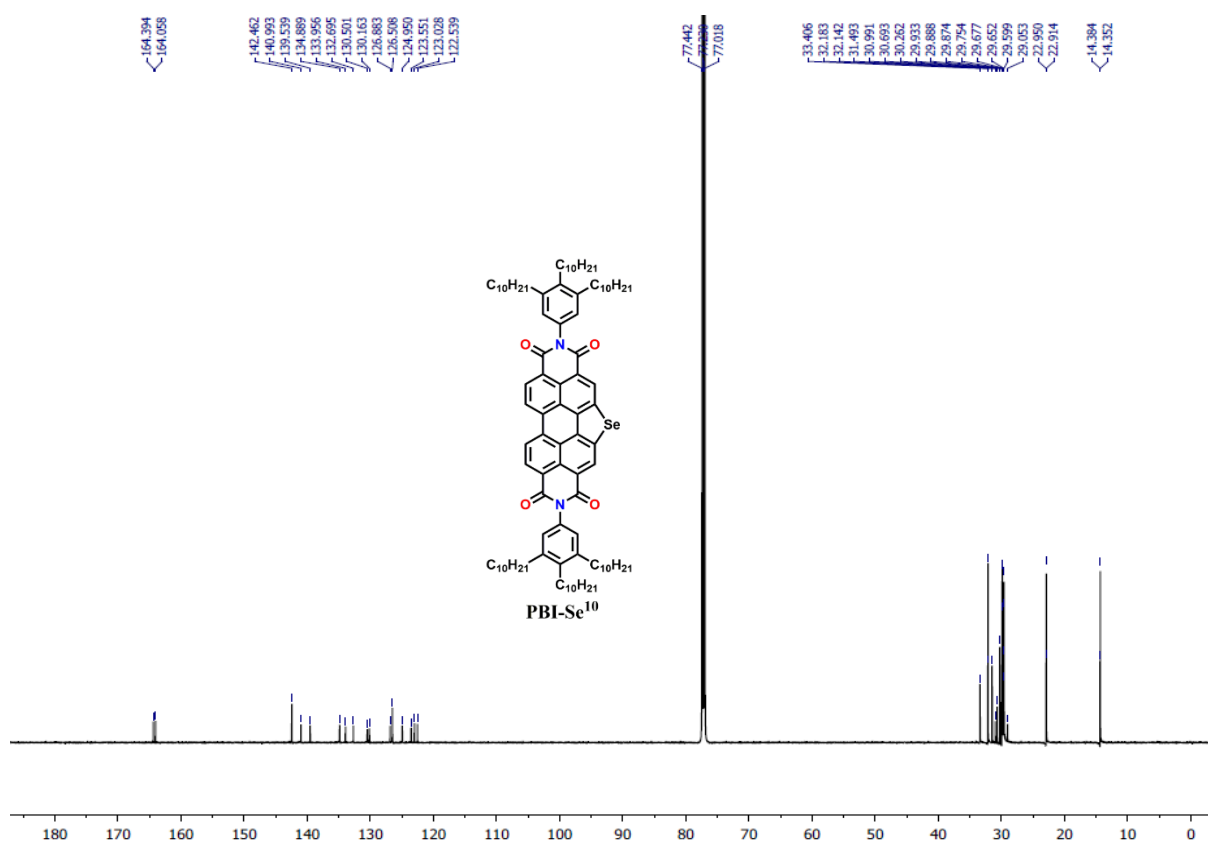

Figure S8. <sup>13</sup>C NMR (150 MHz) spectra of PBI-Se<sup>10</sup> in CDCl<sub>3</sub>.



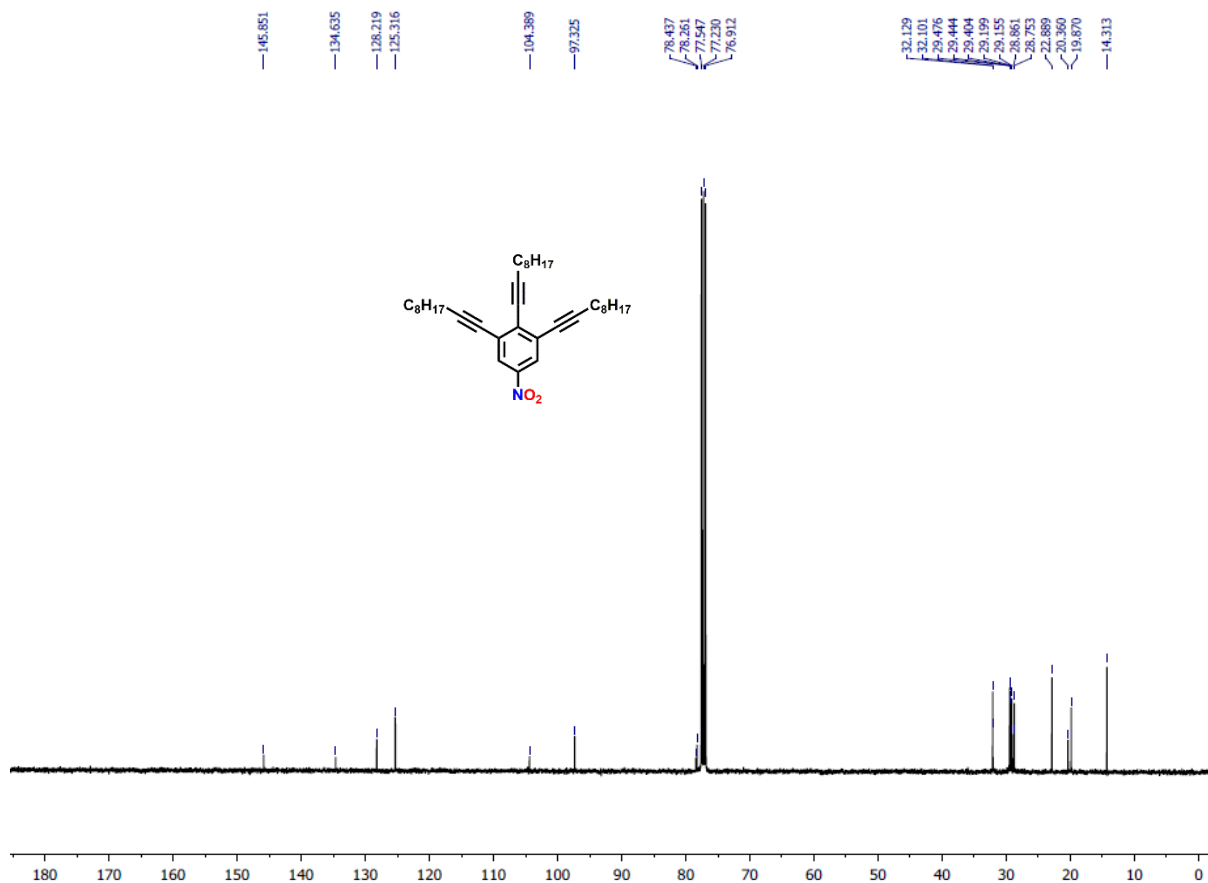

**Figure S11.** <sup>13</sup>C NMR (150 MHz) spectra of 3,4,5-Tris(1<sup>o</sup>-decynyl)-nitrobenzene (**7**) in CDCl<sub>3</sub>.

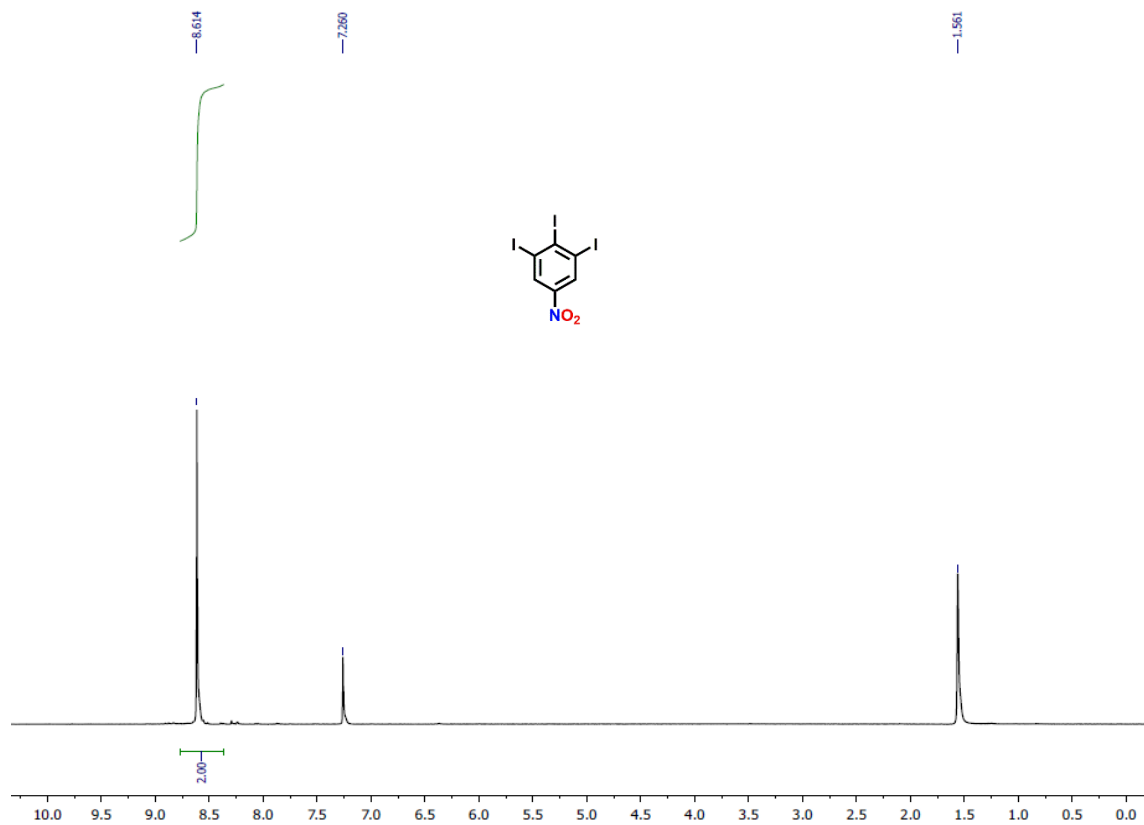

**Figure S12.** <sup>1</sup>H NMR (600 MHz) spectra of 3, 4, 5-Triiodonitrobenzene (**6**) in CDCl<sub>3</sub>.

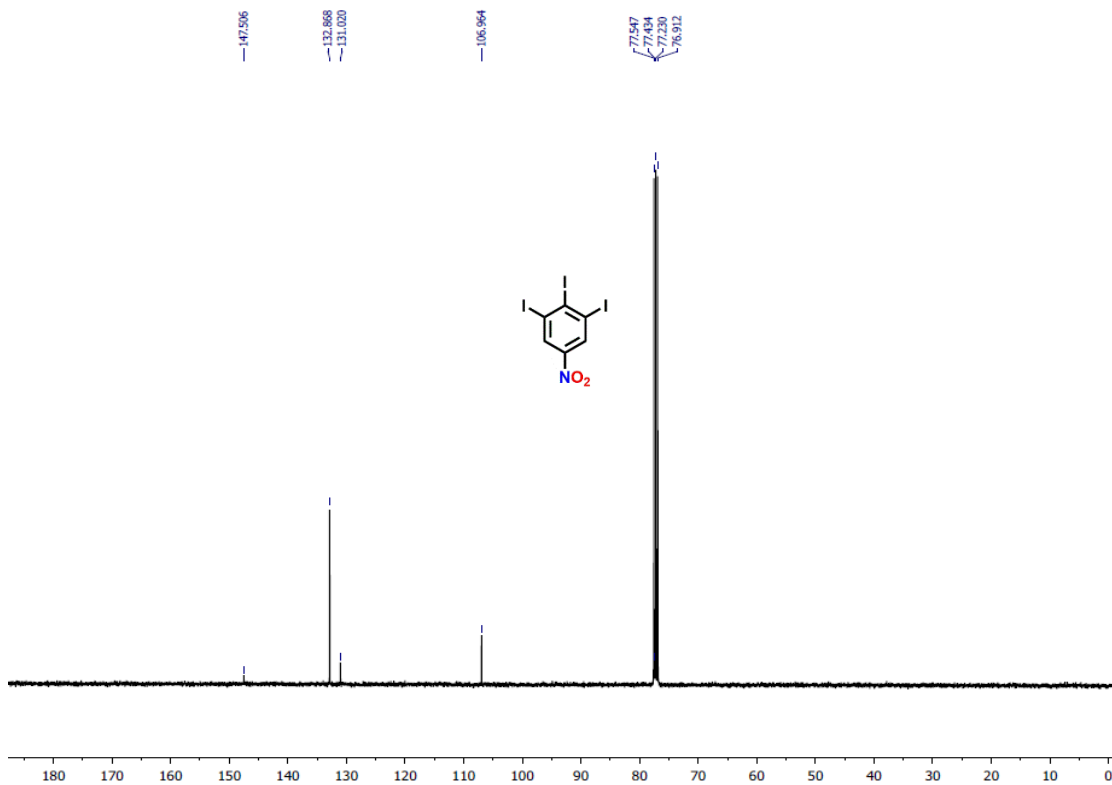

**Figure S13.**  $^{13}\text{C}$  NMR (150 MHz) spectra of 3, 4, 5-Triiodonitrobenzene (**6**) in  $\text{CDCl}_3$ .

#### 4. MALDI-TOF mass spectra

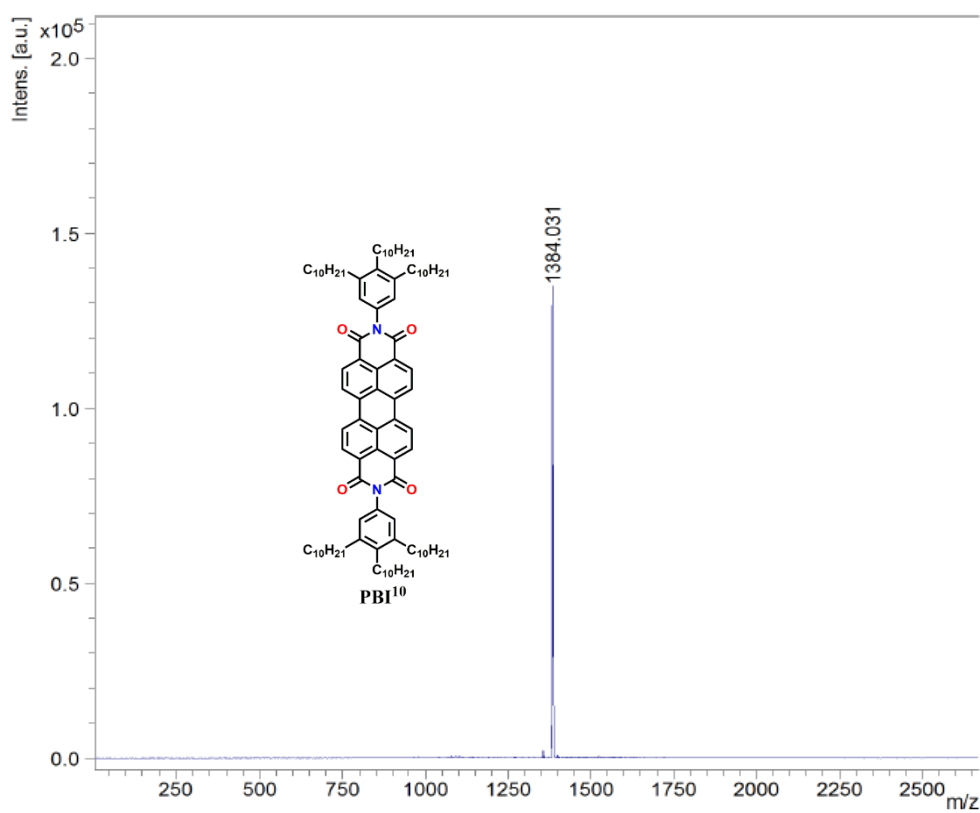

**Figure S14.** MALDI-TOF mass spectrum of **PBI<sup>10</sup>**.

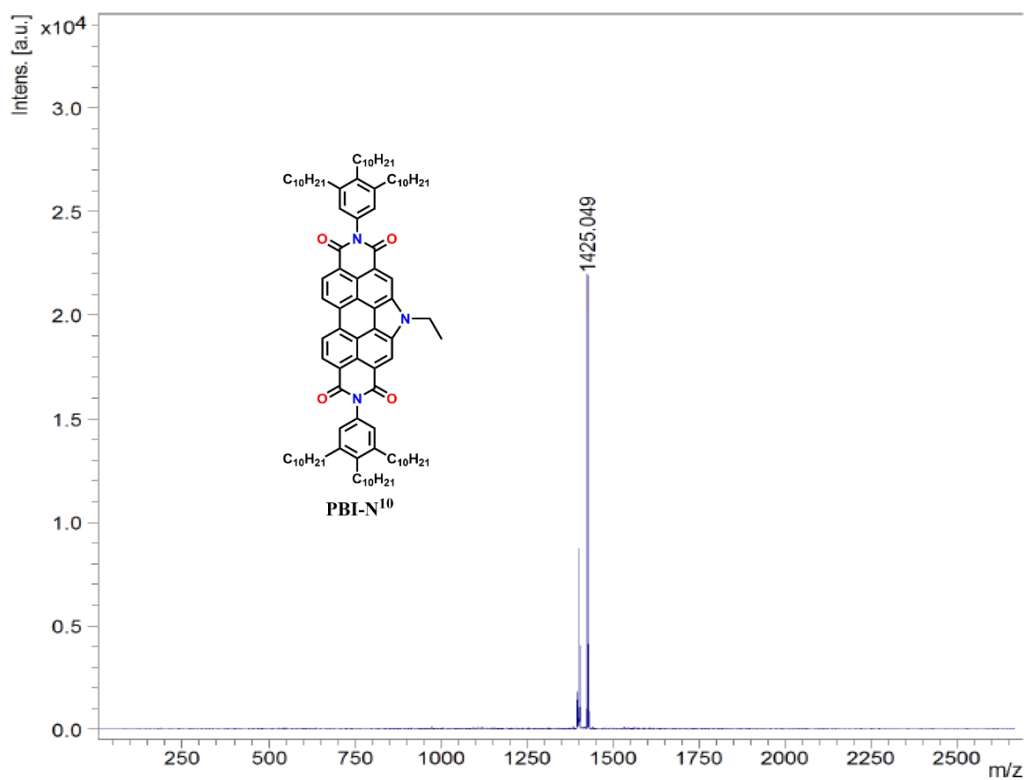

Figure S15. MALDI-TOF mass spectrum of PBI-N<sup>10</sup>.

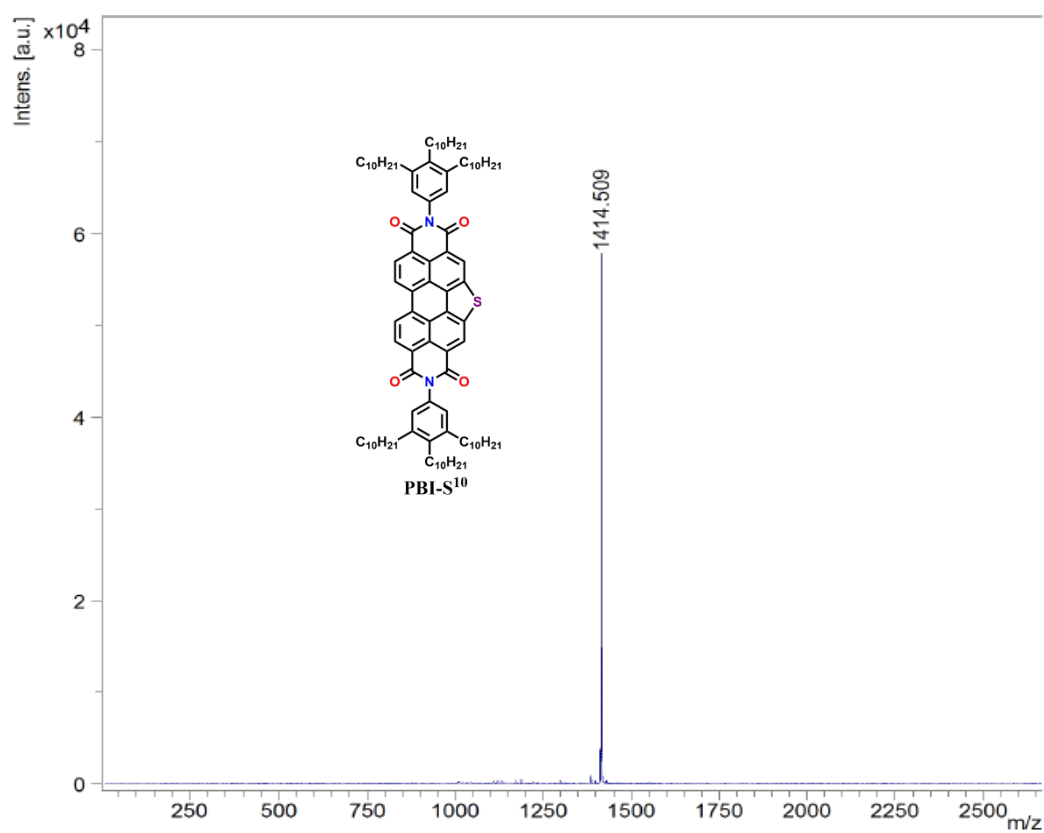

Figure S16. MALDI-TOF mass spectrum of PBI-S<sup>10</sup>.

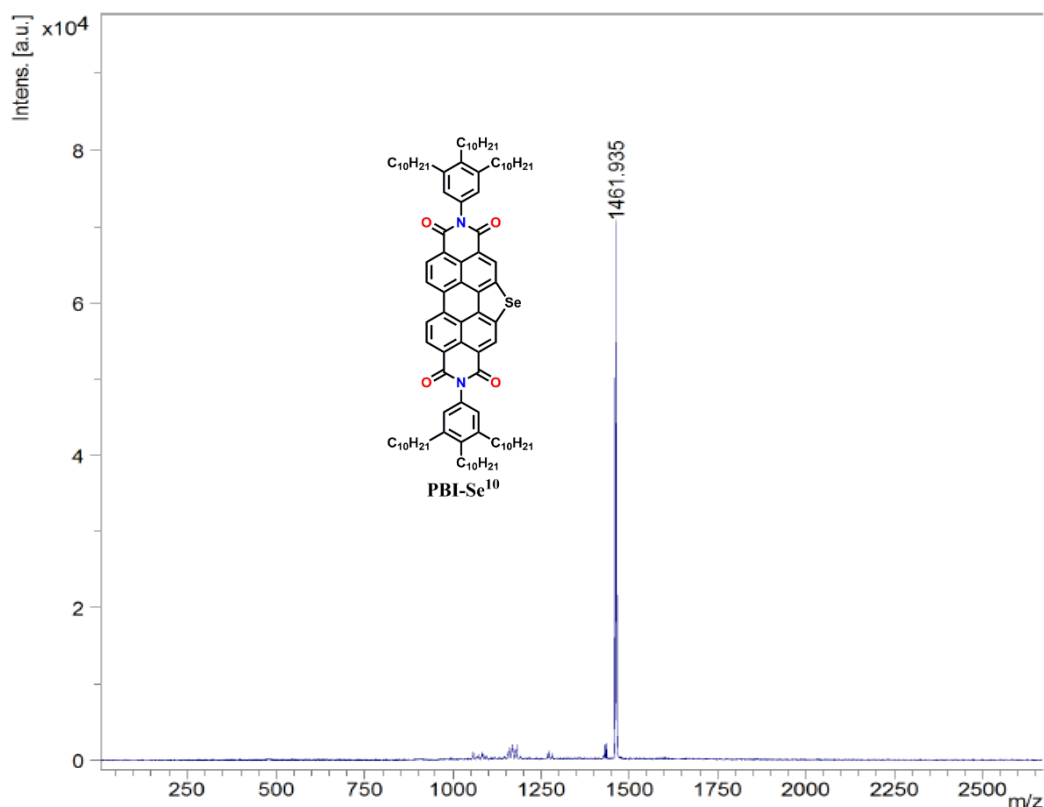

**Figure S17.** MALDI-TOF mass spectrum of **PBI-Se<sup>10</sup>**.

## 5. Photophysical studies

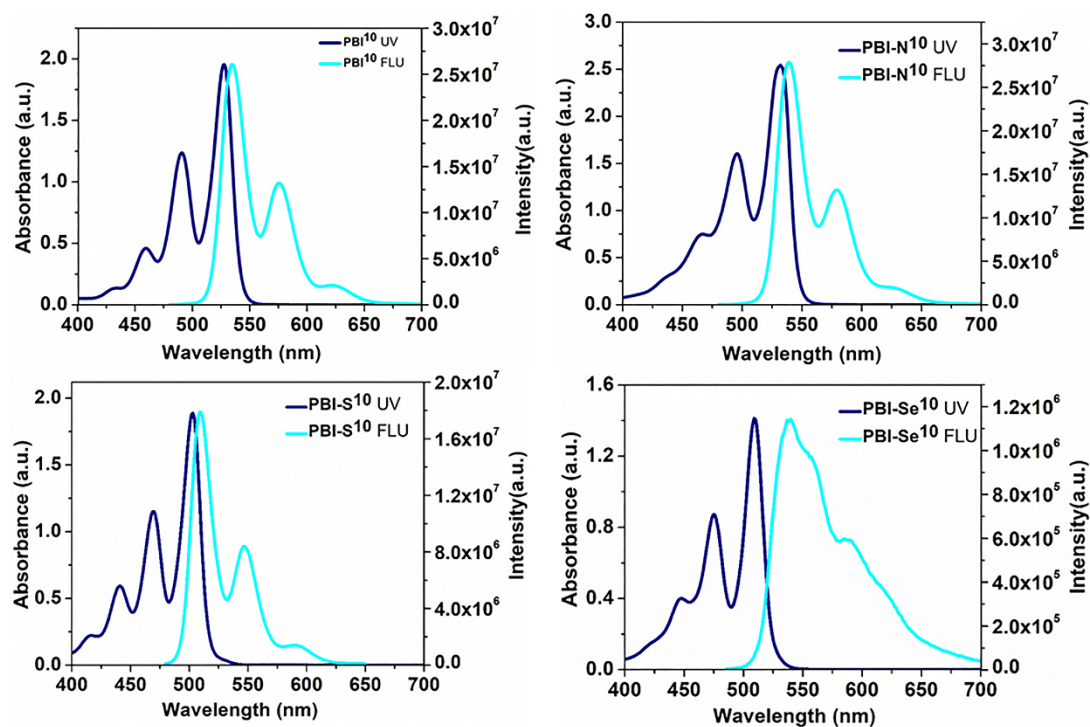

**Figure S18.** Overlay of absorption (blue trace) and emission (cyan trace) spectra of PBIs in micromolar chloroform solutions.

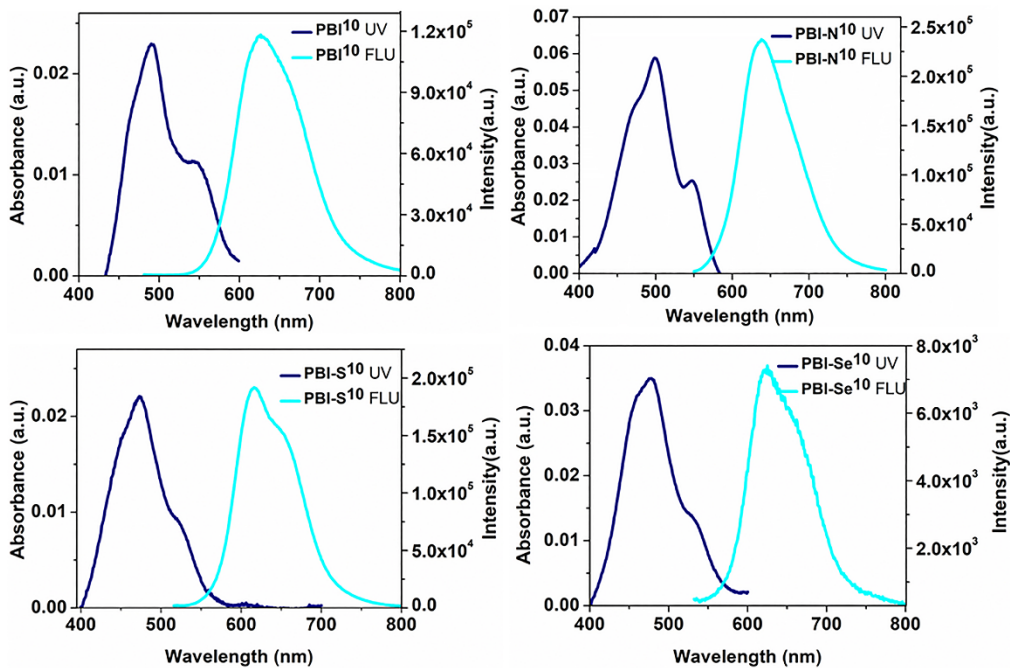

**Figure S19.** Overlay of absorption (blue trace) and emission (cyan trace) spectra of PBIs in thin film state.

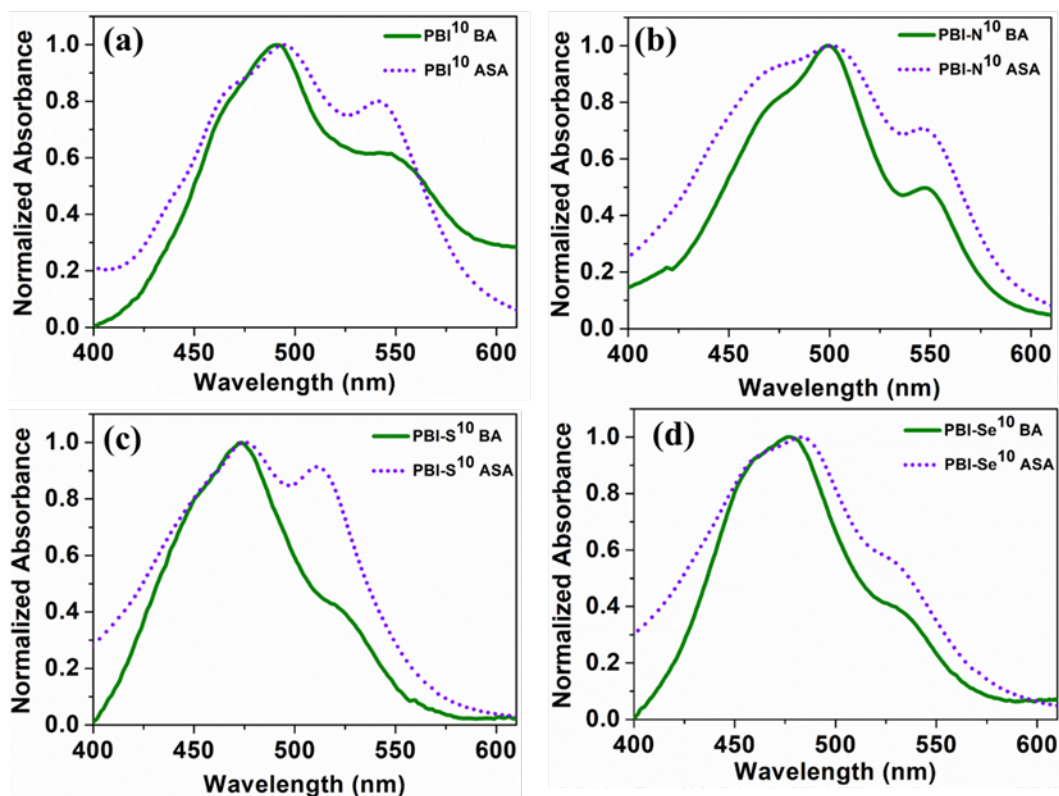

**Figure S20.** Overlay of the absorption spectra of drop casted thin films of PBIs before (solid line) and after (dotted line) solvent annealing.



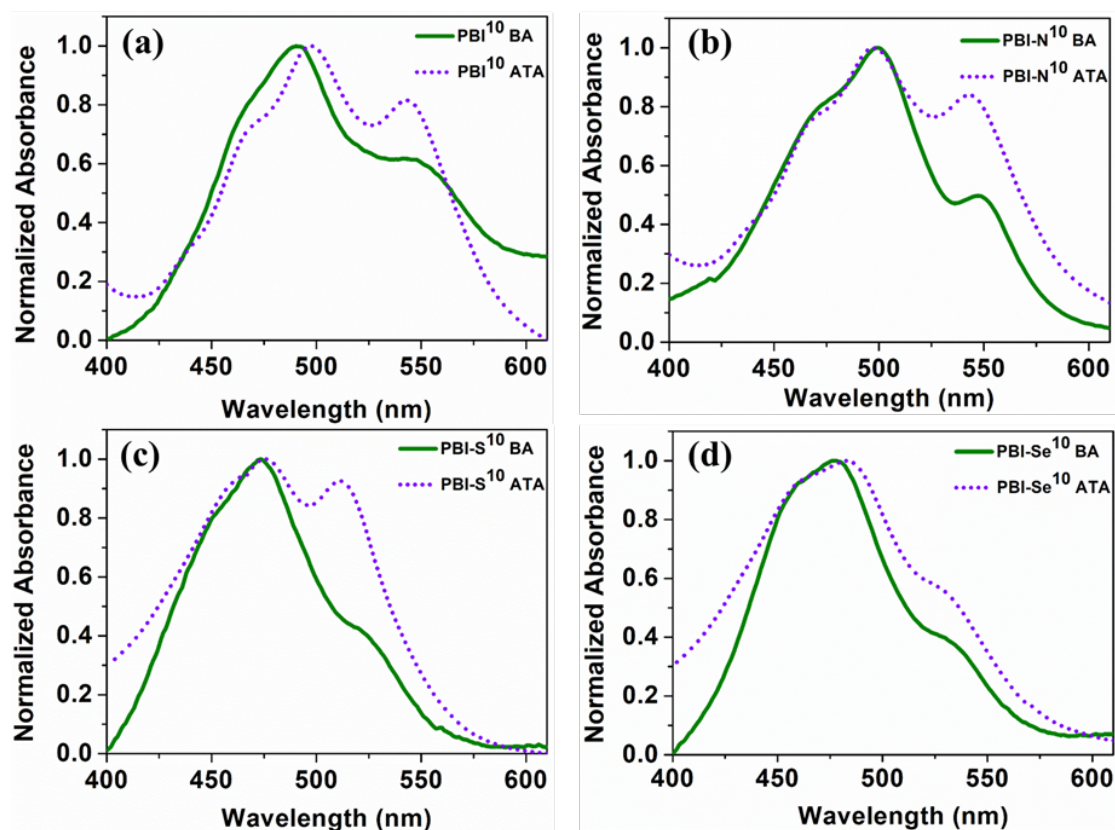

**Figure S21.** Overlay of the absorption spectra of drop casted thin films of PBIs before (solid line) and after (dotted line) thermal annealing.

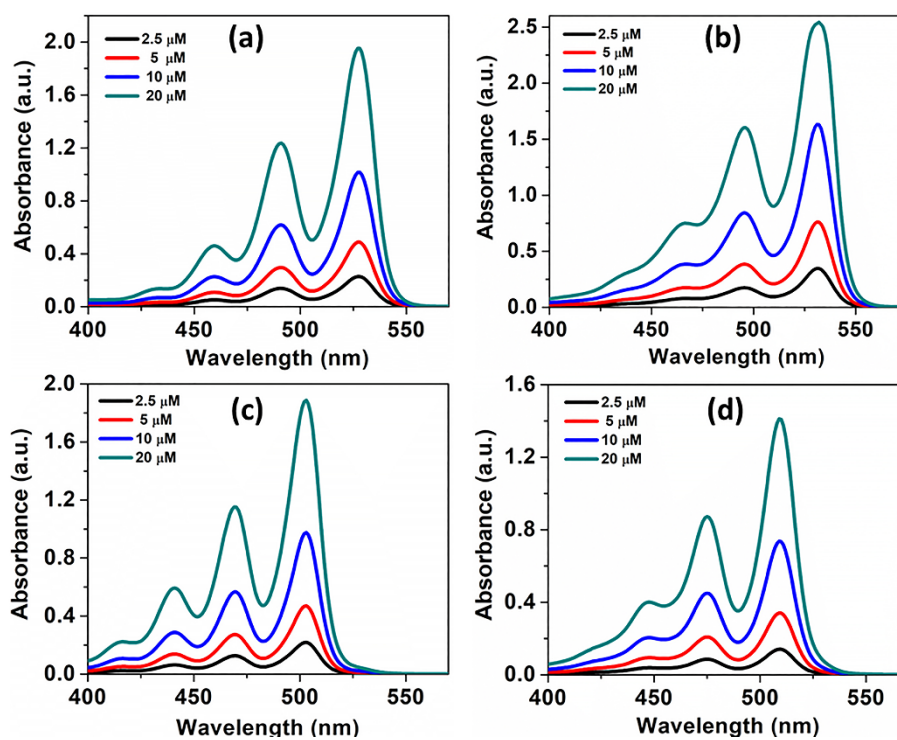

**Figure S22.** Absorption spectra of PBI<sup>10</sup> (a), PBI-N<sup>10</sup> (b), PBI-S<sup>10</sup> (c) and PBI-Se<sup>10</sup> (d) in chloroform solution as a function of concentration.

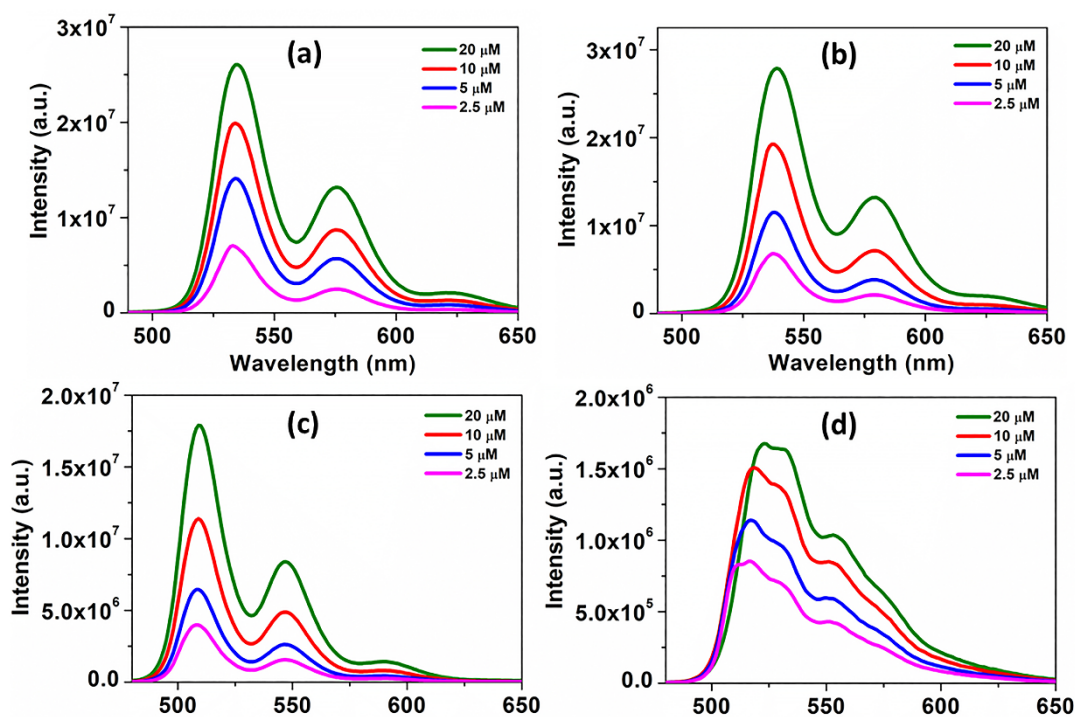

**Figure S23.** Emission Spectra of **PBI<sup>10</sup>** (a), **PBI-N<sup>10</sup>** (b), **PBI-S<sup>10</sup>** (c) and **PBI-Se<sup>10</sup>** (d) in chloroform solution as a function of concentration.

## 6. Quantum yield measurement (Relative)

Quantum yield was measured according to established procedure by using rhodamine 6g in ethanol as the standard. Absolute values were calculated according to the following equation:  $Q_S = Q_R \times (m_S / m_R) \times (n_S / n_R)^2$ , Where, Q: Quantum yield, m: Slope of the plot of integrated fluorescence intensity vs absorbance (Calculated from Fig.S22), n: refractive index (1.361 for ethanol and 1.001 for chloroform). The subscript R refers to the reference fluorophore i.e. rhodamine 6G solution in EtOH and subscript S refers to the sample under investigation. In order to minimize re-absorption effects, absorbance was kept below 0.15 at the excitation wavelength of 527, 532, 503 and 509 nm respectively for compounds PBI<sup>10</sup>, PBI-N<sup>10</sup>, PBI-S<sup>10</sup> and PBI-Se<sup>10</sup>. Quantum Yield of rhodamine 6g in EtOH is 0.95. Simplified equation for the calculation after substituting the appropriate values is given below and values obtained are given in table below.

$$Q_S = 0.95 \times (m_S / m_R) \times (1.001/1.361)^2 \\ = 0.513 \times (m_S / m_R)$$

| Compounds                  | $m_S$                    | $m_R$                   | $Q_S^{a,b,c}$ |
|----------------------------|--------------------------|-------------------------|---------------|
| <b>PBI<sup>10</sup></b>    | $8.44794 \times 10^8$    | $1.4208 \times 10^9$    | 0.62          |
| <b>PBI-N<sup>10</sup></b>  | $1.26959 \times 10^{10}$ | $1.5694 \times 10^{10}$ | 0.86          |
| <b>PBI-S<sup>10</sup></b>  | $5.10306 \times 10^8$    | $1.3867 \times 10^9$    | 0.39          |
| <b>PBI-Se<sup>10</sup></b> | $2.73086 \times 10^7$    | $1.3942 \times 10^9$    | 0.02          |

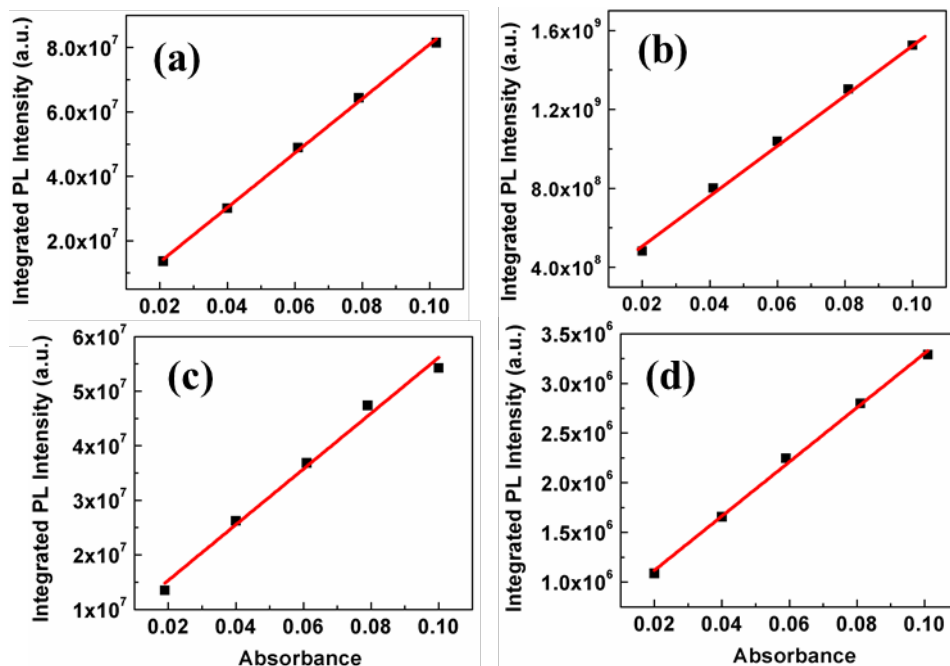

**Figure S24.** Plots of integrated photoluminescence intensity vs absorbance of reference compound **PBI<sup>10</sup>** (a), **PBI-N<sup>10</sup>** (b), **PBI-S<sup>10</sup>** (c) and **PBI-Se<sup>10</sup>** (d) respectively.

### 7. Time resolved photoluminescence studies

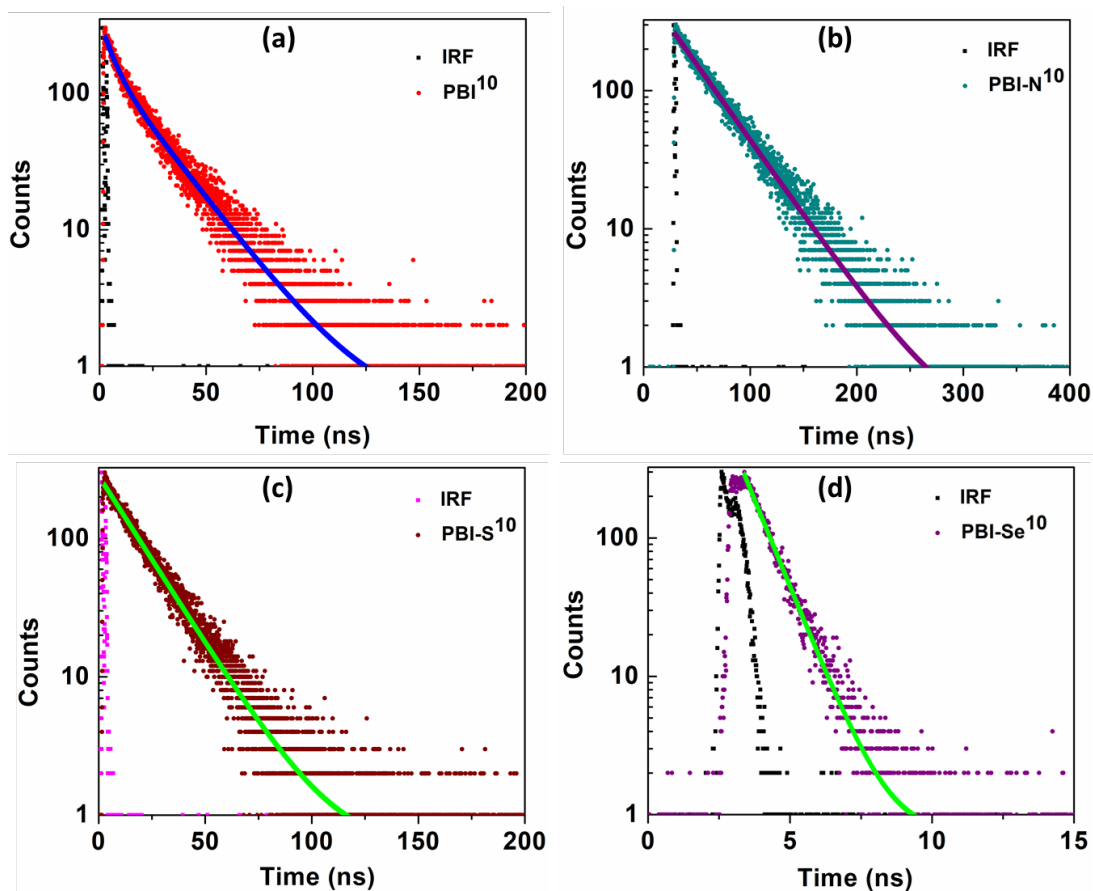

**Figure S25.** Fluorescence decay plots of compounds **PBI<sup>10</sup>** (a), **PBI-N<sup>10</sup>** (b), **PBI-S<sup>10</sup>** (c) and **PBI-Se<sup>10</sup>** (d) respectively. (IRF: Instrument response function).

**Table S1.** Data obtained from the time resolved photoluminescence experiments of compounds **PBI<sup>10</sup>**, **PBI-N<sup>10</sup>**, **PBI-S<sup>10</sup>** and **PBI-Se<sup>10</sup>** respectively.

| Sl no. | Compound                   | $\tau_1$ (ns) |
|--------|----------------------------|---------------|
| 1      | <b>PBI<sup>10</sup></b>    | 17.701        |
| 2      | <b>PBI-N<sup>10</sup></b>  | 39.693        |
| 3      | <b>PBI-S<sup>10</sup></b>  | 17.850        |
| 4      | <b>PBI-Se<sup>10</sup></b> | 0.859         |

## 8. Thermal behavior

**Table S2.** Phase transition temperatures ( $^{\circ}\text{C}$ ), corresponding enthalpies ( $\text{kJmol}^{-1}$ )<sup>a</sup> and decomposition temperatures obtained by TGA.

| Compounds                  | Phase Sequence (kJ/mol)           |                                   |                                                                          |
|----------------------------|-----------------------------------|-----------------------------------|--------------------------------------------------------------------------|
|                            | Second heating                    | First Cooling                     | Temperature at which 5 wt% decomposition occurred ( $^{\circ}\text{C}$ ) |
| <b>PBI<sup>10</sup></b>    | Col <sub>h</sub> 327.66 (7.82) I  | I 323.40 (7.84) Col <sub>h</sub>  | 346                                                                      |
| <b>PBI-N<sup>10</sup></b>  | Col <sub>h</sub> 338.86 (6.12) I  | I 334.32 (5.63) Col <sub>h</sub>  | 356                                                                      |
| <b>PBI-S<sup>10</sup></b>  | Col <sub>ob</sub> 349.23 (4.67) I | I 346.00 (3.67) Col <sub>ob</sub> | 349                                                                      |
| <b>PBI-Se<sup>10</sup></b> | Col <sub>h</sub> 343.63 (4.02) I  | I 334.76 (3.50) Col <sub>h</sub>  | 348                                                                      |

<sup>a</sup> Peak temperatures in the DSC thermograms obtained during the second heating and first cooling cycles at  $5^{\circ}\text{C min}^{-1}$ . Col<sub>h</sub> = Columnar hexagonal phase; Col<sub>ob</sub> = Columnar oblique phase; I = Isotropic phase.

## 9. XRD Studies

**Table S3.** Results of (*hkl*) indexation of XRD profiles of the compounds at a given temperature (T) of mesophases<sup>a</sup>

| Compounds (D/Å)                                      | Phase (T/ $^{\circ}\text{C}$ ) | $d_{\text{obs}}$ (Å) | $d_{\text{cal}}$ (Å) | Miller indices <i>hk</i> | Lattice parameters (Å), Lattice area S (Å <sup>2</sup> ), Molecular volume (Å <sup>3</sup> ) |
|------------------------------------------------------|--------------------------------|----------------------|----------------------|--------------------------|----------------------------------------------------------------------------------------------|
| <b>PBI<sup>10</sup></b><br>(44.8)<br><br>MW: 1384.17 | Col <sub>h</sub><br>(200)      | 28.11                | 28.11                | 10                       | $a = 32.46$                                                                                  |
|                                                      |                                | 16.16                | 16.23                | 11                       |                                                                                              |
|                                                      |                                | 14.64                | 14.06                | 20                       |                                                                                              |
|                                                      |                                | 4.85 ( $h_a$ )       |                      |                          |                                                                                              |
|                                                      | Col <sub>h</sub><br>(100)      | 27.74                | 27.74                | 10                       | $a = 32.03$                                                                                  |
|                                                      |                                | 16.33                | 16.02                | 11                       |                                                                                              |
|                                                      |                                | 13.90                | 13.87                | 20                       |                                                                                              |
|                                                      |                                | 4.65 ( $h_a$ )       |                      |                          |                                                                                              |
|                                                      |                                | 4.12 ( $h_c$ )       |                      |                          |                                                                                              |
|                                                      | Col <sub>h</sub><br>(28)       | 27.44                | 27.43                | 10                       | $a = 31.68$<br>$S = 869.2$<br>$V = 3584$                                                     |
|                                                      |                                | 15.79                | 15.84                | 11                       |                                                                                              |
|                                                      |                                | 13.71                | 13.72                | 20                       |                                                                                              |
|                                                      |                                | 4.60 ( $h_a$ )       |                      |                          |                                                                                              |
|                                                      |                                | 4.12 ( $h_c$ )       |                      |                          |                                                                                              |
| <b>PBI-N<sup>10</sup></b>                            | Col <sub>h</sub>               | 25.98                | 25.98                | 10                       | $a = 29.99$                                                                                  |

|                                                     |                            |                                                                                       |                                                           |                                           |                                                                                     |
|-----------------------------------------------------|----------------------------|---------------------------------------------------------------------------------------|-----------------------------------------------------------|-------------------------------------------|-------------------------------------------------------------------------------------|
| (44.6)<br>MW: 1425.22                               | (200)                      | 14.94<br>13.21<br>5.68( $h_a$ )<br>4.87 ( $h_c$ )<br>3.67<br>3.41                     | 15.00<br>12.99<br>--<br>--<br>3.71<br>3.33                | 11<br>20<br><br><br>53<br>54              |                                                                                     |
|                                                     | Col <sub>h</sub><br>(100)  | 25.53<br>14.58<br>13.11<br>5.19( $h_a$ )<br>4.63 ( $h_c$ )<br>3.66<br>3.38            | 25.53<br>14.74<br>12.76<br>-<br>-<br>3.63<br>3.22         | 10<br>11<br>20<br>--<br>--<br>44<br>54    | $a = 29.48$                                                                         |
|                                                     | Col <sub>h</sub><br>(25)   | 25.18<br>14.06<br>12.63<br>4.90 ( $h_a$ )<br>4.52 ( $h_c$ )<br>3.64<br>3.36           | 25.18<br>14.54<br>12.59<br><br><br>3.63<br>3.22           | 10<br>11<br>20<br>--<br>--<br>44<br>54    | $a = 29.08$<br>$S = 732.4$<br>$V = 3307.6$                                          |
| <b>PBI-S<sup>10</sup></b><br>(43.9)<br>MW: 1414.21  | Col <sub>ob</sub><br>(200) | 28.28<br>16.32<br>14.04<br>9.20<br>8.36<br>7.99<br>4.75 ( $h_a$ )<br>3.99 ( $h_c$ )   | 28.28<br>16.32<br>14.14<br>9.23<br>8.16<br>7.87           | 10<br>11<br>02<br>30<br>22<br>13          | $a = 31.39$<br>$b = 32.04$<br>$\gamma = 61.95^\circ$                                |
|                                                     | Col <sub>ob</sub><br>(100) | 27.67<br>26.18<br>15.96<br>15.03<br>13.57<br>4.63 ( $h_a$ )<br>3.98 ( $h_c$ )<br>3.49 | 27.67<br>26.18<br>15.96<br>15.14<br>13.84<br><br><br>3.52 | 10<br>01<br>11<br>-21<br>20<br><br><br>45 | $a = 30.50$<br>$b = 28.86$<br>$\gamma = 65.15^\circ$                                |
|                                                     | Col <sub>ob</sub><br>(28)  | 27.31<br>25.68<br>15.02<br>13.38<br>4.60 ( $h_a$ )<br>4.0 ( $h_c$ )<br>3.47           | 27.31<br>25.68<br>15.02<br>13.66<br><br><br>3.35          | 10<br>01<br>11<br>20<br><br><br>54        | $a = 32.81$<br>$b = 30.85$<br>$\gamma = 56.4^\circ$<br>$S = 842.68$<br>$V = 3365.3$ |
| <b>PBI-Se<sup>10</sup></b><br>(44.6)<br>MW: 1461.13 | Col <sub>h</sub><br>(200)  | 28.30<br>16.30<br>14.08<br>5.90<br>4.82 ( $h_a$ )                                     | 28.30<br>16.34<br>14.15                                   | 10<br>11<br>20                            | $a = 32.68$                                                                         |
|                                                     | Col <sub>h</sub><br>(100)  | 28.00<br>16.14<br>13.93<br>4.65 ( $h_a$ )<br>3.73 ( $h_c$ )                           | 28.01<br>16.17<br>14.00                                   | 10<br>11<br>20                            | $a = 32.34$                                                                         |
|                                                     | Col <sub>h</sub><br>(28)   | 27.58<br>15.89<br>13.71                                                               | 27.58<br>15.93<br>13.79                                   | 10<br>11<br>20                            | $a = 31.85$<br>$S = 878.5$<br>$V = 3660.2$                                          |

|                                                                                                                                                                                                                                                                                                                                                                                                                                                                                                                                                                               |  |                                           |      |    |  |
|-------------------------------------------------------------------------------------------------------------------------------------------------------------------------------------------------------------------------------------------------------------------------------------------------------------------------------------------------------------------------------------------------------------------------------------------------------------------------------------------------------------------------------------------------------------------------------|--|-------------------------------------------|------|----|--|
|                                                                                                                                                                                                                                                                                                                                                                                                                                                                                                                                                                               |  | 4.56<br>4.176 ( $h_a$ )<br>3.74 ( $h_c$ ) | 3.83 | 62 |  |
| <sup>a</sup> The diameter (D) of the disk (estimated from Chem 3D Pro 8.0 molecular model software from Cambridge Soft). $d_{obs}$ : spacing observed; $d_{cal}$ : spacing calculated (deduced from the lattice parameters; $a$ for Col <sub>h</sub> phase; $a$ , $b$ for Col <sub>ob</sub> phase; $\gamma$ is the tilt angle for Col <sub>ob</sub> phase; $c$ is height of the unit cell). The spacings marked $h_a$ and $h_c$ correspond to diffuse reflections in the wide-angle region arising from correlations between the alkyl chains and core regions, respectively. |  |                                           |      |    |  |

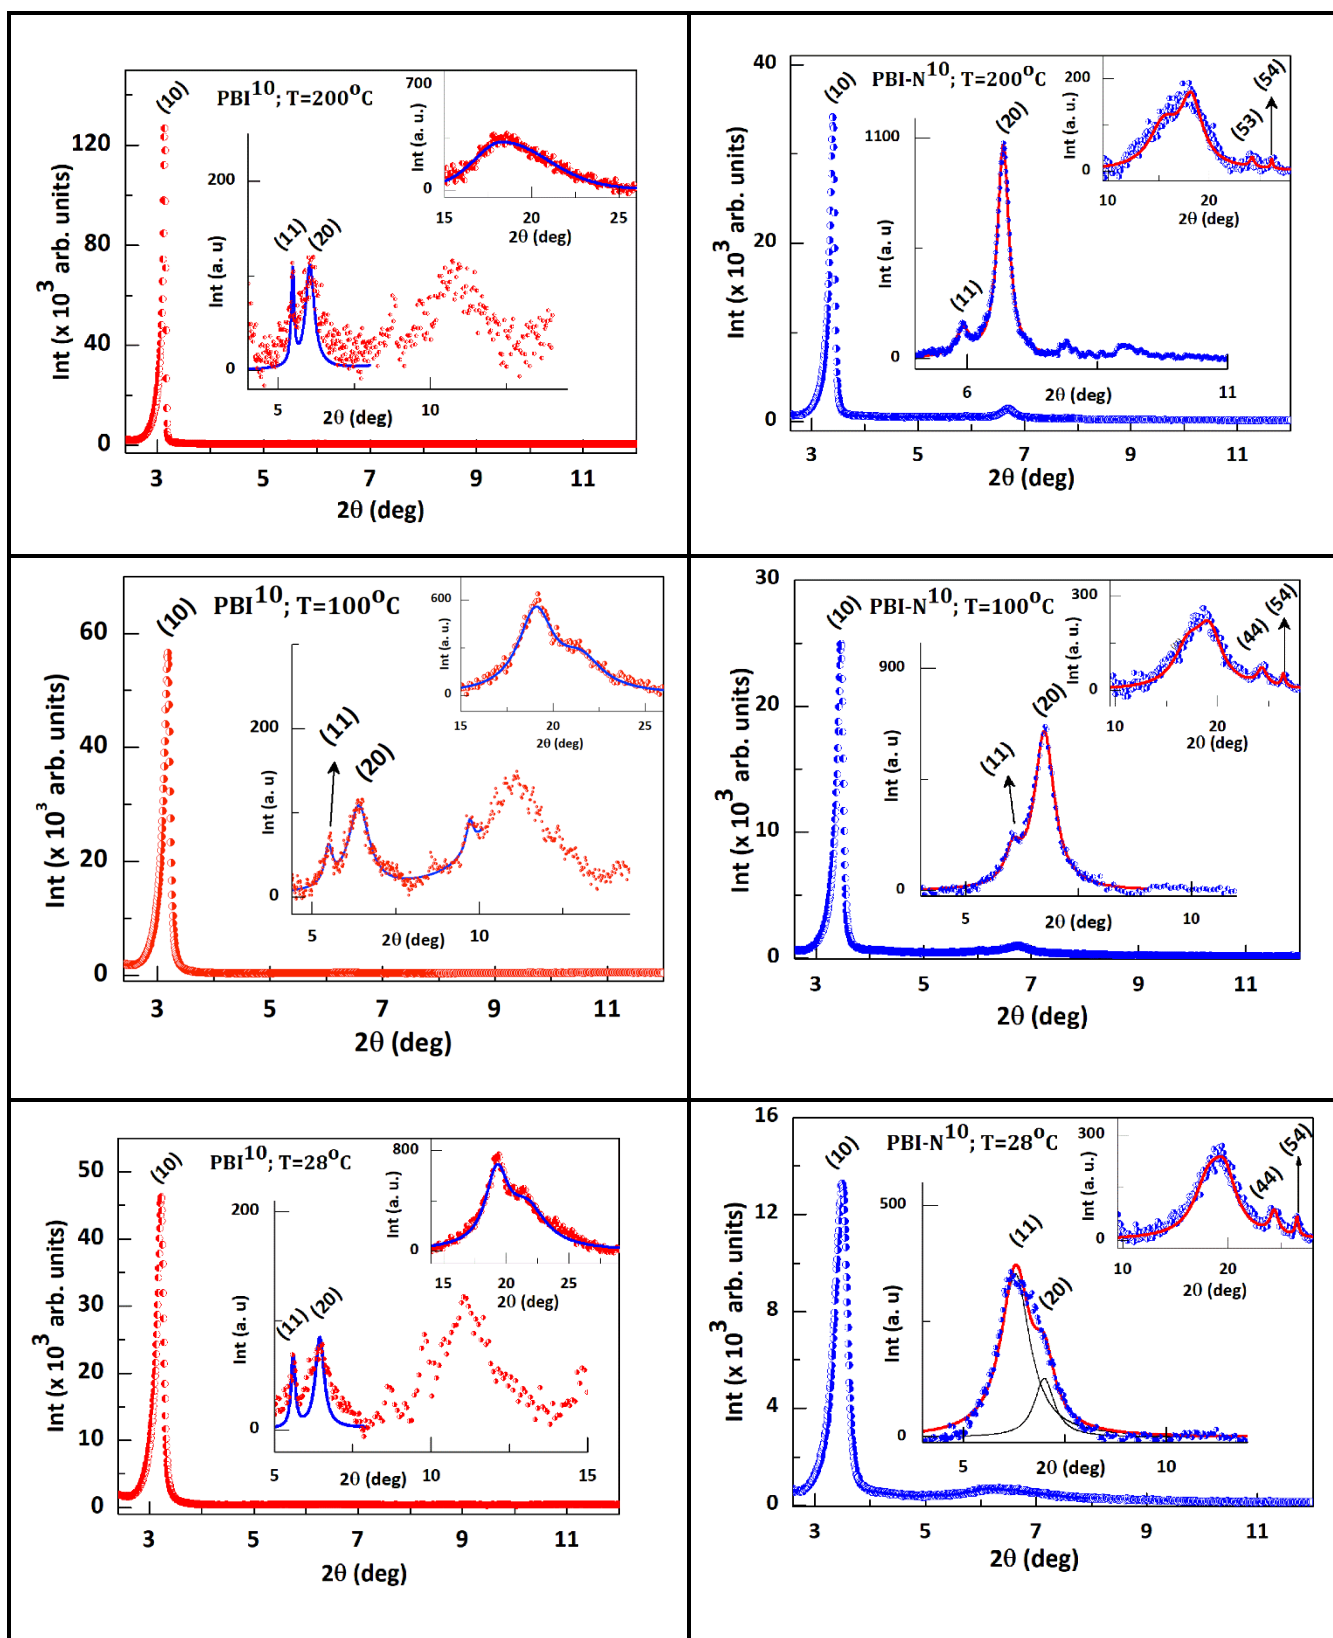

**Figure S26.** XRD pattern obtained for compound **PBI<sup>10</sup>** (left) and **PBI-N<sup>10</sup>** (right) at different temperature intervals.

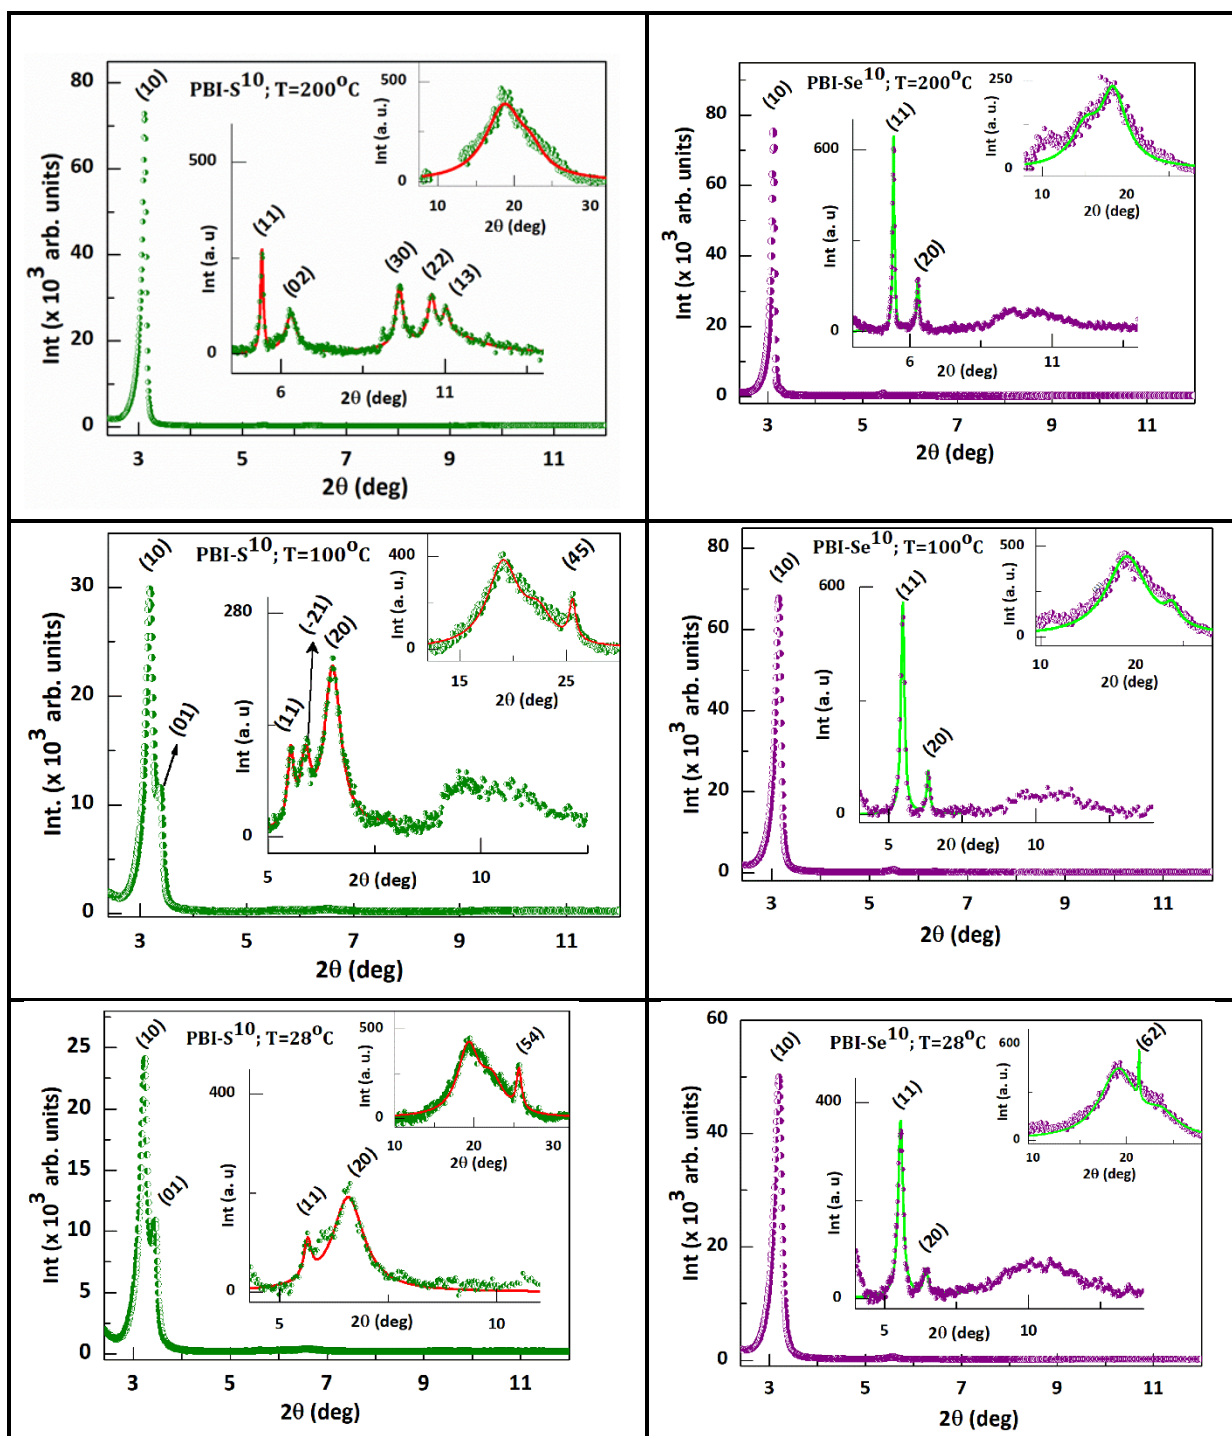

**Figure S27.** XRD pattern obtained for compound **PBI-S<sup>10</sup>** (left) and **PBI-Se<sup>10</sup>** (right) at different temperature intervals.

## 10. Device Fabrication and Characterizations

Based on superior photophysical and electrochemical properties, the electroluminescent properties of **PBI-N<sup>10</sup>**, **PBI<sup>10</sup>**, **PBI-S<sup>10</sup>**, and **PBI-Se<sup>10</sup>** emitter materials. Multi-layered solution processed OLEDs were fabricated consisting of following device configurations: indium tin-oxide (ITO)/ PEDOT:PSS (35 nm)/ PVK (20 nm)/ **PBI-N<sup>10</sup>** or **PBI<sup>10</sup>** or **PBI-S<sup>10</sup>**, or **PBI-Se<sup>10</sup>**



(20 nm)/ TPBi (40 nm)/ LiF (0.5 nm)/ Al (200 nm) for non-doped device and ITO/PEDOT:PSS (35 nm)/ PVK (20 nm)/ CBP: **PBI-N<sup>10</sup>** or **PBI<sup>10</sup>** or **PBI-S<sup>10</sup>**, or **PBI-Se<sup>10</sup>** (1,3 and 5 wt%) (20 nm)/ TPBi (40 nm)/ LiF (0.5 nm)/ Al (200 nm) for doped device. Initially, ITO-coated glass substrates were cleaned to remove greasy layer. The cleaning process was carried-out with soap-solution, deionized water, acetone, and alcohol in water-bath sonicator at optimized time. Cleaned substrates were kept in ultra-violet ozone system to expose in UV-light for removing residual solvents and further impurities. Then, these substrates were transferred into nitrogen purged glovebox for further processing of layers. Simultaneously, the PVK for HTM and CBP as host and newly synthesized emitters for emissive solution layer were dispersed into suitable solvents with water-bath sonicator. Prepared solutions were filtered with 0.45  $\mu\text{m}$  PTFE filters and mixed in desired ratio to prepare emissive layer. First, a hole-injection layer was prepared by spin-coating an aqueous solution of PEDOT:PSS at 4,000 rpm for 20 s. Subsequently, these substrates were annealed at 130 °C for 15 minutes. Then, a solution of HTM was spin-coated onto hole-injection layer to form a thin-layer of hole transport layer. After that, these samples were treated by 70 °C for 30 minutes to remove the solvent. After cooled down the substrates, neat solution or emissive layer solution were spin-coated onto hole-transport layer at 2,500 rpm for 20 s. Then, these substrates were transferred into thermal evaporator to deposit subsequent layers. Then, TPBi was deposited as an electron-transport layer followed by the deposition of 0.5 nm LiF as an electron-injection layer and 200 nm Al as a cathode. All the layers of TPBi, LiF and Al were deposited subsequently via thermal evaporation method at base pressure of  $4.0 \times 10^{-6}$  Torr. After that, Fabricated devices were kept in the mini vacuum chamber during testing process and then measured at room temperature conditions. To analyse the device, the electroluminescence (EL) spectrum, luminance, and the CIE coordinates were obtained using a photo research (PR-655) spectrometer. The current density-voltage-luminance (J-V-L) characteristics were obtained by a computer mounted voltmeter (Keithley 2400) and spectrophotometer CS-100 Minolta. Lifetime measurement was carried-out with computer mounted Lifetime Test System. Lifetime was investigated without encapsulation of devices.

**Table S4.** Effect of doping concentration on the operation voltage ( $V_{on}$ ), power efficacy (PE), current efficacy (CE), external quantum efficacy (EQE), CIE coordinates, and maximum luminance of solution-processed deep-red/NIR OLED devices with the CBP host for **PBI-N<sup>10</sup>**, **PBI<sup>10</sup>**, **PBI-S<sup>10</sup>**, and **PBI-Se<sup>10</sup>**.

| Hosts                | Dopant Concn. (wt%) | $V_{on}$ (V) | Power efficacy (lm/W) |                       |                         | Current efficacy (cd/A) |                       |                         | External quantum efficiency (%) |                       |                         | CIE <sub>xy</sub> @100 cd/m <sup>2</sup> | $L_{max}$ cd/m <sup>2</sup> |
|----------------------|---------------------|--------------|-----------------------|-----------------------|-------------------------|-------------------------|-----------------------|-------------------------|---------------------------------|-----------------------|-------------------------|------------------------------------------|-----------------------------|
|                      |                     |              | Max.                  | 100 cd/m <sup>2</sup> | 1,000 cd/m <sup>2</sup> | Max.                    | 100 cd/m <sup>2</sup> | 1,000 cd/m <sup>2</sup> | Max.                            | 100 cd/m <sup>2</sup> | 1,000 cd/m <sup>2</sup> |                                          |                             |
| PBI-N <sup>10</sup>  | 1.0                 | 3.0          | 7.2                   | 4.0                   | 2.4                     | 6.9                     | 5.3                   | 4.2                     | 4.9                             | 4.4                   | 3.2                     | (0.46,0.32)                              | 2,900                       |
|                      | 3.0                 | 3.2          | 2.1                   | 1.3                   | 0.8                     | 2.3                     | 2.0                   | 1.6                     | 2.9                             | 2.9                   | 1.7                     | (0.54,0.30)                              | 1,820                       |
|                      | 5.0                 | 3.5          | 0.6                   | 0.4                   | 0.5                     | 1.1                     | 0.8                   | 1.0                     | 1.9                             | 1.3                   | 1.2                     | (0.52,0.27)                              | 1294                        |
|                      | 100                 | 3.6          | 0.6                   | 0.3                   | -                       | 0.7                     | 0.5                   | -                       | 0.9                             | 0.9                   | -                       | (0.52,0.27)                              | 676                         |
| PBI <sup>10</sup>    | 1.0                 | 3.0          | 2.4                   | 1.8                   | 0.8                     | 2.7                     | 2.7                   | 1.6                     | 4.3                             | 4.3                   | 1.8                     | (0.44,0.28)                              | 1,366                       |
|                      | 3.0                 | 3.6          | 0.9                   | 0.8                   | -                       | 1.3                     | 1.3                   | -                       | 2.9                             | 2.9                   | -                       | (0.39,0.20)                              | 886                         |
|                      | 5.0                 | 3.7          | 0.5                   | 0.4                   | -                       | 0.6                     | 0.6                   | -                       | 2.0                             | 1.8                   | -                       | (0.33,0.16)                              | 612                         |
|                      | 100                 | 4.0          | 0.2                   | 0.1                   | -                       | 0.4                     | 0.3                   | -                       | 0.9                             | 0.8                   | -                       | (0.33,0.15)                              | 294                         |
| PBI-S <sup>10</sup>  | 1.0                 | 3.3          | 1.3                   | 0.8                   | -                       | 1.3                     | 1.3                   | -                       | 2.1                             | 2.0                   | -                       | (0.43,0.25)                              | 683                         |
|                      | 3.0                 | 3.8          | 0.5                   | 0.3                   | -                       | 0.6                     | 0.6                   | -                       | 1.4                             | 1.4                   | -                       | (0.39,0.20)                              | 443                         |
|                      | 5.0                 | 4.0          | 0.2                   | 0.2                   | -                       | 0.3                     | 0.3                   | -                       | 0.9                             | 0.9                   | -                       | (0.33,0.16)                              | 306                         |
|                      | 100                 | 4.1          | 0.2                   | 0.1                   | -                       | 0.3                     | 0.3                   | -                       | 0.8                             | 0.8                   | -                       | (0.33,0.16)                              | 293                         |
| PBI-Se <sup>10</sup> | 1.0                 | 4.0          | 1.2                   | 1.2                   | -                       | 1.4                     | 1.3                   | -                       | 1.6                             | 1.6                   | -                       | (0.40,0.23)                              | 210                         |
|                      | 3.0                 | 4.1          | 0.7                   | 0.7                   | -                       | 1.1                     | 1.1                   | -                       | 1.6                             | 1.6                   | -                       | (0.40,0.23)                              | 191                         |
|                      | 5.0                 | 4.2          | 0.6                   | 0.4                   | -                       | 0.8                     | 0.8                   | -                       | 1.5                             | 1.5                   | -                       | (0.40,0.23)                              | 140                         |
|                      | 100                 | 4.0          | 0.3                   | 0.2                   | -                       | 0.3                     | 0.3                   | -                       | 0.9                             | 0.9                   | -                       | (0.33,0.16)                              | 177                         |

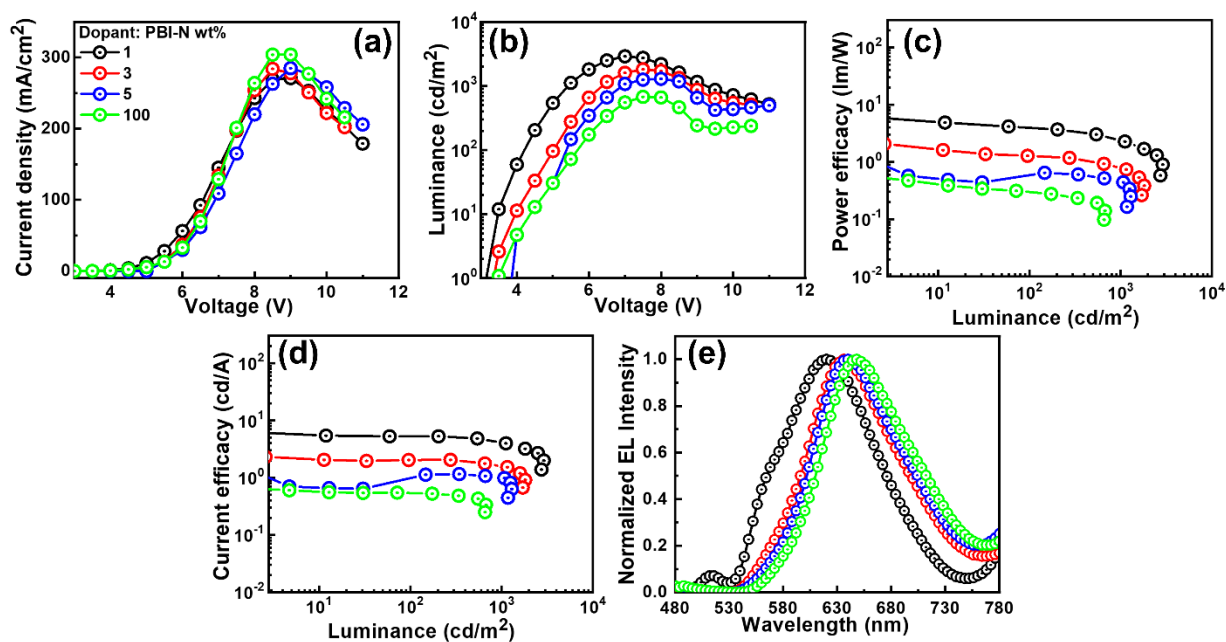

**Figure S28.** (a) Current density-voltage, (b) luminance-voltage, (c) power efficacy-luminance, (d) current efficacy-luminance, and (e) EL spectra curves of the solution-processed deep-red/NIR OLED using CBP host with 1, 3, 5, and 100 wt% PBI-N<sup>10</sup> concentration.

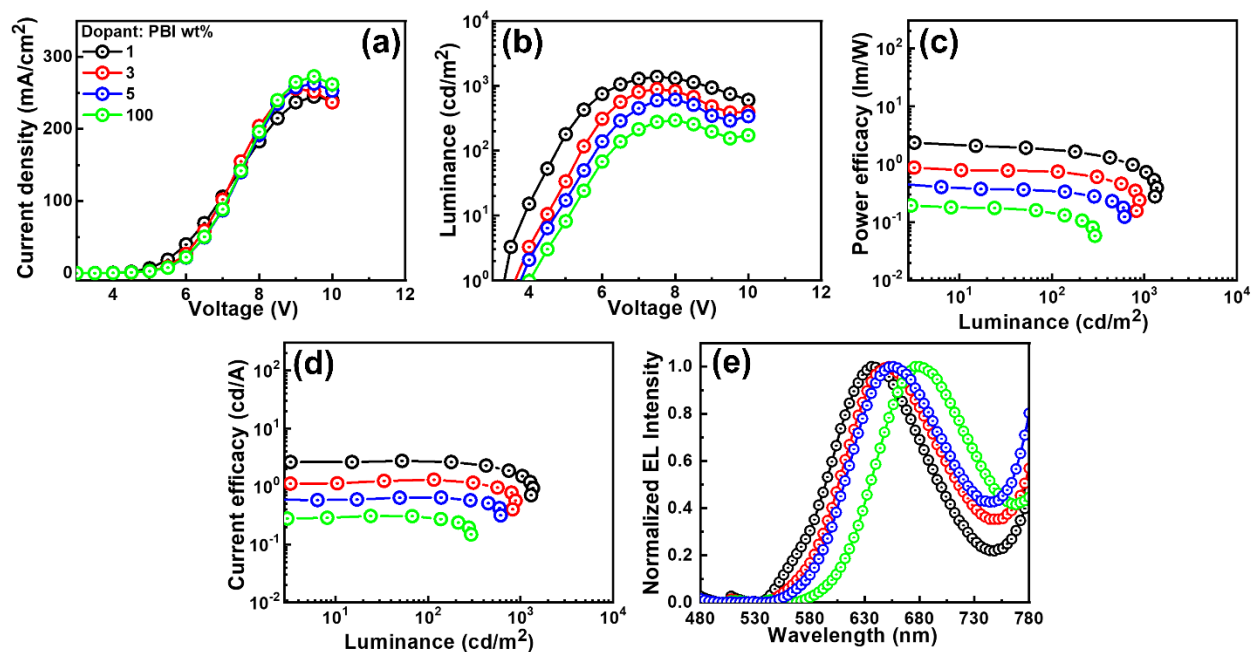

**Figure S29.** (a) Current density-voltage, (b) luminance-voltage, (c) power efficacy-luminance, (d) current efficacy-luminance, and (e) EL spectra curves of the solution-processed deep-red/NIR OLED using CBP host with 1, 3, 5, and 100 wt% PBI<sup>10</sup> concentration.

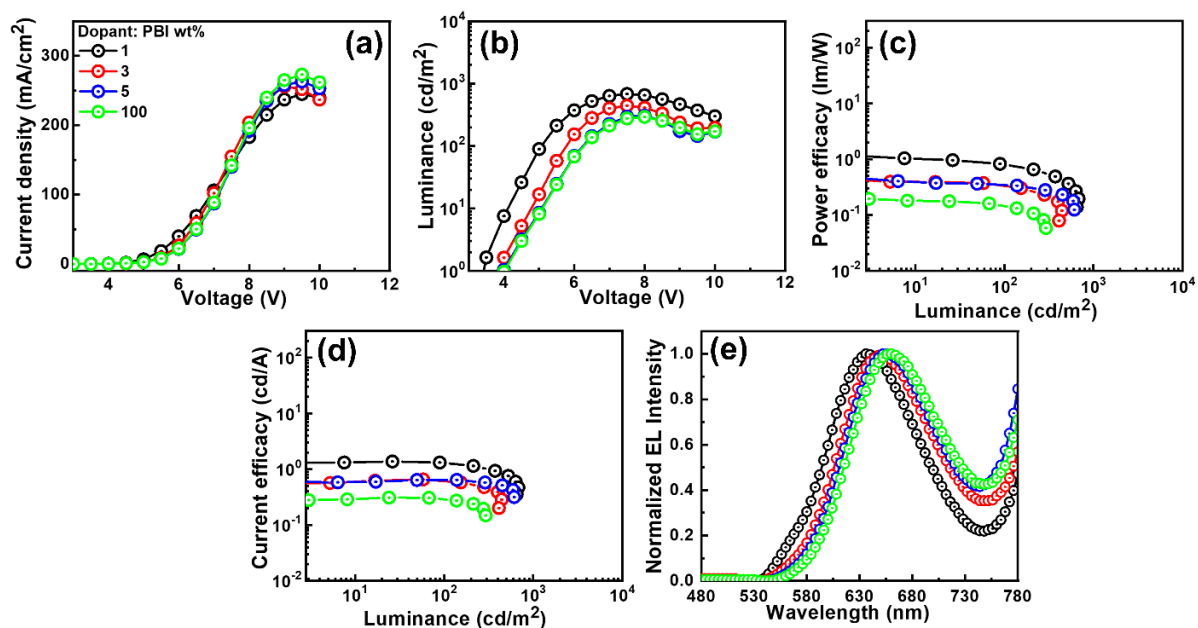

**Figure S30.** (a) Current density-voltage, (b) luminance-voltage, (c) power efficacy-luminance, (d) current efficacy-luminance, and (e) EL spectra curves of the solution-processed deep-red/NIR OLED using CBP host with 1, 3, 5, and 100 wt% PBI-S<sup>10</sup> concentration.

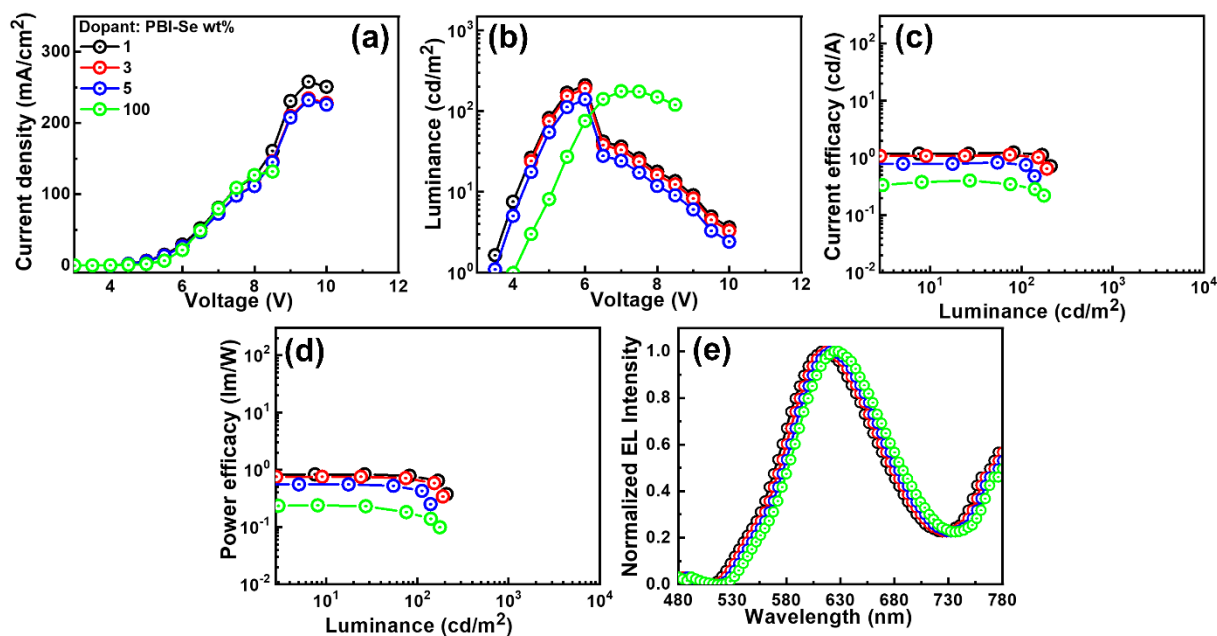

**Figure S31.** (a) Current density-voltage, (b) luminance-voltage, (c) power efficacy-luminance, (d) current efficacy-luminance, and (e) EL spectra curves of the solution-processed deep-red/NIR OLED using CBP host with 1, 3, 5, and 100 wt% PBI-Se<sup>10</sup> concentration.

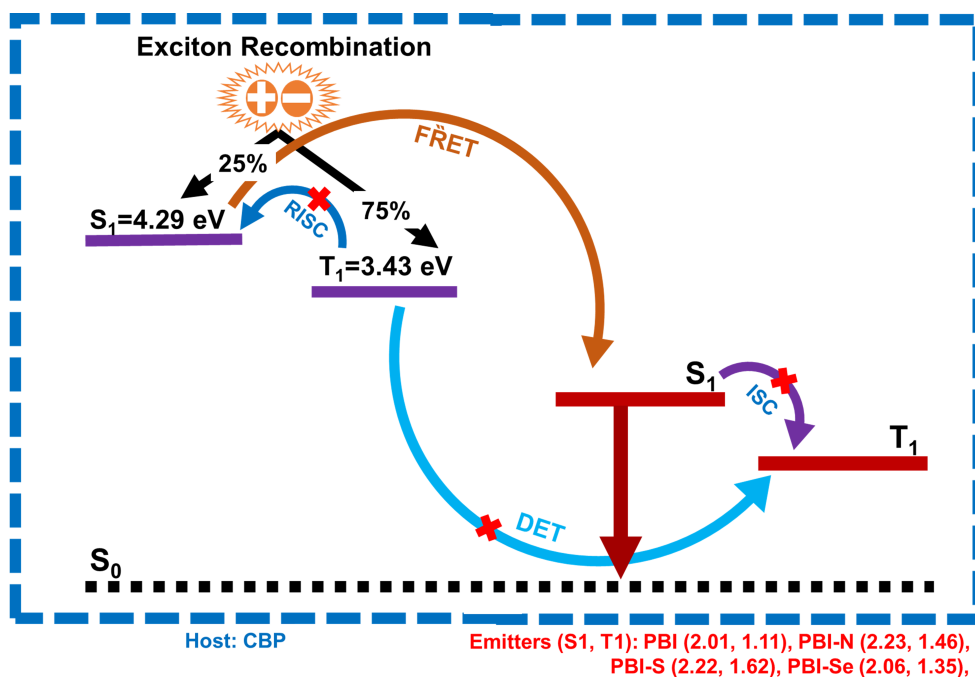

Figure S32. Energy-transfer routes from host-to-guest.

## 11. DFT Studies

To understand the electronic properties and frontier molecular orbital energy level of compounds **PBI**<sup>10</sup>, **PBI-N**<sup>10</sup>, **PBI-S**<sup>10</sup> and **PBI-Se**<sup>10</sup>, computational studies was carried out in B3LYP/6-31g (dp) method using Gaussian 09 program package.<sup>S4</sup> The absence of imaginary frequency ensured the energy minimized structure of all the compounds.

DFT calculation data for **PBI**<sup>10</sup> :

| Center No. | Atomic No. | Atomic Type | Coordinates (Angstroms) |           |           |
|------------|------------|-------------|-------------------------|-----------|-----------|
|            |            |             | X                       | Y         | Z         |
| 1          | 6          | 0           | -2.589292               | 2.134638  | 1.696953  |
| 2          | 6          | 0           | -1.199175               | 2.050152  | 1.565907  |
| 3          | 6          | 0           | -0.588688               | 1.054871  | 0.800161  |
| 4          | 6          | 0           | -1.419109               | 0.097550  | 0.135523  |
| 5          | 6          | 0           | -2.838853               | 0.191309  | 0.275746  |
| 6          | 6          | 0           | -3.411342               | 1.220073  | 1.061828  |
| 7          | 6          | 0           | -0.865884               | -0.951253 | -0.665809 |
| 8          | 6          | 0           | -1.738038               | -1.849569 | -1.283720 |
| 9          | 6          | 0           | -3.125912               | -1.750672 | -1.140266 |
| 10         | 6          | 0           | -3.682221               | -0.744032 | -0.370326 |
| 11         | 6          | 0           | 0.871477                | 0.958858  | 0.655382  |
| 12         | 6          | 0           | 1.424704                | -0.090027 | -0.145844 |
| 13         | 6          | 0           | 0.594279                | -1.047348 | -0.810476 |
| 14         | 6          | 0           | 1.743656                | 1.857158  | 1.273287  |
| 15         | 6          | 0           | 3.131541                | 1.758127  | 1.129981  |
| 16         | 6          | 0           | 3.687857                | 0.751281  | 0.360312  |
| 17         | 6          | 0           | 2.844461                | -0.184035 | -0.285760 |
| 18         | 6          | 0           | 3.416944                | -1.213181 | -1.071344 |
| 19         | 6          | 0           | 2.594887                | -2.127697 | -1.706526 |

|    |   |   |            |            |           |
|----|---|---|------------|------------|-----------|
| 20 | 6 | 0 | 1.204753   | -2.042853  | -1.575936 |
| 21 | 6 | 0 | -5.158761  | -0.667870  | -0.240822 |
| 22 | 7 | 0 | -5.671004  | 0.381303   | 0.551090  |
| 23 | 6 | 0 | -4.882359  | 1.340439   | 1.220021  |
| 24 | 6 | 0 | 5.164426   | 0.674734   | 0.231274  |
| 25 | 7 | 0 | 5.676671   | -0.375094  | -0.559780 |
| 26 | 6 | 0 | 4.887986   | -1.334165  | -1.228750 |
| 27 | 8 | 0 | -5.394217  | 2.222016   | 1.891775  |
| 28 | 8 | 0 | -5.901158  | -1.467778  | -0.787982 |
| 29 | 8 | 0 | 5.906859   | 1.474396   | 0.778745  |
| 30 | 8 | 0 | 5.399848   | -2.216321  | -1.899740 |
| 31 | 6 | 0 | -7.109085  | 0.481701   | 0.682817  |
| 32 | 6 | 0 | 7.114796   | -0.476815  | -0.690009 |
| 33 | 6 | 0 | -7.790361  | 1.532311   | 0.080931  |
| 34 | 6 | 0 | -9.177291  | 1.645989   | 0.205361  |
| 35 | 6 | 0 | -9.902246  | 0.670697   | 0.932328  |
| 36 | 6 | 0 | -9.203135  | -0.409161  | 1.520544  |
| 37 | 6 | 0 | -7.809689  | -0.475470  | 1.401833  |
| 38 | 6 | 0 | 7.794451   | -1.527289  | -0.086086 |
| 39 | 6 | 0 | 9.181382   | -1.642519  | -0.208928 |
| 40 | 6 | 0 | 9.908029   | -0.668980  | -0.936561 |
| 41 | 6 | 0 | 9.210564   | 0.410827   | -1.526844 |
| 42 | 6 | 0 | 7.817067   | 0.478770   | -1.409515 |
| 43 | 6 | 0 | -12.987749 | -12.633309 | 1.022455  |
| 44 | 6 | 0 | -12.910464 | -11.359000 | 1.868758  |
| 45 | 6 | 0 | -12.222735 | -10.193419 | 1.147502  |
| 46 | 6 | 0 | -12.143612 | -8.911090  | 1.984887  |
| 47 | 6 | 0 | -11.456671 | -7.747387  | 1.259897  |
| 48 | 6 | 0 | -11.380132 | -6.461263  | 2.092000  |
| 49 | 6 | 0 | -10.697970 | -5.299781  | 1.358861  |
| 50 | 6 | 0 | -10.624175 | -4.007908  | 2.182474  |
| 51 | 6 | 0 | -9.952266  | -2.850990  | 1.433787  |
| 52 | 6 | 0 | -9.876173  | -1.551784  | 2.262814  |
| 53 | 6 | 0 | -21.317810 | -2.319049  | -4.076554 |
| 54 | 6 | 0 | -20.568556 | -1.570327  | -2.970251 |
| 55 | 6 | 0 | -19.044445 | -1.707858  | -3.070494 |
| 56 | 6 | 0 | -18.284814 | -0.963983  | -1.965391 |
| 57 | 6 | 0 | -16.761099 | -1.103555  | -2.068488 |
| 58 | 6 | 0 | -15.998135 | -0.364297  | -0.962337 |
| 59 | 6 | 0 | -14.475138 | -0.509358  | -1.069321 |
| 60 | 6 | 0 | -13.706147 | 0.221488   | 0.038374  |
| 61 | 6 | 0 | -12.184829 | 0.067478   | -0.076323 |
| 62 | 6 | 0 | -11.413495 | 0.788297   | 1.048307  |
| 63 | 6 | 0 | -12.575183 | 13.925582  | 1.566069  |
| 64 | 6 | 0 | -12.556292 | 12.698571  | 0.649555  |
| 65 | 6 | 0 | -11.914346 | 11.466477  | 1.298970  |
| 66 | 6 | 0 | -11.890224 | 10.232917  | 0.388260  |
| 67 | 6 | 0 | -11.247731 | 9.001525   | 1.038463  |
| 68 | 6 | 0 | -11.219164 | 7.769409   | 0.125651  |
| 69 | 6 | 0 | -10.577292 | 6.537896   | 0.776396  |
| 70 | 6 | 0 | -10.539651 | 5.309401   | -0.141063 |
| 71 | 6 | 0 | -9.897850  | 4.079129   | 0.511067  |
| 72 | 6 | 0 | -9.837249  | 2.857950   | -0.429142 |
| 73 | 6 | 0 | 12.501483  | -13.949899 | -1.509546 |
| 74 | 6 | 0 | 12.492770  | -12.717238 | -0.600493 |
| 75 | 6 | 0 | 11.864003  | -11.482928 | -1.258540 |

|     |   |   |            |            |           |
|-----|---|---|------------|------------|-----------|
| 76  | 6 | 0 | 11.849431  | -10.243981 | -0.354969 |
| 77  | 6 | 0 | 11.218737  | -9.010697  | -1.013092 |
| 78  | 6 | 0 | 11.198070  | -7.773817  | -0.106533 |
| 79  | 6 | 0 | 10.565526  | -6.541001  | -0.763914 |
| 80  | 6 | 0 | 10.533337  | -5.308684  | 0.148614  |
| 81  | 6 | 0 | 9.897524   | -4.077912  | -0.508424 |
| 82  | 6 | 0 | 9.839320   | -2.854064  | 0.428462  |
| 83  | 6 | 0 | 21.320714  | 2.318150   | 4.080419  |
| 84  | 6 | 0 | 20.572004  | 1.568204   | 2.974578  |
| 85  | 6 | 0 | 19.047919  | 1.707529   | 3.072726  |
| 86  | 6 | 0 | 18.288836  | 0.962452   | 1.968056  |
| 87  | 6 | 0 | 16.765145  | 1.103784   | 2.069081  |
| 88  | 6 | 0 | 16.002737  | 0.363357   | 0.963328  |
| 89  | 6 | 0 | 14.479760  | 0.510108   | 1.068286  |
| 90  | 6 | 0 | 13.711337  | -0.221846  | -0.039073 |
| 91  | 6 | 0 | 12.190035  | -0.066239  | 0.073659  |
| 92  | 6 | 0 | 11.419298  | -0.788092  | -1.050719 |
| 93  | 6 | 0 | 13.010927  | 12.630406  | -1.037811 |
| 94  | 6 | 0 | 12.932927  | 11.355291  | -1.882832 |
| 95  | 6 | 0 | 12.242440  | 10.191530  | -1.161275 |
| 96  | 6 | 0 | 12.162575  | 8.908403   | -1.997365 |
| 97  | 6 | 0 | 11.472956  | 7.746501   | -1.272029 |
| 98  | 6 | 0 | 11.395676  | 6.459567   | -2.102811 |
| 99  | 6 | 0 | 10.711003  | 5.299841   | -1.369234 |
| 100 | 6 | 0 | 10.636479  | 4.007141   | -2.191482 |
| 101 | 6 | 0 | 9.962301   | 2.851915   | -1.442224 |
| 102 | 6 | 0 | 9.885518   | 1.551849   | -2.269835 |
| 103 | 1 | 0 | -3.046644  | 2.914859   | 2.295211  |
| 104 | 1 | 0 | -0.596825  | 2.788086   | 2.081159  |
| 105 | 1 | 0 | -1.349019  | -2.653812  | -1.895893 |
| 106 | 1 | 0 | -3.788684  | -2.457401  | -1.627188 |
| 107 | 1 | 0 | 1.354653   | 2.661451   | 1.885404  |
| 108 | 1 | 0 | 3.794324   | 2.464806   | 1.616961  |
| 109 | 1 | 0 | 3.052249   | -2.908206  | -2.304401 |
| 110 | 1 | 0 | 0.602390   | -2.780814  | -2.091133 |
| 111 | 1 | 0 | -7.236084  | 2.278099   | -0.480449 |
| 112 | 1 | 0 | -7.269678  | -1.295305  | 1.865416  |
| 113 | 1 | 0 | 7.238888   | -2.271734  | 0.475801  |
| 114 | 1 | 0 | 7.278345   | 1.298564   | -1.874666 |
| 115 | 1 | 0 | -13.481142 | -13.446358 | 1.564949  |
| 116 | 1 | 0 | -13.550437 | -12.461218 | 0.097856  |
| 117 | 1 | 0 | -11.988054 | -12.981700 | 0.738808  |
| 118 | 1 | 0 | -12.374588 | -11.572563 | 2.803653  |
| 119 | 1 | 0 | -13.923599 | -11.053917 | 2.164142  |
| 120 | 1 | 0 | -12.757444 | -9.982180  | 0.210272  |
| 121 | 1 | 0 | -11.208131 | -10.498348 | 0.853279  |
| 122 | 1 | 0 | -11.608584 | -9.122201  | 2.921841  |
| 123 | 1 | 0 | -13.158485 | -8.607086  | 2.278856  |
| 124 | 1 | 0 | -11.990484 | -7.539399  | 0.321598  |
| 125 | 1 | 0 | -10.441172 | -8.050786  | 0.967858  |
| 126 | 1 | 0 | -10.842831 | -6.666251  | 3.028970  |
| 127 | 1 | 0 | -12.395403 | -6.158790  | 2.386161  |
| 128 | 1 | 0 | -11.234142 | -5.099227  | 0.420397  |
| 129 | 1 | 0 | -9.682139  | -5.601097  | 1.066580  |
| 130 | 1 | 0 | -10.080161 | -4.202823  | 3.117866  |
| 131 | 1 | 0 | -11.639545 | -3.709131  | 2.480531  |

|     |   |   |            |            |           |
|-----|---|---|------------|------------|-----------|
| 132 | 1 | 0 | -10.493796 | -2.653878  | 0.499735  |
| 133 | 1 | 0 | -8.938368  | -3.144664  | 1.132883  |
| 134 | 1 | 0 | -9.308640  | -1.758452  | 3.179697  |
| 135 | 1 | 0 | -10.883744 | -1.278750  | 2.588341  |
| 136 | 1 | 0 | -22.401754 | -2.198777  | -3.979725 |
| 137 | 1 | 0 | -21.030026 | -1.951978  | -5.068333 |
| 138 | 1 | 0 | -21.098737 | -3.392502  | -4.047112 |
| 139 | 1 | 0 | -20.900978 | -1.937683  | -1.989775 |
| 140 | 1 | 0 | -20.838366 | -0.505871  | -3.001277 |
| 141 | 1 | 0 | -18.711680 | -1.339271  | -4.051497 |
| 142 | 1 | 0 | -18.775206 | -2.773548  | -3.042034 |
| 143 | 1 | 0 | -18.617750 | -1.333382  | -0.984853 |
| 144 | 1 | 0 | -18.554497 | 0.101476   | -1.993793 |
| 145 | 1 | 0 | -16.428270 | -0.732446  | -3.048338 |
| 146 | 1 | 0 | -16.492540 | -2.169337  | -2.042933 |
| 147 | 1 | 0 | -16.330462 | -0.735254  | 0.017781  |
| 148 | 1 | 0 | -16.264375 | 0.702064   | -0.987597 |
| 149 | 1 | 0 | -14.142790 | -0.135513  | -2.048188 |
| 150 | 1 | 0 | -14.210917 | -1.576247  | -1.048913 |
| 151 | 1 | 0 | -14.037397 | -0.152285  | 1.017889  |
| 152 | 1 | 0 | -13.967094 | 1.289438   | 0.019110  |
| 153 | 1 | 0 | -11.848140 | 0.449573   | -1.049114 |
| 154 | 1 | 0 | -11.923810 | -0.998028  | -0.068382 |
| 155 | 1 | 0 | -11.749974 | 0.395852   | 2.013118  |
| 156 | 1 | 0 | -11.702898 | 1.843758   | 1.051755  |
| 157 | 1 | 0 | -13.037491 | 14.787342  | 1.073678  |
| 158 | 1 | 0 | -13.139041 | 13.725723  | 2.484342  |
| 159 | 1 | 0 | -11.560194 | 14.216092  | 1.860258  |
| 160 | 1 | 0 | -12.016903 | 12.941579  | -0.276090 |
| 161 | 1 | 0 | -13.583039 | 12.453392  | 0.345368  |
| 162 | 1 | 0 | -12.453996 | 11.223739  | 2.225663  |
| 163 | 1 | 0 | -10.887126 | 11.712661  | 1.604178  |
| 164 | 1 | 0 | -11.350593 | 10.476920  | -0.538016 |
| 165 | 1 | 0 | -12.917576 | 9.987584   | 0.083079  |
| 166 | 1 | 0 | -11.789079 | 8.755539   | 1.963118  |
| 167 | 1 | 0 | -10.221503 | 9.247789   | 1.346300  |
| 168 | 1 | 0 | -10.676397 | 8.015580   | -0.798185 |
| 169 | 1 | 0 | -12.245086 | 7.523369   | -0.183721 |
| 170 | 1 | 0 | -11.123646 | 6.287263   | 1.696750  |
| 171 | 1 | 0 | -9.553664  | 6.785263   | 1.091206  |
| 172 | 1 | 0 | -9.990958  | 5.560401   | -1.060185 |
| 173 | 1 | 0 | -11.562794 | 5.061857   | -0.458904 |
| 174 | 1 | 0 | -10.451322 | 3.813282   | 1.421590  |
| 175 | 1 | 0 | -8.879213  | 4.321674   | 0.840362  |
| 176 | 1 | 0 | -9.267758  | 3.136634   | -1.324324 |
| 177 | 1 | 0 | -10.846384 | 2.619469   | -0.780316 |
| 178 | 1 | 0 | 12.954397  | -14.813125 | -1.011030 |
| 179 | 1 | 0 | 11.484283  | -14.232280 | -1.804015 |
| 180 | 1 | 0 | 13.069056  | -13.761123 | -2.427875 |
| 181 | 1 | 0 | 13.521260  | -12.480182 | -0.295749 |
| 182 | 1 | 0 | 11.949267  | -12.949407 | 0.325525  |
| 183 | 1 | 0 | 10.835178  | -11.721195 | -1.564628 |
| 184 | 1 | 0 | 12.407966  | -11.250682 | -2.185399 |
| 185 | 1 | 0 | 12.878415  | -10.005993 | -0.049466 |
| 186 | 1 | 0 | 11.306174  | -10.477934 | 0.571777  |
| 187 | 1 | 0 | 10.191214  | -9.250116  | -1.322007 |

|     |   |   |           |           |           |
|-----|---|---|-----------|-----------|-----------|
| 188 | 1 | 0 | 11.764184 | -8.773929 | -1.937742 |
| 189 | 1 | 0 | 12.225350 | -7.533575 | 0.202897  |
| 190 | 1 | 0 | 10.652472 | -8.011554 | 0.817841  |
| 191 | 1 | 0 | 9.541048  | -6.783307 | -1.079891 |
| 192 | 1 | 0 | 11.115401 | -6.297560 | -1.684100 |
| 193 | 1 | 0 | 11.557419 | -5.064790 | 0.466256  |
| 194 | 1 | 0 | 9.982833  | -5.553549 | 1.068304  |
| 195 | 1 | 0 | 8.878617  | -4.317711 | -0.838889 |
| 196 | 1 | 0 | 10.453638 | -3.816650 | -1.418663 |
| 197 | 1 | 0 | 10.848826 | -2.616599 | 0.779265  |
| 198 | 1 | 0 | 9.269155  | -3.129422 | 1.324241  |
| 199 | 1 | 0 | 22.404646 | 2.196551  | 3.985124  |
| 200 | 1 | 0 | 21.102819 | 3.391779  | 4.048752  |
| 201 | 1 | 0 | 21.031339 | 1.953198  | 5.072517  |
| 202 | 1 | 0 | 20.840646 | 0.503521  | 3.007870  |
| 203 | 1 | 0 | 20.905999 | 1.933419  | 1.993836  |
| 204 | 1 | 0 | 18.779845 | 2.773450  | 3.042006  |
| 205 | 1 | 0 | 18.713580 | 1.341077  | 4.053993  |
| 206 | 1 | 0 | 18.557379 | -0.103233 | 1.998697  |
| 207 | 1 | 0 | 18.623324 | 1.329740  | 0.987253  |
| 208 | 1 | 0 | 16.497720 | 2.169796  | 2.041320  |
| 209 | 1 | 0 | 16.430761 | 0.734753  | 3.049188  |
| 210 | 1 | 0 | 16.267888 | -0.703221 | 0.990752  |
| 211 | 1 | 0 | 16.336571 | 0.732281  | -0.017045 |
| 212 | 1 | 0 | 14.216620 | 1.577222  | 1.045770  |
| 213 | 1 | 0 | 14.145902 | 0.138244  | 2.047394  |
| 214 | 1 | 0 | 13.971268 | -1.290005 | -0.017759 |
| 215 | 1 | 0 | 14.044038 | 0.150008  | -1.018826 |
| 216 | 1 | 0 | 11.930015 | 0.999496  | 0.063759  |
| 217 | 1 | 0 | 11.851894 | -0.446498 | 1.046666  |
| 218 | 1 | 0 | 11.707782 | -1.843805 | -1.052273 |
| 219 | 1 | 0 | 11.757165 | -0.397379 | -2.015747 |
| 220 | 1 | 0 | 13.506300 | 13.442124 | -1.580494 |
| 221 | 1 | 0 | 12.011357 | 12.980601 | -0.755952 |
| 222 | 1 | 0 | 13.572056 | 12.458484 | -0.112233 |
| 223 | 1 | 0 | 13.946020 | 11.048373 | -2.176454 |
| 224 | 1 | 0 | 12.398690 | 11.568634 | -2.818715 |
| 225 | 1 | 0 | 11.227880 | 10.498295 | -0.868811 |
| 226 | 1 | 0 | 12.775516 | 9.980518  | -0.223063 |
| 227 | 1 | 0 | 13.177401 | 8.602594  | -2.289620 |
| 228 | 1 | 0 | 11.629129 | 9.119267  | -2.935277 |
| 229 | 1 | 0 | 10.457506 | 8.051694  | -0.981698 |
| 230 | 1 | 0 | 12.005198 | 7.538775  | -0.332780 |
| 231 | 1 | 0 | 12.410897 | 6.155366  | -2.395360 |
| 232 | 1 | 0 | 10.859835 | 6.664258  | -3.040681 |
| 233 | 1 | 0 | 9.695221  | 5.602867  | -1.078556 |
| 234 | 1 | 0 | 11.245732 | 5.099611  | -0.429877 |
| 235 | 1 | 0 | 11.651802 | 3.706747  | -2.488076 |
| 236 | 1 | 0 | 10.093747 | 4.201688  | -3.127695 |
| 237 | 1 | 0 | 8.948439  | 3.147185  | -1.142762 |
| 238 | 1 | 0 | 10.502567 | 2.655199  | -0.507355 |
| 239 | 1 | 0 | 10.893088 | 1.277329  | -2.594112 |
| 240 | 1 | 0 | 9.319057  | 1.758081  | -3.187481 |

DFT calculation data for **PBI-N<sup>10</sup>**:



| Center<br>No. | Atomic<br>No. | Atomic<br>Type | Coordinates (Angstroms) |            |           |
|---------------|---------------|----------------|-------------------------|------------|-----------|
|               |               |                | X                       | Y          | Z         |
| 1             | 6             | 0              | -3.066270               | 2.278547   | -1.942425 |
| 2             | 6             | 0              | -1.706103               | 2.459640   | -2.199926 |
| 3             | 6             | 0              | -0.772835               | 1.466277   | -1.901699 |
| 4             | 6             | 0              | -1.346466               | 0.300816   | -1.336611 |
| 5             | 6             | 0              | -2.697034               | 0.087491   | -1.061504 |
| 6             | 6             | 0              | -3.579205               | 1.118482   | -1.376290 |
| 7             | 6             | 0              | -0.521866               | -0.750977  | -1.015099 |
| 8             | 6             | 0              | -0.850718               | -1.984034  | -0.467409 |
| 9             | 6             | 0              | -2.217389               | -2.165318  | -0.191938 |
| 10            | 6             | 0              | -3.112715               | -1.139288  | -0.484512 |
| 11            | 6             | 0              | 0.672910                | 1.516819   | -2.108909 |
| 12            | 6             | 0              | 1.455451                | 0.399895   | -1.729666 |
| 13            | 6             | 0              | 0.827756                | -0.705641  | -1.208399 |
| 14            | 6             | 0              | 1.420179                | 2.558262   | -2.660929 |
| 15            | 6             | 0              | 2.807953                | 2.469232   | -2.797120 |
| 16            | 6             | 0              | 3.533071                | 1.359286   | -2.384037 |
| 17            | 6             | 0              | 2.838433                | 0.283462   | -1.836177 |
| 18            | 6             | 0              | 3.479292                | -0.921798  | -1.453058 |
| 19            | 6             | 0              | 2.775544                | -2.012138  | -0.949877 |
| 20            | 6             | 0              | 1.379477                | -1.913256  | -0.800653 |
| 21            | 6             | 0              | -4.518946               | -1.306980  | -0.178600 |
| 22            | 7             | 0              | -5.400302               | -0.253017  | -0.502088 |
| 23            | 6             | 0              | -4.992802               | 0.948741   | -1.121012 |
| 24            | 6             | 0              | 4.975128                | 1.276640   | -2.499254 |
| 25            | 7             | 0              | 5.609381                | 0.250340   | -1.750593 |
| 26            | 6             | 0              | 4.920727                | -0.985381  | -1.603567 |
| 27            | 8             | 0              | -5.823750               | 1.790665   | -1.443563 |
| 28            | 8             | 0              | -4.947192               | -2.311707  | 0.382487  |
| 29            | 8             | 0              | 5.620994                | 2.064813   | -3.176366 |
| 30            | 8             | 0              | 5.526838                | -2.049198  | -1.573569 |
| 31            | 6             | 0              | -6.774760               | -0.405498  | -0.170620 |
| 32            | 6             | 0              | 6.907223                | 0.438179   | -1.206632 |
| 33            | 6             | 0              | -7.457269               | 0.573952   | 0.527320  |
| 34            | 6             | 0              | -8.794154               | 0.454429   | 0.871319  |
| 35            | 6             | 0              | -9.490364               | -0.712857  | 0.536854  |
| 36            | 6             | 0              | -8.820944               | -1.706652  | -0.185888 |
| 37            | 6             | 0              | -7.489861               | -1.534695  | -0.526265 |
| 38            | 6             | 0              | 7.527607                | -0.507242  | -0.397658 |
| 39            | 6             | 0              | 8.782842                | -0.344171  | 0.168846  |
| 40            | 6             | 0              | 9.475765                | 0.859178   | -0.003416 |
| 41            | 6             | 0              | 8.855634                | 1.855708   | -0.764054 |
| 42            | 6             | 0              | 7.603835                | 1.636440   | -1.318360 |
| 43            | 7             | 0              | 0.330092                | -2.680215  | -0.350383 |
| 44            | 6             | 0              | 0.453407                | -4.044904  | 0.182967  |
| 45            | 6             | 0              | 0.685108                | -4.051685  | 1.695625  |
| 46            | 6             | 0              | -11.583203              | -13.714968 | 3.121357  |
| 47            | 6             | 0              | -11.746670              | -12.623896 | 2.057743  |
| 48            | 6             | 0              | -11.001714              | -11.332270 | 2.421343  |
| 49            | 6             | 0              | -11.162251              | -10.232600 | 1.361823  |
| 50            | 6             | 0              | -10.420111              | -8.939672  | 1.729963  |
| 51            | 6             | 0              | -10.584477              | -7.835205  | 0.675834  |
| 52            | 6             | 0              | -9.850652               | -6.540378  | 1.054001  |
| 53            | 6             | 0              | -10.022790              | -5.427631  | 0.010153  |

|     |   |   |            |            |           |
|-----|---|---|------------|------------|-----------|
| 54  | 6 | 0 | -9.303538  | -4.129777  | 0.407151  |
| 55  | 6 | 0 | -9.482086  | -3.005205  | -0.626822 |
| 56  | 6 | 0 | -21.833305 | 1.941672   | -1.525036 |
| 57  | 6 | 0 | -20.811518 | 1.210103   | -0.648013 |
| 58  | 6 | 0 | -19.373130 | 1.377071   | -1.156686 |
| 59  | 6 | 0 | -18.343878 | 0.648511   | -0.280719 |
| 60  | 6 | 0 | -16.903609 | 0.818650   | -0.785454 |
| 61  | 6 | 0 | -15.875980 | 0.095963   | 0.097479  |
| 62  | 6 | 0 | -14.432723 | 0.274237   | -0.395656 |
| 63  | 6 | 0 | -13.408562 | -0.434383  | 0.502389  |
| 64  | 6 | 0 | -11.960809 | -0.238411  | 0.027873  |
| 65  | 6 | 0 | -10.941045 | -0.911175  | 0.959666  |
| 66  | 6 | 0 | -13.072254 | 12.425534  | -0.240484 |
| 67  | 6 | 0 | -12.928388 | 11.210395  | 0.682103  |
| 68  | 6 | 0 | -12.187034 | 10.046691  | 0.009979  |
| 69  | 6 | 0 | -12.039683 | 8.824209   | 0.927340  |
| 70  | 6 | 0 | -11.297984 | 7.660879   | 0.253134  |
| 71  | 6 | 0 | -11.152361 | 6.435560   | 1.167090  |
| 72  | 6 | 0 | -10.412395 | 5.273800   | 0.488293  |
| 73  | 6 | 0 | -10.271518 | 4.043185   | 1.395490  |
| 74  | 6 | 0 | -9.541112  | 2.882474   | 0.703432  |
| 75  | 6 | 0 | -9.405922  | 1.641162   | 1.606188  |
| 76  | 6 | 0 | 13.387411  | -12.242559 | -0.338867 |
| 77  | 6 | 0 | 13.080991  | -11.036390 | 0.555363  |
| 78  | 6 | 0 | 12.454605  | -9.871415  | -0.223094 |
| 79  | 6 | 0 | 12.144300  | -8.658587  | 0.665962  |
| 80  | 6 | 0 | 11.516010  | -7.494593  | -0.114036 |
| 81  | 6 | 0 | 11.204142  | -6.280825  | 0.773415  |
| 82  | 6 | 0 | 10.573226  | -5.119888  | -0.008994 |
| 83  | 6 | 0 | 10.259674  | -3.904550  | 0.875200  |
| 84  | 6 | 0 | 9.630405   | -2.747316  | 0.084817  |
| 85  | 6 | 0 | 9.311968   | -1.527533  | 0.969985  |
| 86  | 6 | 0 | 22.086799  | -1.260190  | -0.201849 |
| 87  | 6 | 0 | 20.911555  | -0.606037  | 0.532480  |
| 88  | 6 | 0 | 19.577760  | -0.800160  | -0.201514 |
| 89  | 6 | 0 | 18.395456  | -0.149249  | 0.530568  |
| 90  | 6 | 0 | 17.059311  | -0.346578  | -0.200077 |
| 91  | 6 | 0 | 15.877798  | 0.298388   | 0.538695  |
| 92  | 6 | 0 | 14.537435  | 0.092808   | -0.181925 |
| 93  | 6 | 0 | 13.357561  | 0.723958   | 0.571148  |
| 94  | 6 | 0 | 12.010587  | 0.501029   | -0.132722 |
| 95  | 6 | 0 | 10.830804  | 1.098162   | 0.650356  |
| 96  | 6 | 0 | 10.477177  | 13.636363  | 3.868925  |
| 97  | 6 | 0 | 10.841055  | 12.651204  | 2.752922  |
| 98  | 6 | 0 | 10.119969  | 11.304376  | 2.899741  |
| 99  | 6 | 0 | 10.481163  | 10.310039  | 1.786817  |
| 100 | 6 | 0 | 9.762908   | 8.961333   | 1.938628  |
| 101 | 6 | 0 | 10.128738  | 7.961757   | 0.831761  |
| 102 | 6 | 0 | 9.418820   | 6.609974   | 0.994732  |
| 103 | 6 | 0 | 9.793561   | 5.601112   | -0.100490 |
| 104 | 6 | 0 | 9.098536   | 4.243858   | 0.083115  |
| 105 | 6 | 0 | 9.482406   | 3.222837   | -1.001082 |
| 106 | 1 | 0 | -3.733346  | 3.089212   | -2.198151 |
| 107 | 1 | 0 | -1.402848  | 3.400116   | -2.638021 |
| 108 | 1 | 0 | -2.556685  | -3.091908  | 0.249008  |
| 109 | 1 | 0 | 0.945609   | 3.468926   | -2.998699 |

|     |   |   |            |            |           |
|-----|---|---|------------|------------|-----------|
| 110 | 1 | 0 | 3.324968   | 3.316021   | -3.225559 |
| 111 | 1 | 0 | 3.289432   | -2.915985  | -0.654437 |
| 112 | 1 | 0 | -6.927901  | 1.461526   | 0.845150  |
| 113 | 1 | 0 | -7.003604  | -2.310440  | -1.101214 |
| 114 | 1 | 0 | 7.035726   | -1.427500  | -0.135315 |
| 115 | 1 | 0 | 7.178651   | 2.486490   | -1.823348 |
| 116 | 1 | 0 | -0.446601  | -4.615196  | -0.058253 |
| 117 | 1 | 0 | 1.273004   | -4.561923  | -0.321575 |
| 118 | 1 | 0 | 0.774056   | -5.074418  | 2.072424  |
| 119 | 1 | 0 | 1.603242   | -3.517857  | 1.955892  |
| 120 | 1 | 0 | -0.143396  | -3.571342  | 2.223221  |
| 121 | 1 | 0 | -12.121995 | -14.626203 | 2.842444  |
| 122 | 1 | 0 | -10.529919 | -13.981441 | 3.255544  |
| 123 | 1 | 0 | -11.972059 | -13.384303 | 4.089776  |
| 124 | 1 | 0 | -12.813561 | -12.404063 | 1.929962  |
| 125 | 1 | 0 | -11.374430 | -12.999804 | 1.097029  |
| 126 | 1 | 0 | -9.935419  | -11.556836 | 2.549142  |
| 127 | 1 | 0 | -11.375392 | -10.962134 | 3.384248  |
| 128 | 1 | 0 | -12.228935 | -10.010548 | 1.233150  |
| 129 | 1 | 0 | -10.786305 | -10.601883 | 0.399529  |
| 130 | 1 | 0 | -9.352886  | -9.160726  | 1.856008  |
| 131 | 1 | 0 | -10.794063 | -8.573820  | 2.694361  |
| 132 | 1 | 0 | -11.652180 | -7.618241  | 0.546352  |
| 133 | 1 | 0 | -10.204459 | -8.196694  | -0.287800 |
| 134 | 1 | 0 | -8.781998  | -6.754916  | 1.178097  |
| 135 | 1 | 0 | -10.226897 | -6.185367  | 2.021495  |
| 136 | 1 | 0 | -11.092585 | -5.219685  | -0.119760 |
| 137 | 1 | 0 | -9.635947  | -5.774907  | -0.956239 |
| 138 | 1 | 0 | -8.233477  | -4.331075  | 0.533264  |
| 139 | 1 | 0 | -9.681344  | -3.797360  | 1.380799  |
| 140 | 1 | 0 | -10.540658 | -2.856457  | -0.854043 |
| 141 | 1 | 0 | -9.046281  | -3.331132  | -1.578741 |
| 142 | 1 | 0 | -22.851141 | 1.809376   | -1.144264 |
| 143 | 1 | 0 | -21.629225 | 3.016721   | -1.556483 |
| 144 | 1 | 0 | -21.813196 | 1.565500   | -2.552854 |
| 145 | 1 | 0 | -21.063972 | 0.143292   | -0.615980 |
| 146 | 1 | 0 | -20.880521 | 1.591769   | 0.377896  |
| 147 | 1 | 0 | -19.126130 | 2.445569   | -1.189590 |
| 148 | 1 | 0 | -19.308371 | 0.994562   | -2.182919 |
| 149 | 1 | 0 | -18.590241 | -0.420146  | -0.249317 |
| 150 | 1 | 0 | -18.412201 | 1.029812   | 0.745776  |
| 151 | 1 | 0 | -16.659053 | 1.887596   | -0.819997 |
| 152 | 1 | 0 | -16.832616 | 0.433071   | -1.810069 |
| 153 | 1 | 0 | -16.116386 | -0.974032  | 0.128120  |
| 154 | 1 | 0 | -15.954014 | 0.477711   | 1.123173  |
| 155 | 1 | 0 | -14.196289 | 1.344882   | -0.433767 |
| 156 | 1 | 0 | -14.348468 | -0.116828  | -1.417143 |
| 157 | 1 | 0 | -13.636953 | -1.507238  | 0.534206  |
| 158 | 1 | 0 | -13.504145 | -0.049009  | 1.525520  |
| 159 | 1 | 0 | -11.753731 | 0.834009   | -0.033471 |
| 160 | 1 | 0 | -11.850176 | -0.644803  | -0.984241 |
| 161 | 1 | 0 | -11.185781 | -1.972857  | 1.038222  |
| 162 | 1 | 0 | -11.083394 | -0.566623  | 1.988493  |
| 163 | 1 | 0 | -13.603132 | 13.242874  | 0.258099  |
| 164 | 1 | 0 | -12.093140 | 12.806195  | -0.548246 |
| 165 | 1 | 0 | -13.633044 | 12.170459  | -1.145375 |

|     |   |   |            |            |           |
|-----|---|---|------------|------------|-----------|
| 166 | 1 | 0 | -13.925443 | 10.874928  | 0.992409  |
| 167 | 1 | 0 | -12.388640 | 11.509547  | 1.588771  |
| 168 | 1 | 0 | -11.191033 | 10.387031  | -0.299688 |
| 169 | 1 | 0 | -12.728849 | 9.752857   | -0.897648 |
| 170 | 1 | 0 | -13.036047 | 8.484534   | 1.236517  |
| 171 | 1 | 0 | -11.497988 | 9.118511   | 1.834891  |
| 172 | 1 | 0 | -10.301182 | 8.000386   | -0.054746 |
| 173 | 1 | 0 | -11.838773 | 7.368911   | -0.655680 |
| 174 | 1 | 0 | -12.149328 | 6.096235   | 1.474948  |
| 175 | 1 | 0 | -10.610062 | 6.726023   | 2.075552  |
| 176 | 1 | 0 | -9.414570  | 5.611997   | 0.182987  |
| 177 | 1 | 0 | -10.952908 | 4.987595   | -0.422473 |
| 178 | 1 | 0 | -11.270794 | 3.709288   | 1.703209  |
| 179 | 1 | 0 | -9.724431  | 4.323644   | 2.304584  |
| 180 | 1 | 0 | -8.550329  | 3.224500   | 0.385905  |
| 181 | 1 | 0 | -10.086574 | 2.609387   | -0.206564 |
| 182 | 1 | 0 | -10.386469 | 1.415587   | 2.025346  |
| 183 | 1 | 0 | -8.773579  | 1.890035   | 2.467821  |
| 184 | 1 | 0 | 13.832802  | -13.060881 | 0.235992  |
| 185 | 1 | 0 | 12.476996  | -12.626729 | -0.809949 |
| 186 | 1 | 0 | 14.090602  | -11.976251 | -1.134407 |
| 187 | 1 | 0 | 14.008860  | -10.697502 | 1.031900  |
| 188 | 1 | 0 | 12.398462  | -11.346861 | 1.355831  |
| 189 | 1 | 0 | 11.528021  | -10.215514 | -0.699403 |
| 190 | 1 | 0 | 13.139577  | -9.565545  | -1.023659 |
| 191 | 1 | 0 | 13.071257  | -8.314326  | 1.141245  |
| 192 | 1 | 0 | 11.460225  | -8.965457  | 1.466989  |
| 193 | 1 | 0 | 10.589462  | -7.839463  | -0.589690 |
| 194 | 1 | 0 | 12.200053  | -7.187839  | -0.915002 |
| 195 | 1 | 0 | 12.130911  | -5.933978  | 1.247299  |
| 196 | 1 | 0 | 10.520955  | -6.587339  | 1.575346  |
| 197 | 1 | 0 | 9.647371   | -5.467548  | -0.483612 |
| 198 | 1 | 0 | 11.256418  | -4.813664  | -0.810857 |
| 199 | 1 | 0 | 11.186786  | -3.557599  | 1.349343  |
| 200 | 1 | 0 | 9.574396   | -4.207836  | 1.677015  |
| 201 | 1 | 0 | 8.717687   | -3.106587  | -0.402299 |
| 202 | 1 | 0 | 10.317018  | -2.444410  | -0.713684 |
| 203 | 1 | 0 | 10.208004  | -1.280898  | 1.539240  |
| 204 | 1 | 0 | 8.564506   | -1.812664  | 1.721671  |
| 205 | 1 | 0 | 23.026809  | -1.109562  | 0.338623  |
| 206 | 1 | 0 | 21.935396  | -2.339158  | -0.307687 |
| 207 | 1 | 0 | 22.210463  | -0.838284  | -1.204377 |
| 208 | 1 | 0 | 21.110953  | 0.466446   | 0.646120  |
| 209 | 1 | 0 | 20.836605  | -1.031532  | 1.540616  |
| 210 | 1 | 0 | 19.383982  | -1.874070  | -0.315151 |
| 211 | 1 | 0 | 19.656954  | -0.373636  | -1.209239 |
| 212 | 1 | 0 | 18.588980  | 0.924849   | 0.642694  |
| 213 | 1 | 0 | 18.319709  | -0.574675  | 1.539059  |
| 214 | 1 | 0 | 16.867936  | -1.420750  | -0.314992 |
| 215 | 1 | 0 | 17.132019  | 0.082698   | -1.207046 |
| 216 | 1 | 0 | 16.065733  | 1.373622   | 0.649364  |
| 217 | 1 | 0 | 15.811176  | -0.127013  | 1.547885  |
| 218 | 1 | 0 | 14.354294  | -0.982542  | -0.299036 |
| 219 | 1 | 0 | 14.597155  | 0.526750   | -1.187662 |
| 220 | 1 | 0 | 13.534366  | 1.801358   | 0.681465  |
| 221 | 1 | 0 | 13.308227  | 0.295485   | 1.580343  |

|     |   |   |           |           |           |
|-----|---|---|-----------|-----------|-----------|
| 222 | 1 | 0 | 11.858071 | -0.574084 | -0.267267 |
| 223 | 1 | 0 | 12.042567 | 0.948973  | -1.132868 |
| 224 | 1 | 0 | 11.017570 | 2.163721  | 0.799904  |
| 225 | 1 | 0 | 10.826686 | 0.720098  | 1.677324  |
| 226 | 1 | 0 | 11.001941 | 14.589105 | 3.745132  |
| 227 | 1 | 0 | 9.403271  | 13.848621 | 3.874098  |
| 228 | 1 | 0 | 10.745341 | 13.236472 | 4.852064  |
| 229 | 1 | 0 | 11.925158 | 12.485319 | 2.759802  |
| 230 | 1 | 0 | 10.585887 | 13.096078 | 1.783473  |
| 231 | 1 | 0 | 9.036178  | 11.474971 | 2.892996  |
| 232 | 1 | 0 | 10.375606 | 10.865265 | 3.872171  |
| 233 | 1 | 0 | 11.565399 | 10.142452 | 1.792881  |
| 234 | 1 | 0 | 10.223015 | 10.748034 | 0.814672  |
| 235 | 1 | 0 | 8.678525  | 9.127915  | 1.929007  |
| 236 | 1 | 0 | 10.018083 | 8.526931  | 2.913262  |
| 237 | 1 | 0 | 11.213899 | 7.800413  | 0.838033  |
| 238 | 1 | 0 | 9.867035  | 8.391133  | -0.143244 |
| 239 | 1 | 0 | 8.333324  | 6.768991  | 0.981573  |
| 240 | 1 | 0 | 9.674973  | 6.187181  | 1.974252  |
| 241 | 1 | 0 | 10.880522 | 5.450642  | -0.092661 |
| 242 | 1 | 0 | 9.526306  | 6.015047  | -1.080770 |
| 243 | 1 | 0 | 8.011670  | 4.388271  | 0.069154  |
| 244 | 1 | 0 | 9.353088  | 3.845340  | 1.071850  |
| 245 | 1 | 0 | 10.568887 | 3.146398  | -1.090689 |
| 246 | 1 | 0 | 9.164947  | 3.609411  | -1.976383 |

DFT calculation data for **PBI-S<sup>10</sup>**:

| Center No. | Atomic No. | Atomic Type | Coordinates (Angstroms) |           |           |
|------------|------------|-------------|-------------------------|-----------|-----------|
|            |            |             | X                       | Y         | Z         |
| 1          | 6          | 0           | 3.146294                | -2.743163 | -0.305884 |
| 2          | 6          | 0           | 1.775020                | -2.976693 | -0.317620 |
| 3          | 6          | 0           | 0.849904                | -1.924615 | -0.299629 |
| 4          | 6          | 0           | 1.437191                | -0.634804 | -0.278634 |
| 5          | 6          | 0           | 2.816390                | -0.365933 | -0.262044 |
| 6          | 6          | 0           | 3.688682                | -1.458144 | -0.272057 |
| 7          | 6          | 0           | 0.600235                | 0.472852  | -0.263494 |
| 8          | 6          | 0           | 1.001183                | 1.817680  | -0.238295 |
| 9          | 6          | 0           | 2.391154                | 2.046505  | -0.219808 |
| 10         | 6          | 0           | 3.278823                | 0.974239  | -0.230480 |
| 11         | 6          | 0           | -0.590541               | -2.056371 | -0.293065 |
| 12         | 6          | 0           | -1.401777               | -0.894360 | -0.268292 |
| 13         | 6          | 0           | -0.779484               | 0.346691  | -0.258942 |
| 14         | 6          | 0           | -1.309919               | -3.258699 | -0.299420 |
| 15         | 6          | 0           | -2.700496               | -3.277536 | -0.269762 |
| 16         | 6          | 0           | -3.467158               | -2.112265 | -0.238459 |
| 17         | 6          | 0           | -2.806613               | -0.880364 | -0.241326 |
| 18         | 6          | 0           | -3.503822               | 0.354093  | -0.212757 |
| 19         | 6          | 0           | -2.825830               | 1.569818  | -0.211990 |
| 20         | 6          | 0           | -1.417423               | 1.596646  | -0.231612 |

|    |    |   |            |            |           |
|----|----|---|------------|------------|-----------|
| 21 | 6  | 0 | 4.703745   | 1.225591   | -0.186658 |
| 22 | 7  | 0 | 5.567861   | 0.099297   | -0.189881 |
| 23 | 6  | 0 | 5.117277   | -1.245579  | -0.256935 |
| 24 | 6  | 0 | -4.909812  | -2.162875  | -0.181804 |
| 25 | 7  | 0 | -5.596357  | -0.921545  | -0.138823 |
| 26 | 6  | 0 | -4.950877  | 0.342991   | -0.188560 |
| 27 | 8  | 0 | 5.923759   | -2.169938  | -0.322921 |
| 28 | 8  | 0 | 5.169358   | 2.360156   | -0.106672 |
| 29 | 8  | 0 | -5.531974  | -3.220765  | -0.128227 |
| 30 | 8  | 0 | -5.616868  | 1.375089   | -0.231415 |
| 31 | 6  | 0 | 6.963139   | 0.331912   | -0.103138 |
| 32 | 6  | 0 | -7.008919  | -0.944501  | -0.025995 |
| 33 | 6  | 0 | 7.739464   | -0.308339  | 0.852767  |
| 34 | 6  | 0 | 9.106206   | -0.094792  | 0.973177  |
| 35 | 6  | 0 | 9.739754   | 0.819113   | 0.118388  |
| 36 | 6  | 0 | 8.976633   | 1.457921   | -0.869620 |
| 37 | 6  | 0 | 7.614681   | 1.206759   | -0.961270 |
| 38 | 6  | 0 | -7.660009  | -0.211780  | 0.956804  |
| 39 | 6  | 0 | -9.041033  | -0.207794  | 1.098547  |
| 40 | 6  | 0 | -9.824157  | -0.993107  | 0.239914  |
| 41 | 6  | 0 | -9.186179  | -1.731489  | -0.767450 |
| 42 | 6  | 0 | -7.803134  | -1.695550  | -0.881396 |
| 43 | 16 | 0 | -0.307721  | 2.796869   | -0.225450 |
| 44 | 6  | 0 | 11.629027  | 13.718581  | -3.271842 |
| 45 | 6  | 0 | 11.725087  | 12.274819  | -3.780697 |
| 46 | 6  | 0 | 11.092892  | 11.266020  | -2.809979 |
| 47 | 6  | 0 | 11.185007  | 9.816451   | -3.312877 |
| 48 | 6  | 0 | 10.553393  | 8.807906   | -2.339920 |
| 49 | 6  | 0 | 10.644937  | 7.357547   | -2.840874 |
| 50 | 6  | 0 | 10.015142  | 6.351091   | -1.864564 |
| 51 | 6  | 0 | 10.106164  | 4.899495   | -2.361599 |
| 52 | 6  | 0 | 9.480383   | 3.897240   | -1.378041 |
| 53 | 6  | 0 | 9.565887   | 2.442019   | -1.872704 |
| 54 | 6  | 0 | 21.811243  | -2.980259  | -1.795334 |
| 55 | 6  | 0 | 20.883468  | -1.905875  | -1.214423 |
| 56 | 6  | 0 | 19.400263  | -2.199498  | -1.486282 |
| 57 | 6  | 0 | 18.465205  | -1.128144  | -0.903003 |
| 58 | 6  | 0 | 16.980066  | -1.423234  | -1.167921 |
| 59 | 6  | 0 | 16.047972  | -0.355932  | -0.572259 |
| 60 | 6  | 0 | 14.560454  | -0.654913  | -0.818704 |
| 61 | 6  | 0 | 13.634447  | 0.402776   | -0.197108 |
| 62 | 6  | 0 | 12.143600  | 0.093240   | -0.410604 |
| 63 | 6  | 0 | 11.226402  | 1.126898   | 0.265169  |
| 64 | 6  | 0 | 13.187750  | -11.625448 | 4.668058  |
| 65 | 6  | 0 | 13.161009  | -10.124601 | 4.983350  |
| 66 | 6  | 0 | 12.368808  | -9.319260  | 3.942344  |
| 67 | 6  | 0 | 12.336676  | -7.814057  | 4.251544  |
| 68 | 6  | 0 | 11.541537  | -7.009599  | 3.210701  |
| 69 | 6  | 0 | 11.506456  | -5.504391  | 3.520063  |
| 70 | 6  | 0 | 10.706821  | -4.702570  | 2.480645  |
| 71 | 6  | 0 | 10.667687  | -3.197630  | 2.789999  |
| 72 | 6  | 0 | 9.865675   | -2.401160  | 1.747773  |
| 73 | 6  | 0 | 9.819361   | -0.892146  | 2.060401  |
| 74 | 6  | 0 | -10.813784 | 11.767215  | 5.184018  |
| 75 | 6  | 0 | -11.076850 | 10.280944  | 5.456765  |
| 76 | 6  | 0 | -10.486740 | 9.370364   | 4.369364  |

|     |   |   |            |            |           |
|-----|---|---|------------|------------|-----------|
| 77  | 6 | 0 | -10.743570 | 7.878619   | 4.636287  |
| 78  | 6 | 0 | -10.147376 | 6.969092   | 3.549982  |
| 79  | 6 | 0 | -10.395269 | 5.476021   | 3.818537  |
| 80  | 6 | 0 | -9.786530  | 4.569928   | 2.736365  |
| 81  | 6 | 0 | -10.018556 | 3.075087   | 3.007997  |
| 82  | 6 | 0 | -9.392593  | 2.176609   | 1.928686  |
| 83  | 6 | 0 | -9.601444  | 0.675190   | 2.209338  |
| 84  | 6 | 0 | -21.056736 | 4.854047   | -1.577671 |
| 85  | 6 | 0 | -20.332191 | 3.628737   | -1.006582 |
| 86  | 6 | 0 | -18.820549 | 3.659523   | -1.278349 |
| 87  | 6 | 0 | -18.087661 | 2.436015   | -0.705460 |
| 88  | 6 | 0 | -16.573970 | 2.468949   | -0.971043 |
| 89  | 6 | 0 | -15.841436 | 1.250117   | -0.387530 |
| 90  | 6 | 0 | -14.325172 | 1.288835   | -0.636882 |
| 91  | 6 | 0 | -13.593407 | 0.080541   | -0.030949 |
| 92  | 6 | 0 | -12.072752 | 0.132653   | -0.251631 |
| 93  | 6 | 0 | -11.339676 | -1.051639  | 0.401733  |
| 94  | 6 | 0 | -14.326554 | -13.201938 | -3.026470 |
| 95  | 6 | 0 | -14.121138 | -11.775516 | -3.551477 |
| 96  | 6 | 0 | -13.254994 | -10.922440 | -2.612393 |
| 97  | 6 | 0 | -13.046628 | -9.490300  | -3.130109 |
| 98  | 6 | 0 | -12.184424 | -8.636025  | -2.186875 |
| 99  | 6 | 0 | -11.982841 | -7.200814  | -2.698900 |
| 100 | 6 | 0 | -11.131705 | -6.344187  | -1.747781 |
| 101 | 6 | 0 | -10.943997 | -4.903423  | -2.248998 |
| 102 | 6 | 0 | -10.113909 | -4.043085  | -1.282341 |
| 103 | 6 | 0 | -9.941804  | -2.593541  | -1.771382 |
| 104 | 1 | 0 | 3.805151   | -3.612752  | -0.317792 |
| 105 | 1 | 0 | 1.450978   | -4.018679  | -0.336935 |
| 106 | 1 | 0 | 2.757390   | 3.074835   | -0.190768 |
| 107 | 1 | 0 | -0.802502  | -4.224762  | -0.317225 |
| 108 | 1 | 0 | -3.190124  | -4.252595  | -0.265171 |
| 109 | 1 | 0 | -3.373077  | 2.514487   | -0.188847 |
| 110 | 1 | 0 | 7.257368   | -0.985364  | 1.561721  |
| 111 | 1 | 0 | 7.044166   | 1.706199   | -1.747447 |
| 112 | 1 | 0 | -7.066193  | 0.366963   | 1.667964  |
| 113 | 1 | 0 | -7.331309  | -2.264211  | -1.685656 |
| 114 | 1 | 0 | 12.088104  | 14.425441  | -3.982749 |
| 115 | 1 | 0 | 10.578395  | 14.022506  | -3.131817 |
| 116 | 1 | 0 | 12.146475  | 13.835464  | -2.305150 |
| 117 | 1 | 0 | 12.787964  | 12.016053  | -3.936772 |
| 118 | 1 | 0 | 11.222376  | 12.202912  | -4.762083 |
| 119 | 1 | 0 | 10.030742  | 11.529944  | -2.655334 |
| 120 | 1 | 0 | 11.597565  | 11.342898  | -1.829596 |
| 121 | 1 | 0 | 12.247217  | 9.553612   | -3.468322 |
| 122 | 1 | 0 | 10.679617  | 9.740025   | -4.292856 |
| 123 | 1 | 0 | 9.491229   | 9.070959   | -2.184499 |
| 124 | 1 | 0 | 11.058654  | 8.885125   | -1.359921 |
| 125 | 1 | 0 | 11.706927  | 7.094500   | -2.997770 |
| 126 | 1 | 0 | 10.137597  | 7.279223   | -3.819651 |
| 127 | 1 | 0 | 8.953175   | 6.613957   | -1.707902 |
| 128 | 1 | 0 | 10.522019  | 6.431002   | -0.885673 |
| 129 | 1 | 0 | 11.168119  | 4.636356   | -2.520114 |
| 130 | 1 | 0 | 9.595862   | 4.816914   | -3.338603 |
| 131 | 1 | 0 | 8.419858   | 4.159219   | -1.215637 |
| 132 | 1 | 0 | 9.987393   | 3.987182   | -0.400898 |

|     |   |   |            |            |           |
|-----|---|---|------------|------------|-----------|
| 133 | 1 | 0 | 10.603603  | 2.180093   | -2.133463 |
| 134 | 1 | 0 | 9.020235   | 2.360497   | -2.829555 |
| 135 | 1 | 0 | 22.869589  | -2.749905  | -1.588832 |
| 136 | 1 | 0 | 21.595098  | -3.970384  | -1.360928 |
| 137 | 1 | 0 | 21.694798  | -3.058094  | -2.889036 |
| 138 | 1 | 0 | 21.148115  | -0.925209  | -1.649478 |
| 139 | 1 | 0 | 21.048944  | -1.836400  | -0.124102 |
| 140 | 1 | 0 | 19.141331  | -3.182638  | -1.052554 |
| 141 | 1 | 0 | 19.238772  | -2.267775  | -2.577555 |
| 142 | 1 | 0 | 18.722948  | -0.145672  | -1.338636 |
| 143 | 1 | 0 | 18.631253  | -1.058741  | 0.187562  |
| 144 | 1 | 0 | 16.724359  | -2.408289  | -0.736859 |
| 145 | 1 | 0 | 16.810393  | -1.486103  | -2.258208 |
| 146 | 1 | 0 | 16.297225  | 0.628453   | -1.008646 |
| 147 | 1 | 0 | 16.226950  | -0.288333  | 0.516384  |
| 148 | 1 | 0 | 14.315718  | -1.644968  | -0.392699 |
| 149 | 1 | 0 | 14.373806  | -0.708226  | -1.906687 |
| 150 | 1 | 0 | 13.867239  | 1.392110   | -0.631595 |
| 151 | 1 | 0 | 13.836437  | 0.463064   | 0.888101  |
| 152 | 1 | 0 | 11.930143  | -0.911907  | -0.009630 |
| 153 | 1 | 0 | 11.924599  | 0.062066   | -1.492731 |
| 154 | 1 | 0 | 11.467764  | 2.126258   | -0.128841 |
| 155 | 1 | 0 | 11.487614  | 1.231671   | 1.331428  |
| 156 | 1 | 0 | 13.760653  | -12.184133 | 5.426660  |
| 157 | 1 | 0 | 12.168566  | -12.045632 | 4.644356  |
| 158 | 1 | 0 | 13.655837  | -11.818442 | 3.688535  |
| 159 | 1 | 0 | 14.197994  | -9.745545  | 5.027721  |
| 160 | 1 | 0 | 12.713064  | -9.972614  | 5.981991  |
| 161 | 1 | 0 | 11.333247  | -9.703407  | 3.900126  |
| 162 | 1 | 0 | 12.819168  | -9.475742  | 2.945134  |
| 163 | 1 | 0 | 13.372265  | -7.430061  | 4.292731  |
| 164 | 1 | 0 | 11.887664  | -7.658785  | 5.249513  |
| 165 | 1 | 0 | 10.506409  | -7.394793  | 3.169133  |
| 166 | 1 | 0 | 11.990844  | -7.164083  | 2.212761  |
| 167 | 1 | 0 | 12.541213  | -5.117765  | 3.558897  |
| 168 | 1 | 0 | 11.059096  | -5.349987  | 4.518945  |
| 169 | 1 | 0 | 9.673016   | -5.091202  | 2.440805  |
| 170 | 1 | 0 | 11.154817  | -4.855499  | 1.481920  |
| 171 | 1 | 0 | 11.702261  | -2.809673  | 2.828355  |
| 172 | 1 | 0 | 10.219282  | -3.042526  | 3.788467  |
| 173 | 1 | 0 | 8.840930   | -2.808467  | 1.698690  |
| 174 | 1 | 0 | 10.317230  | -2.553460  | 0.751523  |
| 175 | 1 | 0 | 10.847549  | -0.546670  | 2.237608  |
| 176 | 1 | 0 | 9.292185   | -0.736143  | 3.019360  |
| 177 | 1 | 0 | -11.245246 | 12.402402  | 5.975393  |
| 178 | 1 | 0 | -9.732513  | 11.978808  | 5.139874  |
| 179 | 1 | 0 | -11.259019 | 12.081183  | 4.225384  |
| 180 | 1 | 0 | -12.166850 | 10.112453  | 5.523436  |
| 181 | 1 | 0 | -10.642453 | 10.010453  | 6.436135  |
| 182 | 1 | 0 | -9.397235  | 9.545148   | 4.304412  |
| 183 | 1 | 0 | -10.923185 | 9.644747   | 3.391655  |
| 184 | 1 | 0 | -11.833000 | 7.703258   | 4.698687  |
| 185 | 1 | 0 | -10.309066 | 7.606020   | 5.615326  |
| 186 | 1 | 0 | -9.058761  | 7.149063   | 3.485502  |
| 187 | 1 | 0 | -10.584276 | 7.238668   | 2.571207  |
| 188 | 1 | 0 | -11.483671 | 5.292692   | 3.876096  |



|     |   |   |            |            |           |
|-----|---|---|------------|------------|-----------|
| 189 | 1 | 0 | -9.963216  | 5.208143   | 4.799974  |
| 190 | 1 | 0 | -8.699835  | 4.761660   | 2.674622  |
| 191 | 1 | 0 | -10.223154 | 4.832064   | 1.755520  |
| 192 | 1 | 0 | -11.105538 | 2.880466   | 3.060808  |
| 193 | 1 | 0 | -9.587548  | 2.813074   | 3.991705  |
| 194 | 1 | 0 | -8.314310  | 2.402607   | 1.861329  |
| 195 | 1 | 0 | -9.832603  | 2.429019   | 0.947743  |
| 196 | 1 | 0 | -10.672392 | 0.507054   | 2.390123  |
| 197 | 1 | 0 | -9.101260  | 0.409780   | 3.158742  |
| 198 | 1 | 0 | -22.139146 | 4.811564   | -1.371639 |
| 199 | 1 | 0 | -20.670151 | 5.787310   | -1.135671 |
| 200 | 1 | 0 | -20.928262 | 4.919076   | -2.670875 |
| 201 | 1 | 0 | -20.765055 | 2.713393   | -1.449104 |
| 202 | 1 | 0 | -20.507172 | 3.580537   | 0.083366  |
| 203 | 1 | 0 | -18.393017 | 4.578359   | -0.836986 |
| 204 | 1 | 0 | -18.649716 | 3.707629   | -2.369322 |
| 205 | 1 | 0 | -18.513667 | 1.517545   | -1.148764 |
| 206 | 1 | 0 | -18.262793 | 2.387592   | 0.384784  |
| 207 | 1 | 0 | -16.149811 | 3.390358   | -0.531999 |
| 208 | 1 | 0 | -16.396843 | 2.511390   | -2.061158 |
| 209 | 1 | 0 | -16.258960 | 0.328190   | -0.831667 |
| 210 | 1 | 0 | -16.027365 | 1.204700   | 0.701111  |
| 211 | 1 | 0 | -13.911660 | 2.216988   | -0.201998 |
| 212 | 1 | 0 | -14.134943 | 1.320974   | -1.725040 |
| 213 | 1 | 0 | -13.994818 | -0.849129  | -0.474052 |
| 214 | 1 | 0 | -13.797793 | 0.044047   | 1.054838  |
| 215 | 1 | 0 | -11.688134 | 1.080954   | 0.160168  |
| 216 | 1 | 0 | -11.857945 | 0.141678   | -1.335026 |
| 217 | 1 | 0 | -11.750707 | -1.988989  | -0.003624 |
| 218 | 1 | 0 | -11.604977 | -1.125993  | 1.469435  |
| 219 | 1 | 0 | -14.950068 | -13.796382 | -3.714703 |
| 220 | 1 | 0 | -13.363600 | -13.726793 | -2.912034 |
| 221 | 1 | 0 | -14.827345 | -13.196509 | -2.044129 |
| 222 | 1 | 0 | -15.106450 | -11.292199 | -3.680428 |
| 223 | 1 | 0 | -13.645270 | -11.821343 | -4.547717 |
| 224 | 1 | 0 | -12.270947 | -11.409676 | -2.485686 |
| 225 | 1 | 0 | -13.733380 | -10.882473 | -1.616744 |
| 226 | 1 | 0 | -14.031495 | -9.005434  | -3.259116 |
| 227 | 1 | 0 | -12.566039 | -9.530197  | -4.124584 |
| 228 | 1 | 0 | -11.197889 | -9.117995  | -2.060680 |
| 229 | 1 | 0 | -12.663628 | -8.601014  | -1.191505 |
| 230 | 1 | 0 | -12.970352 | -6.722144  | -2.830913 |
| 231 | 1 | 0 | -11.497042 | -7.233564  | -3.691119 |
| 232 | 1 | 0 | -10.140684 | -6.816529  | -1.621224 |
| 233 | 1 | 0 | -11.614629 | -6.320621  | -0.753833 |
| 234 | 1 | 0 | -11.936791 | -4.436579  | -2.385675 |
| 235 | 1 | 0 | -10.448957 | -4.922299  | -3.237077 |
| 236 | 1 | 0 | -9.116750  | -4.498702  | -1.149181 |
| 237 | 1 | 0 | -10.602235 | -4.044673  | -0.291703 |
| 238 | 1 | 0 | -10.917964 | -2.150074  | -2.024725 |
| 239 | 1 | 0 | -9.395919  | -2.606636  | -2.731435 |

DFT calculation data for **PBI- $\text{Se}^{10}$** :

| Center No. | Atomic No. | Atomic Type | Coordinates (Angstroms) |   |   |
|------------|------------|-------------|-------------------------|---|---|
|            |            |             | X                       | Y | Z |

|    |    |   |            |           |           |
|----|----|---|------------|-----------|-----------|
| 1  | 6  | 0 | -3.109191  | 2.206517  | 0.377847  |
| 2  | 6  | 0 | -1.739158  | 2.352105  | 0.634949  |
| 3  | 6  | 0 | -0.788413  | 1.538941  | 0.008023  |
| 4  | 6  | 0 | -1.282026  | 0.559492  | -0.910434 |
| 5  | 6  | 0 | -2.664815  | 0.408623  | -1.174594 |
| 6  | 6  | 0 | -3.581590  | 1.247377  | -0.513390 |
| 7  | 6  | 0 | -0.399489  | -0.304755 | -1.585451 |
| 8  | 6  | 0 | -0.824932  | -1.281265 | -2.488590 |
| 9  | 6  | 0 | -2.200243  | -1.424310 | -2.749208 |
| 10 | 6  | 0 | -3.098650  | -0.590299 | -2.096123 |
| 11 | 6  | 0 | 0.669420   | 1.620839  | 0.238253  |
| 12 | 6  | 0 | 1.525416   | 0.717561  | -0.467413 |
| 13 | 6  | 0 | 0.993072   | -0.226248 | -1.365814 |
| 14 | 6  | 0 | 1.286572   | 2.521978  | 1.113010  |
| 15 | 6  | 0 | 2.676593   | 2.531486  | 1.291750  |
| 16 | 6  | 0 | 3.501968   | 1.646227  | 0.604302  |
| 17 | 6  | 0 | 2.930388   | 0.724254  | -0.292380 |
| 18 | 6  | 0 | 3.733379   | -0.203126 | -1.020658 |
| 19 | 6  | 0 | 3.175792   | -1.119378 | -1.903234 |
| 20 | 6  | 0 | 1.779673   | -1.134063 | -2.078118 |
| 21 | 6  | 0 | -4.551052  | -0.754342 | -2.370844 |
| 22 | 7  | 0 | -5.435558  | 0.088083  | -1.653624 |
| 23 | 6  | 0 | -5.039731  | 1.101159  | -0.745764 |
| 24 | 6  | 0 | 4.967809   | 1.665983  | 0.832047  |
| 25 | 7  | 0 | 5.734066   | 0.724582  | 0.100295  |
| 26 | 6  | 0 | 5.209226   | -0.199908 | -0.836155 |
| 27 | 8  | 0 | -5.862103  | 1.801475  | -0.180506 |
| 28 | 8  | 0 | -4.971548  | -1.585781 | -3.157743 |
| 29 | 8  | 0 | 5.492757   | 2.441321  | 1.612933  |
| 30 | 8  | 0 | 5.939144   | -0.962559 | -1.446879 |
| 31 | 6  | 0 | -6.856692  | -0.101639 | -1.862633 |
| 32 | 6  | 0 | 7.164247   | 0.703953  | 0.332465  |
| 33 | 6  | 0 | -7.450203  | -1.307674 | -1.519774 |
| 34 | 6  | 0 | -8.821691  | -1.509737 | -1.704835 |
| 35 | 6  | 0 | -9.621673  | -0.473083 | -2.240706 |
| 36 | 6  | 0 | -9.003714  | 0.752646  | -2.599997 |
| 37 | 6  | 0 | -7.628117  | 0.917033  | -2.407938 |
| 38 | 6  | 0 | 7.766851   | -0.441684 | 0.833600  |
| 39 | 6  | 0 | 9.144091   | -0.482304 | 1.076760  |
| 40 | 6  | 0 | 9.929354   | 0.672319  | 0.848262  |
| 41 | 6  | 0 | 9.305178   | 1.835185  | 0.336041  |
| 42 | 6  | 0 | 7.932695   | 1.832093  | 0.072331  |
| 43 | 34 | 0 | 0.674370   | -2.227028 | -3.168059 |
| 44 | 6  | 0 | -16.006018 | 11.304474 | -0.554571 |
| 45 | 6  | 0 | -15.298281 | 10.421128 | -1.585899 |
| 46 | 6  | 0 | -14.593031 | 9.209364  | -0.965347 |
| 47 | 6  | 0 | -13.887121 | 8.315197  | -1.991271 |
| 48 | 6  | 0 | -13.189889 | 7.099834  | -1.369351 |
| 49 | 6  | 0 | -12.492534 | 6.197771  | -2.394530 |
| 50 | 6  | 0 | -11.806799 | 4.977367  | -1.769493 |
| 51 | 6  | 0 | -11.119765 | 4.064925  | -2.792610 |
| 52 | 6  | 0 | -10.443059 | 2.843551  | -2.160536 |
| 53 | 6  | 0 | -9.755585  | 1.932401  | -3.196521 |
| 54 | 6  | 0 | -21.253009 | -1.854263 | 3.015353  |
| 55 | 6  | 0 | -20.438283 | -1.708956 | 1.727040  |

|     |   |   |            |            |           |
|-----|---|---|------------|------------|-----------|
| 56  | 6 | 0 | -18.933480 | -1.549576  | 1.975290  |
| 57  | 6 | 0 | -18.109489 | -1.407002  | 0.690547  |
| 58  | 6 | 0 | -16.604580 | -1.252524  | 0.939610  |
| 59  | 6 | 0 | -15.779049 | -1.122272  | -0.345691 |
| 60  | 6 | 0 | -14.273365 | -0.975614  | -0.095857 |
| 61  | 6 | 0 | -13.445224 | -0.866552  | -1.381560 |
| 62  | 6 | 0 | -11.939706 | -0.723881  | -1.129126 |
| 63  | 6 | 0 | -11.114837 | -0.682714  | -2.434014 |
| 64  | 6 | 0 | -11.288593 | -9.424225  | 8.054913  |
| 65  | 6 | 0 | -11.348460 | -9.218794  | 6.538614  |
| 66  | 6 | 0 | -10.843844 | -7.841321  | 6.092273  |
| 67  | 6 | 0 | -10.894142 | -7.628768  | 4.574908  |
| 68  | 6 | 0 | -10.389496 | -6.250458  | 4.132118  |
| 69  | 6 | 0 | -10.424574 | -6.038566  | 2.613997  |
| 70  | 6 | 0 | -9.916556  | -4.658934  | 2.179082  |
| 71  | 6 | 0 | -9.927207  | -4.445215  | 0.660699  |
| 72  | 6 | 0 | -9.412859  | -3.063723  | 0.241512  |
| 73  | 6 | 0 | -9.372119  | -2.864427  | -1.287568 |
| 74  | 6 | 0 | 11.661867  | -12.827545 | -1.313685 |
| 75  | 6 | 0 | 11.675090  | -11.684417 | -0.295058 |
| 76  | 6 | 0 | 11.202041  | -10.346304 | -0.876012 |
| 77  | 6 | 0 | 11.210201  | -9.199119  | 0.140605  |
| 78  | 6 | 0 | 10.734975  | -7.859803  | -0.435169 |
| 79  | 6 | 0 | 10.735736  | -6.719762  | 0.589762  |
| 80  | 6 | 0 | 10.255453  | -5.378057  | 0.023521  |
| 81  | 6 | 0 | 10.242218  | -4.249780  | 1.061506  |
| 82  | 6 | 0 | 9.751972   | -2.907247  | 0.507797  |
| 83  | 6 | 0 | 9.707326   | -1.800925  | 1.581609  |
| 84  | 6 | 0 | 21.755987  | -1.901409  | -3.398320 |
| 85  | 6 | 0 | 20.895158  | -1.358842  | -2.254042 |
| 86  | 6 | 0 | 19.392618  | -1.386576  | -2.558687 |
| 87  | 6 | 0 | 18.523604  | -0.846007  | -1.417355 |
| 88  | 6 | 0 | 17.021205  | -0.874372  | -1.721381 |
| 89  | 6 | 0 | 16.153341  | -0.336544  | -0.577595 |
| 90  | 6 | 0 | 14.650468  | -0.366304  | -0.879576 |
| 91  | 6 | 0 | 13.784303  | 0.166865   | 0.267801  |
| 92  | 6 | 0 | 12.281755  | 0.135882   | -0.032970 |
| 93  | 6 | 0 | 11.423062  | 0.673229   | 1.130222  |
| 94  | 6 | 0 | 12.684083  | 12.898772  | 5.769877  |
| 95  | 6 | 0 | 12.737182  | 12.054777  | 4.493289  |
| 96  | 6 | 0 | 12.046529  | 10.693414  | 4.638384  |
| 97  | 6 | 0 | 12.092306  | 9.838344   | 3.366810  |
| 98  | 6 | 0 | 11.398634  | 8.479703   | 3.520667  |
| 99  | 6 | 0 | 11.436977  | 7.615520   | 2.254831  |
| 100 | 6 | 0 | 10.736777  | 6.262108   | 2.425978  |
| 101 | 6 | 0 | 10.762266  | 5.381483   | 1.171118  |
| 102 | 6 | 0 | 10.051895  | 4.038245   | 1.372476  |
| 103 | 6 | 0 | 10.050237  | 3.141278   | 0.117613  |
| 104 | 1 | 0 | -3.837435  | 2.838543   | 0.874561  |
| 105 | 1 | 0 | -1.422323  | 3.112573   | 1.340098  |
| 106 | 1 | 0 | -2.601846  | -2.159352  | -3.437953 |
| 107 | 1 | 0 | 0.687202   | 3.230614   | 1.673802  |
| 108 | 1 | 0 | 3.143161   | 3.230252   | 1.977713  |
| 109 | 1 | 0 | 3.847510   | -1.792785  | -2.424089 |
| 110 | 1 | 0 | -6.839039  | -2.110798  | -1.122299 |
| 111 | 1 | 0 | -7.158170  | 1.855031   | -2.682207 |

|     |   |   |            |            |           |
|-----|---|---|------------|------------|-----------|
| 112 | 1 | 0 | 7.162350   | -1.320536  | 1.029988  |
| 113 | 1 | 0 | 7.458203   | 2.728630   | -0.311037 |
| 114 | 1 | 0 | -16.501295 | 12.157460  | -1.029612 |
| 115 | 1 | 0 | -16.768798 | 10.739829  | -0.006447 |
| 116 | 1 | 0 | -15.297357 | 11.699509  | 0.182314  |
| 117 | 1 | 0 | -14.564771 | 11.021003  | -2.141831 |
| 118 | 1 | 0 | -16.026594 | 10.072673  | -2.331024 |
| 119 | 1 | 0 | -15.326625 | 8.611354   | -0.405542 |
| 120 | 1 | 0 | -13.861936 | 9.557707   | -0.221365 |
| 121 | 1 | 0 | -13.150335 | 8.911713   | -2.548205 |
| 122 | 1 | 0 | -14.618452 | 7.971551   | -2.737005 |
| 123 | 1 | 0 | -13.926524 | 6.507720   | -0.807547 |
| 124 | 1 | 0 | -12.454460 | 7.443249   | -0.627644 |
| 125 | 1 | 0 | -11.750229 | 6.786270   | -2.952533 |
| 126 | 1 | 0 | -13.227171 | 5.859675   | -3.139515 |
| 127 | 1 | 0 | -12.548835 | 4.394627   | -1.205062 |
| 128 | 1 | 0 | -11.066830 | 5.315256   | -1.030060 |
| 129 | 1 | 0 | -10.373318 | 4.644253   | -3.354653 |
| 130 | 1 | 0 | -11.858741 | 3.729862   | -3.534923 |
| 131 | 1 | 0 | -11.185081 | 2.267447   | -1.594919 |
| 132 | 1 | 0 | -9.694397  | 3.172308   | -1.427658 |
| 133 | 1 | 0 | -9.038424  | 2.539874   | -3.760994 |
| 134 | 1 | 0 | -10.498476 | 1.593672   | -3.927854 |
| 135 | 1 | 0 | -22.321253 | -1.966866  | 2.803919  |
| 136 | 1 | 0 | -20.933085 | -2.731250  | 3.589523  |
| 137 | 1 | 0 | -21.132212 | -0.977189  | 3.661353  |
| 138 | 1 | 0 | -20.804304 | -0.844072  | 1.156991  |
| 139 | 1 | 0 | -20.607904 | -2.584236  | 1.085152  |
| 140 | 1 | 0 | -18.567429 | -2.413881  | 2.548060  |
| 141 | 1 | 0 | -18.762847 | -0.672779  | 2.616595  |
| 142 | 1 | 0 | -18.474351 | -0.541408  | 0.119081  |
| 143 | 1 | 0 | -18.283017 | -2.283148  | 0.049294  |
| 144 | 1 | 0 | -16.242059 | -2.114746  | 1.517423  |
| 145 | 1 | 0 | -16.429462 | -0.372518  | 1.574958  |
| 146 | 1 | 0 | -16.138273 | -0.258063  | -0.922717 |
| 147 | 1 | 0 | -15.957121 | -2.001367  | -0.981571 |
| 148 | 1 | 0 | -13.918134 | -1.833891  | 0.492072  |
| 149 | 1 | 0 | -14.092443 | -0.089954  | 0.529756  |
| 150 | 1 | 0 | -13.798602 | -0.008670  | -1.971634 |
| 151 | 1 | 0 | -13.626590 | -1.753455  | -2.005842 |
| 152 | 1 | 0 | -11.596700 | -1.559017  | -0.506350 |
| 153 | 1 | 0 | -11.744976 | 0.182829   | -0.543095 |
| 154 | 1 | 0 | -11.520567 | 0.102053   | -3.077245 |
| 155 | 1 | 0 | -11.283871 | -1.621931  | -2.974274 |
| 156 | 1 | 0 | -11.655568 | -10.415429 | 8.340128  |
| 157 | 1 | 0 | -10.262123 | -9.329395  | 8.426955  |
| 158 | 1 | 0 | -11.898055 | -8.679864  | 8.579962  |
| 159 | 1 | 0 | -12.381295 | -9.355886  | 6.190258  |
| 160 | 1 | 0 | -10.758012 | -9.999173  | 6.039333  |
| 161 | 1 | 0 | -9.811523  | -7.701892  | 6.444330  |
| 162 | 1 | 0 | -11.436695 | -7.059856  | 6.589239  |
| 163 | 1 | 0 | -11.925890 | -7.769710  | 4.222105  |
| 164 | 1 | 0 | -10.299629 | -8.409675  | 4.079294  |
| 165 | 1 | 0 | -9.360918  | -6.107535  | 4.493185  |
| 166 | 1 | 0 | -10.988896 | -5.469574  | 4.621708  |
| 167 | 1 | 0 | -11.452099 | -6.181070  | 2.249875  |

|     |   |   |            |            |           |
|-----|---|---|------------|------------|-----------|
| 168 | 1 | 0 | -9.823150  | -6.818062  | 2.124665  |
| 169 | 1 | 0 | -8.893929  | -4.514407  | 2.555848  |
| 170 | 1 | 0 | -10.524555 | -3.879419  | 2.659979  |
| 171 | 1 | 0 | -10.948149 | -4.588345  | 0.278432  |
| 172 | 1 | 0 | -9.316348  | -5.222573  | 0.179593  |
| 173 | 1 | 0 | -8.404705  | -2.911572  | 0.648952  |
| 174 | 1 | 0 | -10.036917 | -2.281977  | 0.693905  |
| 175 | 1 | 0 | -10.374535 | -3.025212  | -1.692400 |
| 176 | 1 | 0 | -8.738806  | -3.648433  | -1.722932 |
| 177 | 1 | 0 | 12.004937  | -13.766402 | -0.867132 |
| 178 | 1 | 0 | 10.653107  | -12.995744 | -1.707680 |
| 179 | 1 | 0 | 12.314443  | -12.606580 | -2.165990 |
| 180 | 1 | 0 | 12.689815  | -11.564282 | 0.108523  |
| 181 | 1 | 0 | 11.041439  | -11.949654 | 0.562306  |
| 182 | 1 | 0 | 10.187160  | -10.466358 | -1.281877 |
| 183 | 1 | 0 | 11.836655  | -10.078923 | -1.733234 |
| 184 | 1 | 0 | 12.225460  | -9.079896  | 0.545582  |
| 185 | 1 | 0 | 10.576959  | -9.469657  | 0.997779  |
| 186 | 1 | 0 | 9.721779   | -7.979619  | -0.844799 |
| 187 | 1 | 0 | 11.371552  | -7.584001  | -1.287998 |
| 188 | 1 | 0 | 11.749359  | -6.599148  | 0.998383  |
| 189 | 1 | 0 | 10.101515  | -6.999605  | 1.443204  |
| 190 | 1 | 0 | 9.245557   | -5.499701  | -0.393134 |
| 191 | 1 | 0 | 10.895125  | -5.089145  | -0.822431 |
| 192 | 1 | 0 | 11.252629  | -4.125603  | 1.477149  |
| 193 | 1 | 0 | 9.606068   | -4.544940  | 1.908533  |
| 194 | 1 | 0 | 8.751821   | -3.030165  | 0.072660  |
| 195 | 1 | 0 | 10.397877  | -2.586984  | -0.320209 |
| 196 | 1 | 0 | 10.710777  | -1.670497  | 1.993889  |
| 197 | 1 | 0 | 9.082800   | -2.153697  | 2.413532  |
| 198 | 1 | 0 | 22.821646  | -1.866698  | -3.149924 |
| 199 | 1 | 0 | 21.501303  | -2.942689  | -3.626518 |
| 200 | 1 | 0 | 21.608841  | -1.319223  | -4.315151 |
| 201 | 1 | 0 | 21.198291  | -0.328235  | -2.024012 |
| 202 | 1 | 0 | 21.089690  | -1.938976  | -1.341609 |
| 203 | 1 | 0 | 19.088963  | -2.417742  | -2.790391 |
| 204 | 1 | 0 | 19.197270  | -0.805649  | -3.471650 |
| 205 | 1 | 0 | 18.827925  | 0.185030   | -1.186428 |
| 206 | 1 | 0 | 18.720399  | -1.426940  | -0.504819 |
| 207 | 1 | 0 | 16.717082  | -1.904941  | -1.954287 |
| 208 | 1 | 0 | 16.823640  | -0.291435  | -2.632387 |
| 209 | 1 | 0 | 16.456749  | 0.694444   | -0.345469 |
| 210 | 1 | 0 | 16.352185  | -0.918702  | 0.333664  |
| 211 | 1 | 0 | 14.347301  | -1.396469  | -1.115020 |
| 212 | 1 | 0 | 14.450305  | 0.219228   | -1.788225 |
| 213 | 1 | 0 | 14.086889  | 1.197484   | 0.503041  |
| 214 | 1 | 0 | 13.985519  | -0.417707  | 1.177156  |
| 215 | 1 | 0 | 11.973990  | -0.890294  | -0.270449 |
| 216 | 1 | 0 | 12.072911  | 0.724795   | -0.936352 |
| 217 | 1 | 0 | 11.753776  | 1.688267   | 1.365238  |
| 218 | 1 | 0 | 11.635971  | 0.083422   | 2.027801  |
| 219 | 1 | 0 | 13.185879  | 13.862389  | 5.635155  |
| 220 | 1 | 0 | 11.649029  | 13.101252  | 6.067947  |
| 221 | 1 | 0 | 13.171235  | 12.383615  | 6.605637  |
| 222 | 1 | 0 | 13.784212  | 11.899552  | 4.199066  |
| 223 | 1 | 0 | 12.272635  | 12.609688  | 3.666754  |

|     |   |   |           |           |           |
|-----|---|---|-----------|-----------|-----------|
| 224 | 1 | 0 | 10.998961 | 10.848988 | 4.934271  |
| 225 | 1 | 0 | 12.511048 | 10.138524 | 5.466323  |
| 226 | 1 | 0 | 13.139645 | 9.681030  | 3.071510  |
| 227 | 1 | 0 | 11.627747 | 10.392566 | 2.538641  |
| 228 | 1 | 0 | 10.352335 | 8.639000  | 3.818352  |
| 229 | 1 | 0 | 11.863715 | 7.927467  | 4.349868  |
| 230 | 1 | 0 | 12.482490 | 7.450901  | 1.957175  |
| 231 | 1 | 0 | 10.971479 | 8.164694  | 1.423906  |
| 232 | 1 | 0 | 9.693004  | 6.430030  | 2.726985  |
| 233 | 1 | 0 | 11.202794 | 5.716735  | 3.259116  |
| 234 | 1 | 0 | 11.804693 | 5.205119  | 0.868843  |
| 235 | 1 | 0 | 10.294545 | 5.921334  | 0.335301  |
| 236 | 1 | 0 | 9.012481  | 4.211577  | 1.680218  |
| 237 | 1 | 0 | 10.520091 | 3.497263  | 2.205656  |
| 238 | 1 | 0 | 11.080901 | 2.961642  | -0.205512 |
| 239 | 1 | 0 | 9.567537  | 3.687617  | -0.701662 |

## 12. References:

- S1. X. Zhang, Z. Chen, and F. Würthner; *J. Am. Chem. Soc.* **2007**, *129*, 4886-4887.
- S2. Z. Chen, V. Stepanenko, V. Dehm, P. Prins, L. D. A. Siebbeles, J. Seibt, P. Marquetand, V. Engel, and F. Würthner; *Chem. Eur. J.* **2007**, *13*, 436 – 449.
- S3. R. K. Gupta, D. S. S. Rao, S. Krishna Prasad, and A S. Achalkumar; *Chem. Eur. J.* **2018**, *24*, 3566 – 3575.
- S4. a) Gaussian 09, Revision B.01, M. J. Frisch, G. W. Trucks, H. B. Schlegel, G. E. Scuseria, M. A. Robb, J. R. Cheeseman, G. Scalmani, V. Barone, B. Mennucci, G. A. Petersson, H. Nakatsuji, M. Caricato, X. Li, H. P. Hratchian, A. F. Izmaylov, J. Bloino, G. Zheng, J. L. Sonnenberg, M. Hada, M. Ehara, K. Toyota, R. Fukuda, J. Hasegawa, M. Ishida, T. Nakajima, Y. Honda, O. Kitao, H. Nakai, T. Vreven, J. J. A. Montgomery, J. E. Peralta, F. Ogliaro, M. Bearpark, J. J. Heyd, E. Brothers, K. N. Kudin, V. N. Staroverov, R. Kobayashi, J. Normand, K. Raghavachari, A. Rendell, J. C. Burant, S. S. Iyengar, J. Tomasi, M. Cossi, N. Rega, J. M. Millam, M. Klene, J. E. Knox, J. B. Cross, V. Bakken, C. Adamo, J. Jaramillo, R. Gomperts, R. E. Stratmann, O. Yazyev, A. J. Austin, R. Cammi, C. Pomelli, J. W. Ochterski, R. L. Martin, K. Morokuma, V. G. Zakrzewski, G. A. Voth, P. Salvador, J. J. Dannenberg, S. Dapprich, A. D. Daniels, O. Farkas, J. B. Foresman, J. V. Ortiz and J. Cioslowski Fox, *D. J. Gaussian Inc., Wallingford, CT*, **2009**;
- b) C. Lee, W. Yang and R. G. Parr, *Phys. Rev. B*, **1988**, *37*, 785–789; c) A. D. Becke, *J. Chem. Phys.*, **1993**, *98*, 1372–1377.
